# Supplementary material for: A versatile entry to unnatural, disulfide-linked amino acids and peptides through the disulfuration of azlactones
Source: PubMed Central journal article supplement — Chem Sci. 2025 Jan 7;16(6):2777–84. doi: 10.1039/d4sc07187e (PMC11726236; doi:10.1039/d4sc07187e), 2025-01-07

## Supporting Information

### A versatile entry to unnatural, disulfide-linked amino acids and peptides through the disulfuration of azlactones

Masaki Iwata,<sup>1+</sup> Yuzuki Takami,<sup>1+</sup> Hayato Asanuma,<sup>1+</sup> Kenya Hosono,<sup>2</sup> Hibiki Ohno,<sup>1</sup>  
Naohiko Yoshikai,<sup>1</sup> and Kazuya Kanemoto\*<sup>1,2</sup>

<sup>1</sup>Graduate School of Pharmaceutical Sciences, Tohoku University, 6-3 Aoba, Aramaki, Aoba-ku, Sendai 980-8578 (Japan)

<sup>2</sup>Faculty of Science and Engineering, Chuo University, 1-13-27 Kasuga Bunkyo-ku, Tokyo 112-8551 (Japan)

<sup>+</sup>These authors contributed equally to this work

#### Contents

|                                                                    |     |
|--------------------------------------------------------------------|-----|
| General Remarks                                                    | S1  |
| Preparation of peptide-based <i>N</i> -dithiophthalimide <b>2l</b> | S2  |
| Preliminary investigation of the enantioselective reaction         | S3  |
| Experimental Procedures                                            | S4  |
| Characterization Data of New Compounds                             | S16 |
| References for Supporting Information                              | S32 |
| <sup>1</sup> H and <sup>13</sup> C NMR Spectra of Compounds        | S33 |

#### General Remarks

All reactions were performed with dry glassware under atmosphere of nitrogen unless otherwise noted. The <sup>1</sup>H NMR spectra were obtained with a Varian Mercury 400 NMR spectrometer at 400 MHz, a JEOL ECZ-500R at 500 MHz, or a JEOL JNM-ECA-600 at 600 MHz. The <sup>13</sup>C NMR spectra were obtained with a Varian Mercury 400 NMR spectrometer at 101 MHz, a JEOL ECZ-500R at 125 MHz, or a JEOL JNM-ECA-600 at 150 MHz, respectively. All NMR measurements were carried out at 25 °C unless otherwise noted. Chemical shifts are reported in parts per million (ppm) downfield from (CH<sub>3</sub>)<sub>4</sub>Si (δ 0.00 for <sup>1</sup>H NMR in CDCl<sub>3</sub>) or the solvent peak (δ 3.31 for <sup>1</sup>H NMR in CD<sub>3</sub>OD, δ 77.16 for <sup>13</sup>C NMR in CDCl<sub>3</sub>, or δ 49.00 for <sup>13</sup>C NMR in CD<sub>3</sub>OD). The abbreviations s, d, t, q, m, and br signify singlet, doublet, triplet, quartet, multiplet, and broad, respectively. High-resolution mass spectra (HRMS) were recorded on a JEOL JMS-700 spectrometer equipped with a double focusing mass analyzer or a JMS-T100GC spectrometer equipped with a TOF mass analyzer. Column chromatography was performed with silica gel (Kanto Chemical, 60 (spherical, neutral), 37563-84).

4-Methyl-2-phenyloxazol-5(4*H*)-one (**1a**),<sup>S1</sup> 4-(2-(methylthio)ethyl)-2-phenyloxazol-5(4*H*)-one (**1b**),<sup>S2</sup> 4-benzyl-2-phenyloxazol-5(4*H*)-one (**1c**),<sup>S1</sup> 4-((1*H*-indol-3-yl)methyl)-2-phenyloxazol-5(4*H*)-one (**1f**),<sup>S3</sup> 4-isopropyl-2-phenyloxazol-5(4*H*)-one (**1g**),<sup>S4</sup> 4-ethyl-2-phenyloxazol-5(4*H*)-one (**1h**),<sup>S5</sup> 4-allyl-2-phenyloxazol-5(4*H*)-one (**1i**),<sup>S1</sup> 2-(4-chlorophenyl)-4-methyloxazol-5(4*H*)-one (**1j**),<sup>S1</sup> 2-(allyldisulfanyl)isoindoline-1,3-dione (**2a**),<sup>S6</sup> 2-((2-methylallyl)disulfanyl)isoindoline-1,3-dione (**2b**),<sup>S6</sup> 2-((2-bromoallyl)disulfanyl)isoindoline-1,3-dione (**2c**),<sup>S6</sup> 2-(dodecyldisulfanyl)isoindoline-1,3-dione (**2d**),<sup>S7</sup> 2-(*tert*-butyldisulfanyl)isoindoline-1,3-dione (**2e**),<sup>S7</sup> 2-((4-methoxybenzyl)disulfanyl)isoindoline-1,3-dione (**2f**),<sup>S7</sup> methyl *N*-(*tert*-butoxycarbonyl)-*S*-((1,3-dioxoisoindolin-2-yl)thio)-*L*-cysteinate

(**2g**),<sup>S8</sup> 2-(phenyldisulfanyl)isoindoline-1,3-dione (**2h**),<sup>S7</sup> 2-(*p*-tolyl disulfanyl)isoindoline-1,3-dione (**2i**),<sup>S9</sup> 2-((4-methoxyphenyl)disulfanyl)isoindoline-1,3-dione (**2j**),<sup>S9</sup> *N*-(morpholine-4-dithio)phthalimide (**2k**),<sup>S6</sup> 2-((2-((8*R*,9*S*,13*S*,14*S*)-13-methyl-17-oxo-7,8,9,11,12,13,14,15,16,17-decahydro-6*H*-cyclopenta[*a*]phenanthren-3-yl)allyl)disulfanyl)isoindoline-1,3-dione (**2m**),<sup>S6</sup> *N,N'*-thiobis(phthalimide) (**7**),<sup>S9</sup> *N,N'*-dithiobis(phthalimide) (**11**),<sup>S6</sup> 2-(2-mercaptophenyl)acetic acid,<sup>S10,S11</sup> 2-(((1,3-dioxisoindolin-2-yl)disulfanyl)methyl)allyl (*S*)-2-(4-isobutylphenyl)propanoate (**21**),<sup>S6</sup> and H-Gly-Gly-OMe·HCl (**23**)<sup>S12</sup> were prepared according to the reported methods. All other chemical reagents used were commercial grade and used as received.

### Preparation of peptide-based *N*-dithiophthalimide **21**

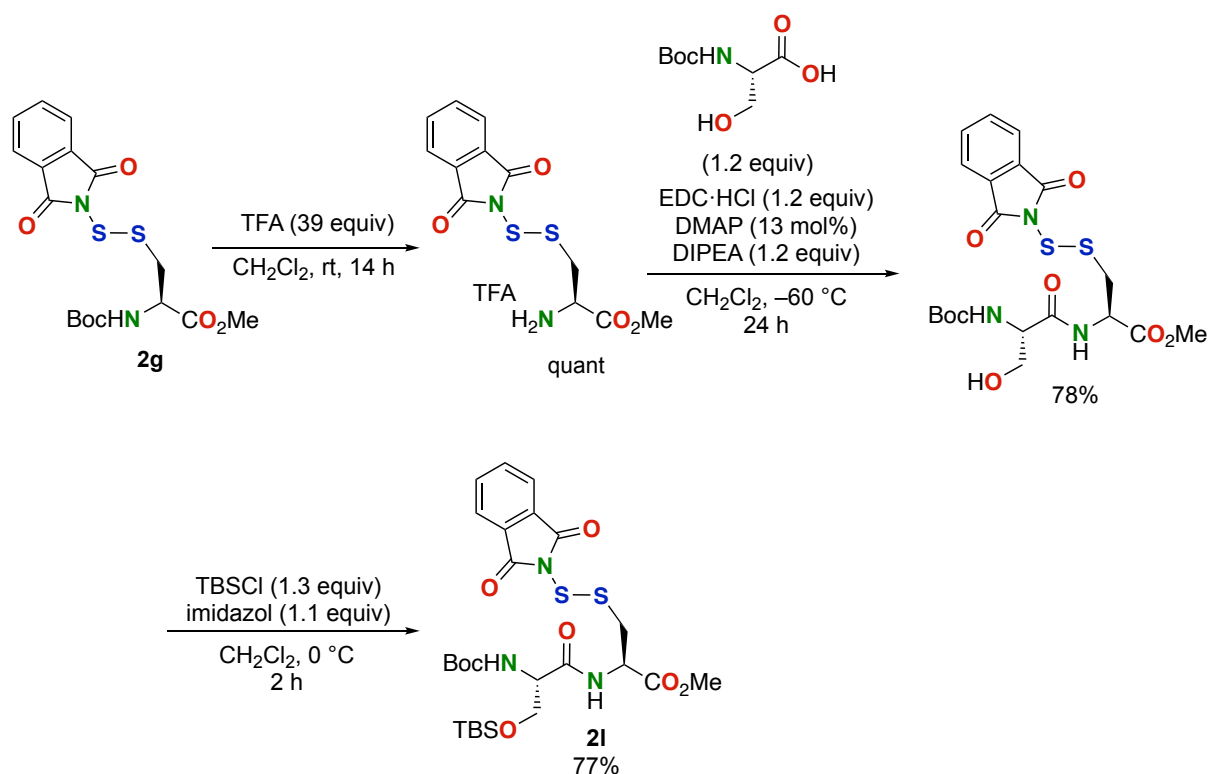

Scheme S1. Preparation of peptide-based *N*-dithiophthalimide **21**

## Preliminary investigation of the enantioselective reaction

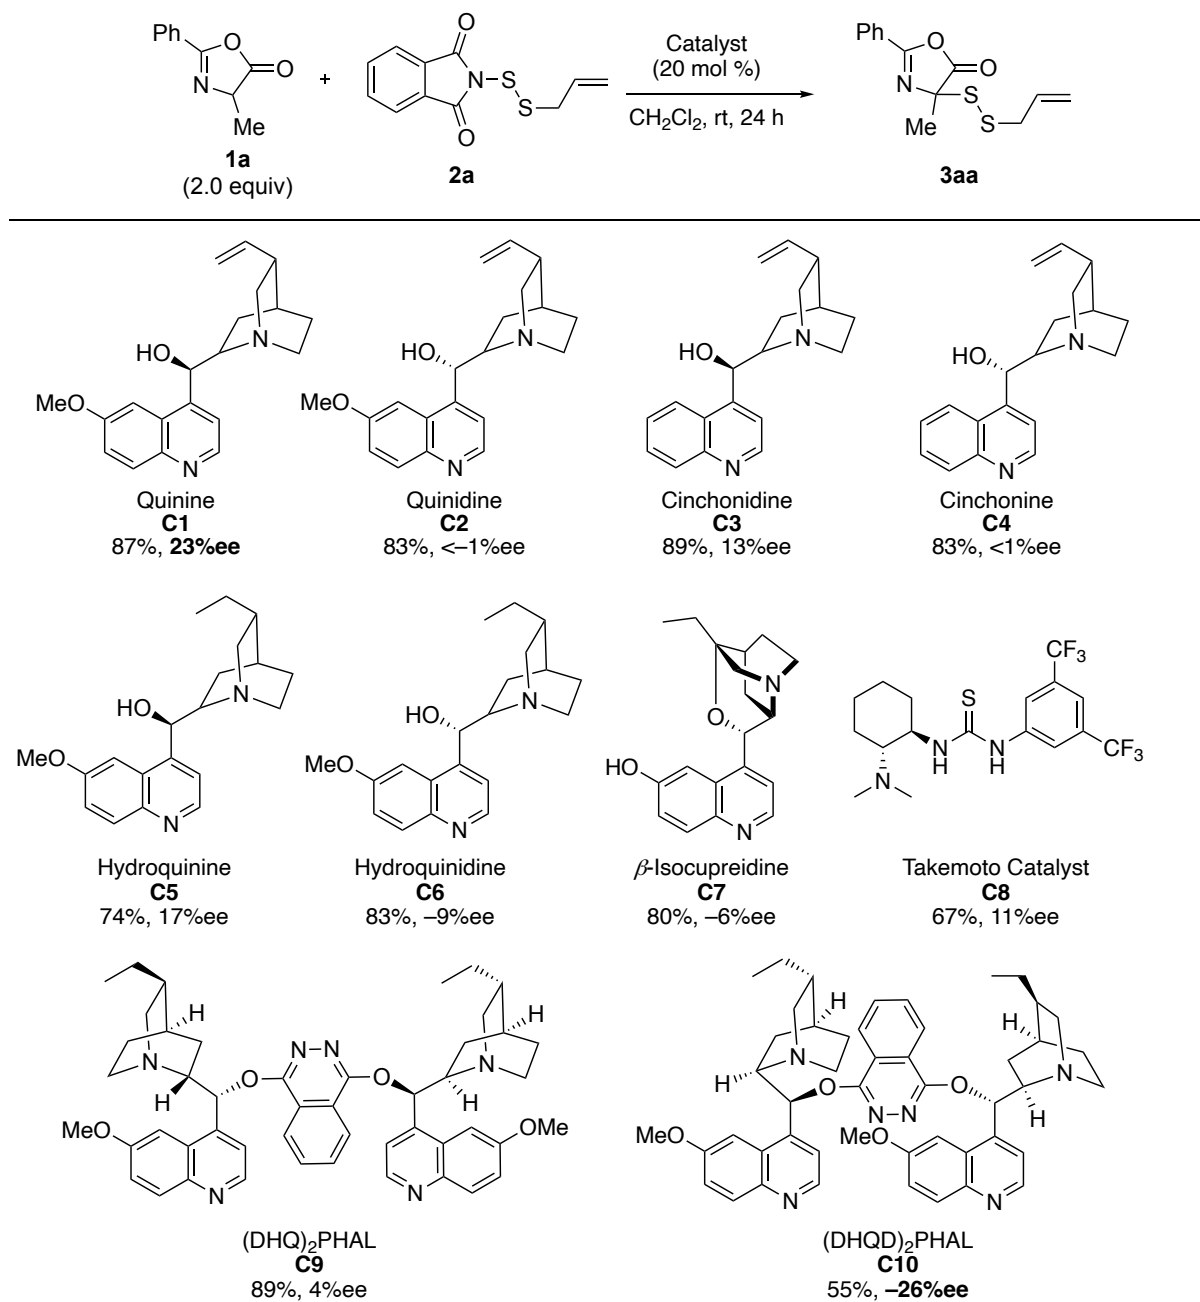

Figure S1. Enantioselective reaction

## Experimental Procedures

A typical procedure for the disulfuration of azlactones **1** with *N*-(organodithio)phthalimides **2**

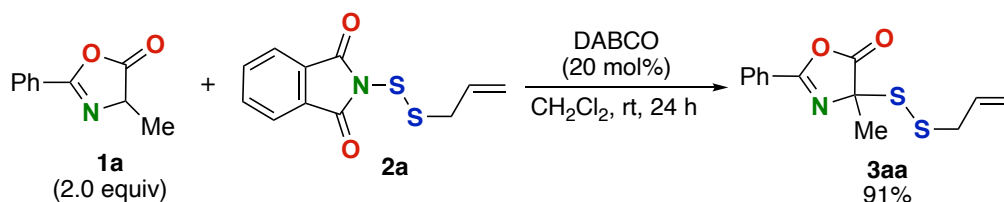

To a mixture of 4-methyl-2-phenyloxazol-5(4H)-one (**1a**) (35.8 mg, 0.204 mmol, 2.03 equiv) and 2-(allyldisulfanyl)isoindoline-1,3-dione (**2a**) (25.3 mg, 0.101 mmol, 1.00 equiv) dissolved in CH<sub>2</sub>Cl<sub>2</sub> (1.0 mL) was added DABCO (2.3 mg, 21 μmol, 20 mol%) at room temperature. After stirring for 24 h at the same temperature, the mixture was concentrated under reduced pressure. The residue was purified by column chromatography (silica gel, 9 g, hexane/EtOAc = 20/1 to 8/1) to give 4-(allyldisulfanyl)-4-methyl-2-phenyloxazol-5(4H)-one (**3aa**) (25.5 mg, 91.3 μmol, 90.7%) as a colorless oil.

According to the procedure for preparing 4-(allyldisulfanyl)-4-methyl-2-phenyloxazol-5(4H)-one (**3aa**), 4-(allyldisulfanyl)-4-(2-(methylthio)ethyl)-2-phenyloxazol-5(4H)-one (**3ba**) (31.1 mg, 91.4%), *N*-(4-(4-(allyldisulfanyl)-5-oxo-2-phenyl-4,5-dihydrooxazol-4-yl)butyl)benzamide (**3ca**) (47.2 mg, quant), 4-(allyldisulfanyl)-4-isobutyl-2-phenyloxazol-5(4H)-one (**3da**) (32.6 mg, quant, 1.0 equiv of DABCO was used), 4-(allyldisulfanyl)-4-benzyl-2-phenyloxazol-5(4H)-one (**3ea**) (32.8 mg, 91.7%), 4-((1*H*-indol-3-yl)methyl)-4-(allyldisulfanyl)-2-phenyloxazol-5(4H)-one (**3fa**) (35.0 mg, 88.1%), 4-(allyldisulfanyl)-4-isopropyl-2-phenyloxazol-5(4H)-one (**3ga**) (32.2 mg, quant), 4-(allyldisulfanyl)-4-ethyl-2-phenyloxazol-5(4H)-one (**3ha**) (27.8 mg, 93.8%), 4-allyl-4-(allyldisulfanyl)-2-phenyloxazol-5(4H)-one (**3ia**) (26.9 mg, 87.1%), 4-(allyldisulfanyl)-2-(4-chlorophenyl)-4-methyloxazol-5(4H)-one (**3ja**) (78.4 mg, 81.8%), *tert*-butyl ((4-(allyldisulfanyl)-4-benzyl-5-oxo-4,5-dihydrooxazol-2-yl)methyl)carbamate (**3ka**) (34.0 mg, 83.3%, 6.0 equiv of *tert*-butyl ((4-benzyl-5-oxo-4,5-dihydrooxazol-2-yl)methyl)carbamate (**1k**) was used with DIPEA (20 mol%) at -78 °C), 4-methyl-4-((2-methylallyl)disulfanyl)-2-phenyloxazol-5(4H)-one (**3ab**) (23.3 mg, 78.9%), 4-((2-bromoallyl)disulfanyl)-4-methyl-2-phenyloxazol-5(4H)-one (**3ac**) (30.1 mg, 83.8%), 4-(dodecyldisulfanyl)-4-methyl-2-phenyloxazol-5(4H)-one (**3ad**) (34.2 mg, 83.8%), 4-(*tert*-butyldisulfanyl)-4-methyl-2-phenyloxazol-5(4H)-one (**3ae**) (21.3 mg, 71.7%), 4-((4-methoxybenzyl)disulfanyl)-4-methyl-2-phenyloxazol-5(4H)-one (**3af**) (36.8 mg, quant), methyl *N*-(*tert*-butoxycarbonyl)-*S*-((4-methyl-5-oxo-2-phenyl-4,5-dihydrooxazol-4-yl)thio)-*L*-cysteinate (**3ag**) (41.1 mg, 88.3%, 1:1 dr), 4-methyl-2-phenyl-4-(phenyldisulfanyl)oxazol-5(4H)-one (**3ah**) (95.8%, <sup>1</sup>H NMR yield based on 1,1,2,2-tetrachloroethane, azlactone (4.0 equiv) and DABCO (40 mol%) at 0 °C), 4-methyl-2-phenyl-4-(*p*-tolyl)disulfanyl)oxazol-5(4H)-one (**3ai**) (97.0%, <sup>1</sup>H NMR yield based on 1,1,2,2-tetrachloroethane, azlactone (4.0 equiv) and DABCO (40 mol%) at 0 °C), 4-((4-methoxyphenyl)disulfanyl)-4-methyl-2-phenyloxazol-5(4H)-one (**3aj**) (80.1%, <sup>1</sup>H NMR yield based on 1,1,2,2-tetrachloroethane, azlactone (4.0 equiv) and DABCO (40 mol%) at 0 °C), 4-methyl-4-(morpholinodisulfanyl)-2-phenyloxazol-5(4H)-one (**3ak**) (28.6 mg, 87.7%, K<sub>2</sub>CO<sub>3</sub> (1.0 equiv)), methyl *N*-(*N*-(*tert*-butoxycarbonyl)-*O*-(*tert*-butyldimethylsilyl)-*L*-seryl)-*S*-((4-methyl-5-oxo-2-phenyl-4,5-dihydrooxazol-4-yl)thio)-*L*-cysteinate (**3al**) (41.5 mg, 87.0%, 1.1:1 dr), 4-methyl-4-((2-((8*R*,9*S*,13*S*,14*S*)-13-methyl-17-oxo-7,8,9,11,12,13,14,15,16,17-decahydro-6*H*-cyclopenta[*a*]phenanthren-3-yl)allyl)disulfanyl)-2-phenyloxazol-5(4H)-one (**3am**) (44.4 mg,

82.8%, 1:1 dr), 2-(((4-benzyl-5-oxo-2-phenyl-4,5-dihydrooxazol-4-yl)disulfanyl)methyl)allyl 9*H*-fluorene-1-carboxylate (**6**) (27.0 mg, 93.0%), (2*S*,3*S*,4*R*,5*S*,6*R*)-2-(acetoxymethyl)-6-(((4-isopropyl-5-oxo-2-phenyl-4,5-dihydrooxazol-4-yl)disulfanyl)tetrahydro-2*H*-pyran-3,4,5-triyl triacetate (**10**) (25.6 mg, 42.8%, 1:1 dr), 4-(((3-(9,10-ethanoanthracen-9(10*H*)-yl)propyl)(methyl)amino)disulfanyl)-4-(2-(methylthio)ethyl)-2-phenyloxazol-5(4*H*)-one (**14**) (46.7 mg, 80.7%), and 2-(((4-methyl-5-oxo-2-phenyl-4,5-dihydrooxazol-4-yl)disulfanyl)methyl)allyl (2*S*)-2-(4-isobutylphenyl)propanoate (**22**) (40.8 mg, 81.2%, 1:1 dr) were prepared from the corresponding azlactones **1** and *N*-(organodithio)phthalimides **2**.

*A typical procedure for the disulfuration reaction using 1 mmol of N-(allyldithio)phthalimide (2a)*

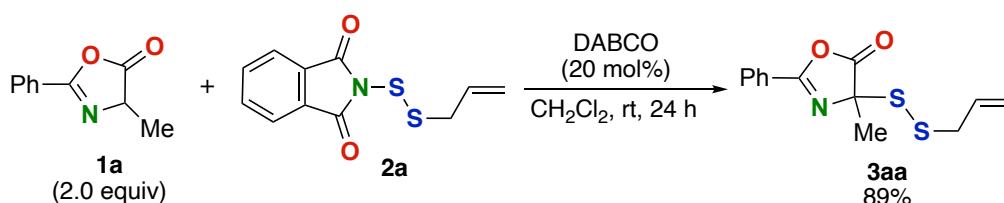

To a mixture of 4-methyl-2-phenyloxazol-5(4*H*)-one (**1a**) (351 mg, 2.00 mmol, 2.00 equiv) and 2-(allyldisulfanyl)isoindoline-1,3-dione (**2a**) (252 mg, 1.00 mmol, 1.00 equiv) dissolved in CH<sub>2</sub>Cl<sub>2</sub> (10.0 mL) was added DABCO (22.8 mg, 0.203 mmol, 20.3 mol%) at room temperature. After stirring for 24 h at the same temperature, the mixture was concentrated under reduced pressure. The residue was purified by column chromatography (silica gel, 30 g, hexane/EtOAc = 20/1 to 8/1) to give 4-(allyldisulfanyl)-4-methyl-2-phenyloxazol-5(4*H*)-one (**3aa**) (250 mg, 0.895 mmol, 89.2%) as a colorless oil.

*Synthesis of 2-(((1,3-dioxoisindolin-2-yl)disulfanyl)methyl)allyl 9H-fluorene-1-carboxylate (5) from N-(morpholine-4-dithio)phthalimide (2k)*

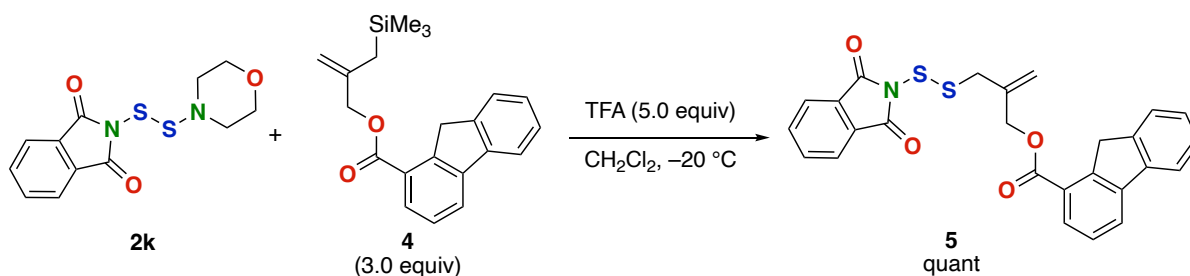

*N*-(Morpholine-4-dithio)phthalimide (**2k**) (44.7 mg, 0.151 mmol, 1.00 equiv) and 2-((trimethylsilyl)methyl)allyl 9*H*-fluorene-1-carboxylate (**4**) (151 mg, 0.449 mmol, 2.98 equiv) were dissolved in CH<sub>2</sub>Cl<sub>2</sub> (1.0 mL) at room temperature. After stirring for 10 min at −20 °C, to the mixture was added TFA (58.0 μL, 0.757 mmol, 5.02 equiv) at the same temperature. After stirring for 1 h at the same temperature, to the mixture was added aqueous saturated solution of sodium bicarbonate (7 mL). The mixture was extracted with EtOAc (7 mL × 3), washed with brine (7 mL), and dried (MgSO<sub>4</sub>). After filtration, the filtrate was concentrated under reduced pressure. The residue was purified by column chromatography (silica gel, 6 g, hexane/EtOAc = 12/1 to 2/1) to give 2-(((1,3-dioxoisindolin-2-yl)disulfanyl)methyl)allyl 9*H*-fluorene-1-carboxylate (**5**) (71.7 mg, 0.151 mmol, quant) as a colorless solid.

Synthesis of (2*S*,3*S*,4*R*,5*S*,6*R*)-2-(acetoxymethyl)-6-((1,3-dioxoisindolin-2-yl)disulfanyl)tetrahydro-2*H*-pyran-3,4,5-triyl triacetate (**9**) from *N,N'*-thiobis(phthalimide) (**7**) and 1-thio- $\beta$ -D-glucose tetraacetate (**8**)

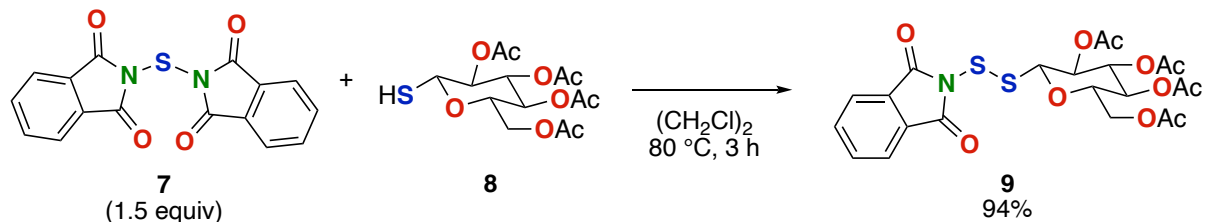

To a mixture of *N,N'*-thiobis(phthalimide) (**7**) (486 mg, 1.50 mmol, 1.50 equiv) suspended in 1,2-dichloroethane (0.5 mL) was slowly added 1-thio- $\beta$ -D-glucose tetraacetate (**8**) (365 mg, 1.00 mmol, 1.00 equiv) dissolved in 1,2-dichloroethane (5 mL) at room temperature. After stirring for 3 h at 80 °C, the mixture was concentrated under reduced pressure. The residue was diluted with EtOAc (10 mL). After filtration, the filtrate was washed with 10% aqueous solution of potassium carbonate (10 mL  $\times$  6) and brine (10 mL), and dried (MgSO<sub>4</sub>). After filtration, the filtrate was concentrated under reduced pressure, and the residue was purified by column chromatography (silica gel, 7 g, hexane/EtOAc = 4/1 to 1/1) to give (2*S*,3*S*,4*R*,5*S*,6*R*)-2-(acetoxymethyl)-6-((1,3-dioxoisindolin-2-yl)disulfanyl)tetrahydro-2*H*-pyran-3,4,5-triyl triacetate (**9**) (508 mg, 0.938 mmol, 93.6%) as a colorless solid.

Synthesis of 2-(((3-(9,10-ethanoanthracen-9(10*H*)-yl)propyl)(methylamino)disulfanyl)isoindoline-1,3-dione (**13**) from *N,N'*-dithiobis(phthalimide) (**11**)

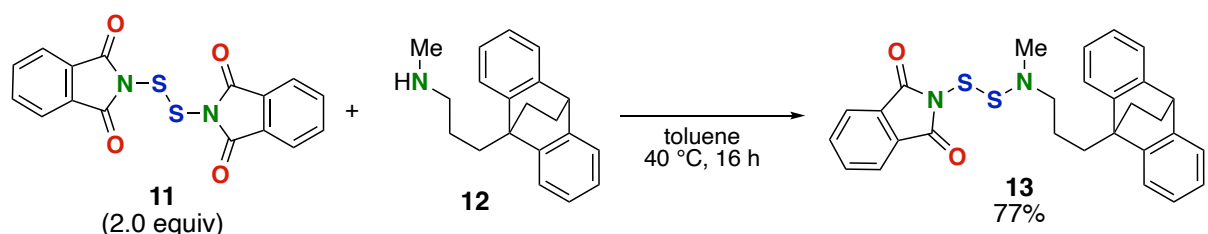

To a mixture of *N,N'*-dithiobis(phthalimide) (**11**) (71.6 mg, 0.201 mmol, 1.99 equiv) suspended in toluene (3.0 mL) was slowly added 9-( $\gamma$ -methylaminopropyl)-9,10-dihydro-9,10-ethanoanthracene (maprotiline) (**12**) (28.0 mg, 0.101 mmol, 1.00 equiv) dissolved in toluene (1.0 mL) at 40 °C. After stirring for 16 h at the same temperature, the mixture was concentrated under reduced pressure. The residue was purified by column chromatography (silica gel, 20 g, hexane/EtOAc = 6/1 to 4/1) to give 2-(((3-(9,10-ethanoanthracen-9(10*H*)-yl)propyl)(methylamino)disulfanyl)isoindoline-1,3-dione (**13**) (38.0 mg, 78.1  $\mu$ mol, 77.4%) as a colorless solid.

*Transformation to carboxylic acid via the acid-mediated ring-opening*

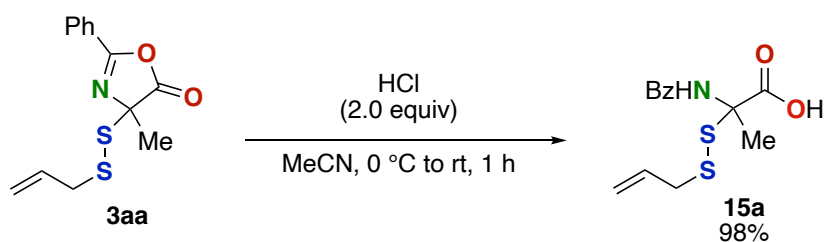

To a mixture of 4-(allyldisulfanyl)-4-methyl-2-phenyloxazol-5(4H)-one (**3aa**) (422 mg, 1.51 mmol, 1.00 equiv) dissolved in CH<sub>2</sub>Cl<sub>2</sub> (1.0 mL) was slowly added 12 M HCl aq. (250 μL, 3.00 mmol, 1.99 equiv) at 0 °C. After stirring for 1 h at room temperature, the mixture was concentrated under reduced pressure. The residue was purified by column chromatography (silica gel, 2 g, hexane/EtOAc = 1/1) to give 2-(allyldisulfanyl)-2-benzamidopropanoic acid (**15a**) (441 mg, 1.48 mmol, 98.2%) as a colorless oil.

*Transformation to methyl ester via the ring-opening by NaOMe*

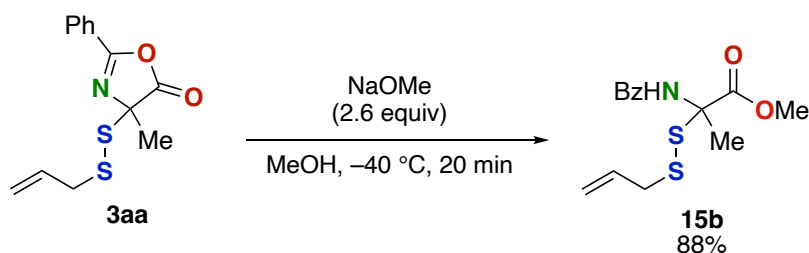

To a mixture of 4-(allyldisulfanyl)-4-methyl-2-phenyloxazol-5(4H)-one (**3aa**) (28.3 mg, 0.101 mmol, 1.00 equiv) dissolved in MeOH (0.5 mL) was slowly added sodium methoxide (14.1 mg, 0.261 mmol, 2.58 equiv) in MeOH (0.75 mL) at -40 °C. After stirring for 20 min at same temperature, to the mixture was added aqueous saturated solution of ammonium chloride (7 mL). The mixture was extracted with EtOAc (7 mL × 3), washed with brine (7 mL), and dried (MgSO<sub>4</sub>). After filtration, the filtrate was concentrated under reduced pressure. The residue was purified by column chromatography (silica gel, 5 g, hexane/EtOAc = 20/1 to 8/1) to give methyl 2-(allyldisulfanyl)-2-benzamidopropanoate (**15b**) (27.6 mg, 88.6 μmol, 87.5%) as a colorless oil.

*Transformation to ester via the acid-catalyzed ring-opening by the sugar*

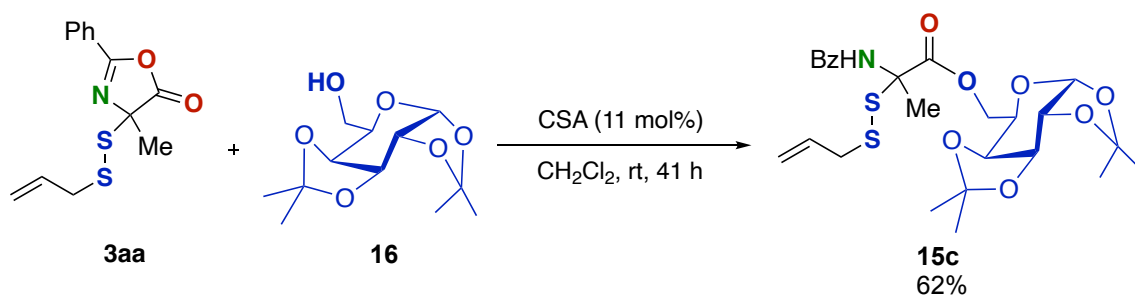

((3*aR*,5*R*,5*aS*,8*aS*,8*bR*)-2,2,7,7-Tetramethyltetrahydro-5*H*-bis([1,3]dioxolo)[4,5-*b*:4',5'-*d*]pyran-5-yl)methanol (**16**) (52.3 mg, 0.201 mmol) was dissolved in dry CH<sub>2</sub>Cl<sub>2</sub> (1.0 mL) at room temperature and stirred for 10 minutes to prepare stock solution. (4-(Allyldisulfanyl)-4-methyl-2-phenyloxazol-5(4*H*)-one (**3aa**) (14.3 mg, 51.2 μmol, 1.00 equiv) and (-)-10-camphorsulfonic acid (1.3 mg, 5.6 μmol, 11 mol%) were dissolved in 0.25 mL of the stock solution. After stirring for 41 hours at room temperature, to the mixture was added aqueous saturated solution of sodium bicarbonate (5 mL). The mixture was washed with aqueous saturated solution of sodium bicarbonate (5 mL), and dried (MgSO<sub>4</sub>). After filtration, the filtrate was concentrated under reduced pressure. The residue was purified by column chromatography (silica gel, 2 g, hexane/EtOAc = 10/1 to 1/1) to give ((3*aR*,5*R*,5*aS*,8*aS*,8*bR*)-2,2,7,7-tetramethyltetrahydro-5*H*-bis([1,3]dioxolo)[4,5-*b*:4',5'-*d*]pyran-5-yl)methyl 2-(allyldisulfanyl)-2-benzamidopropanoate (**15c**) (17.0 mg, 31.5 μmol, 61.5%, 1:1 dr) as a colorless oil.

*Transformation to amide via the ring-opening by the amine*

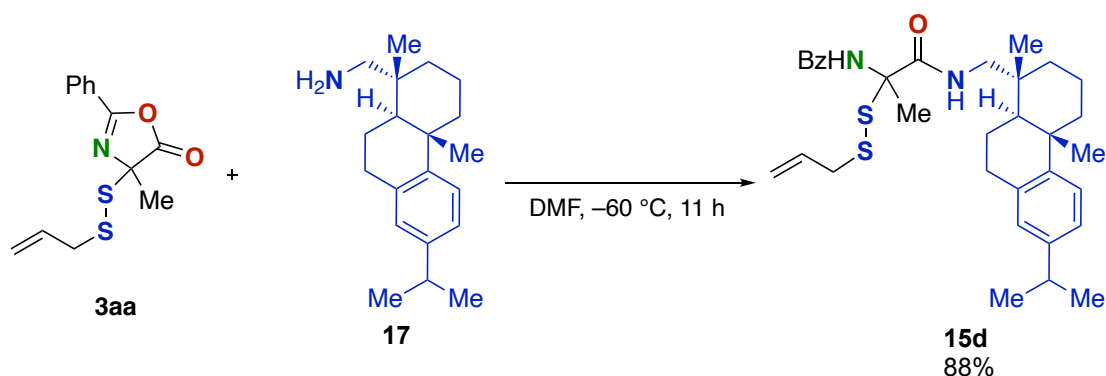

4-(Allyldisulfanyl)-4-methyl-2-phenyloxazol-5(4*H*)-one (**3aa**) (14.2 mg, 50.8 μmol, 1.00 equiv) was dissolved in DMF (0.5 mL) at -60 °C. After stirring for 20 min at -60 °C, to the mixture was added ((1*R*,4*aS*,10*aR*)-7-isopropyl-1,4*a*-dimethyl-1,2,3,4,4*a*,9,10,10*a*-octahydrophenanthren-1-yl)methanamine (**17**) (14.6 mg, 51.1 μmol, 1.01 equiv) at the same temperature. After stirring for 11 h at the same temperature, to the mixture was added aqueous saturated solution of ammonium chloride (5 mL). The mixture was extracted with EtOAc (5 mL × 3), washed with brine (5 mL), and dried (MgSO<sub>4</sub>). After filtration, the filtrate was concentrated under reduced pressure. The residue was purified by column chromatography (silica gel, 2 g, hexane/EtOAc = 30:1 to 1/1) to give *N*-(2-(allyldisulfanyl)-1-(((1*R*,4*aS*,10*aR*)-7-isopropyl-1,4*a*-dimethyl-1,2,3,4,4*a*,9,10,10*a*-octahydrophenanthren-1-yl)methyl)amino)-1-oxopropan-2-yl)benzamide (**15d**) (25.2 mg, 44.6 μmol, 87.8%, 1:1 dr) as a colorless oil.

According to the procedure for preparing *N*-(2-(allyldisulfanyl)-1-(((1*R*,4*aS*,10*aR*)-7-isopropyl-1,4*a*-dimethyl-1,2,3,4,4*a*,9,10,10*a*-octahydrophenanthren-1-yl)methyl)amino)-1-oxopropan-2-yl)benzamide (**15d**), *N*-(2-(allyldisulfanyl)-1-(butylamino)-4-(methylthio)-1-oxobutan-2-yl)benzamide (**15e**) (39.3 mg, 93.9%) was prepared from 4-(allyldisulfanyl)-4-(2-(methylthio)ethyl)-2-phenyloxazol-5(4*H*)-one (**3ba**) and butylamine.



Synthesis of (5*R*,5*aR*,8*aR*,9*R*)-8-oxo-9-(3,4,5-trimethoxyphenyl)-5,5*a*,6,8,8*a*,9-hexahydrofuro[3',4':6,7]naphtho[2,3-*d*][1,3]dioxol-5-yl 2-(2-((1,3-dioxoisindolin-2-yl)disulfanyl)phenyl)acetate from *N,N'*-thiobis(phthalimide) (**7**)

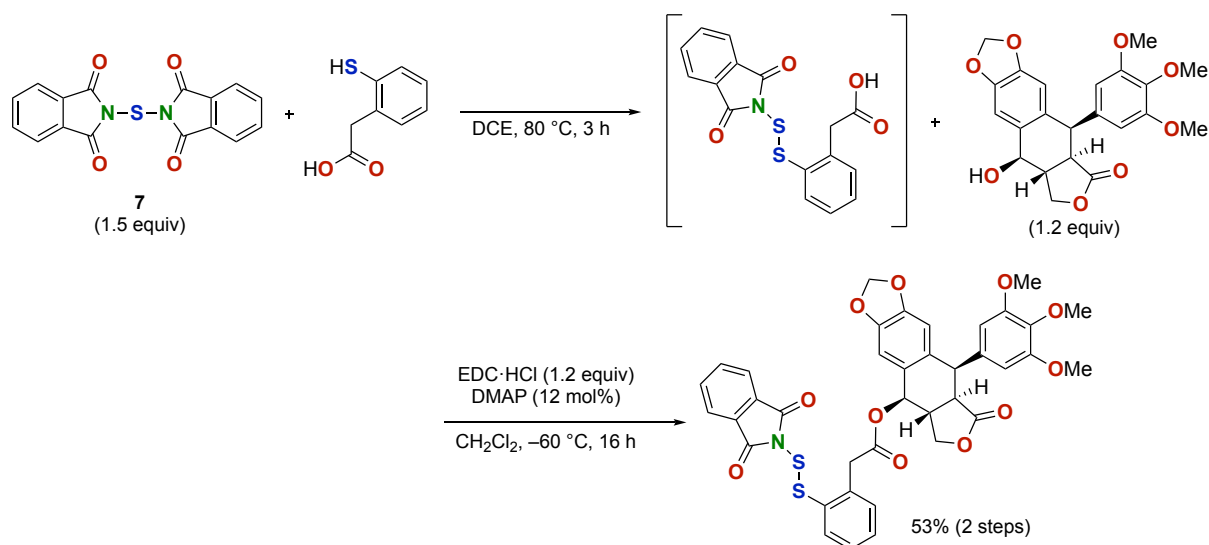

To a mixture of *N,N'*-thiobis(phthalimide) (**7**) (488 mg, 1.50 mmol, 1.49 equiv) suspended in 1,2-dichloroethane (5 mL) was slowly added 2-(2-mercaptophenyl)acetic acid (171 mg, 1.02 mmol, 1.00 equiv) at room temperature. After stirring for 3 h at 80 °C, the mixture was filtered, and the filtrate was concentrated under reduced pressure to obtain the crude 2-(2-((1,3-dioxoisindolin-2-yl)disulfanyl)phenyl)acetic acid. To a mixture of the crude 2-(2-((1,3-dioxoisindolin-2-yl)disulfanyl)phenyl)acetic acid and (5*R*,5*aR*,8*aR*,9*R*)-9-hydroxy-5-(3,4,5-trimethoxyphenyl)-5,8,8*a*,9-tetrahydrofuro[3',4':6,7]naphtho[2,3-*d*][1,3]dioxol-6(5*aH*)-one (506 mg, 1.22 mmol, 1.20 equiv) dissolved in CH<sub>2</sub>Cl<sub>2</sub> (5 mL) were added EDC·HCl (230 mg, 1.20 mmol, 1.18 equiv) and DMAP (15.3 mg, 0.125 mmol, 12.3 mol%) at -60 °C. After stirring for 16 h at the same temperature, to the mixture was added aqueous saturated solution of sodium bicarbonate (15 mL). The mixture was extracted with EtOAc (15 mL × 3), washed with brine (15 mL), and dried (MgSO<sub>4</sub>). After filtration, the filtrate was concentrated under reduced pressure. The residue was purified by column chromatography (silica gel, 15 g, hexane/EtOAc = 5/1 to 1/1) to give (5*R*,5*aR*,8*aR*,9*R*)-8-oxo-9-(3,4,5-trimethoxyphenyl)-5,5*a*,6,8,8*a*,9-hexahydrofuro[3',4':6,7]naphtho[2,3-*d*][1,3]dioxol-5-yl 2-(2-((1,3-dioxoisindolin-2-yl)disulfanyl)phenyl)acetate (398 mg, 0.537 mmol, 52.8%) as a yellow solid.

Synthesis of (5*R*,5*aR*,8*aR*,9*R*)-8-oxo-9-(3,4,5-trimethoxyphenyl)-5,5*a*,6,8,8*a*,9-hexahydrofuro[3',4':6,7]naphtho[2,3-*d*][1,3]dioxol-5-yl 2-(2-((4-methyl-5-oxo-2-phenyl-4,5-dihydrooxazol-4-yl)disulfanyl)phenyl)acetate (**18**) from (5*R*,5*aR*,8*aR*,9*R*)-8-oxo-9-(3,4,5-trimethoxyphenyl)-5,5*a*,6,8,8*a*,9-hexahydrofuro[3',4':6,7]naphtho[2,3-*d*][1,3]dioxol-5-yl 2-((1,3-dioxoisoindolin-2-yl)disulfanyl)phenyl)acetate

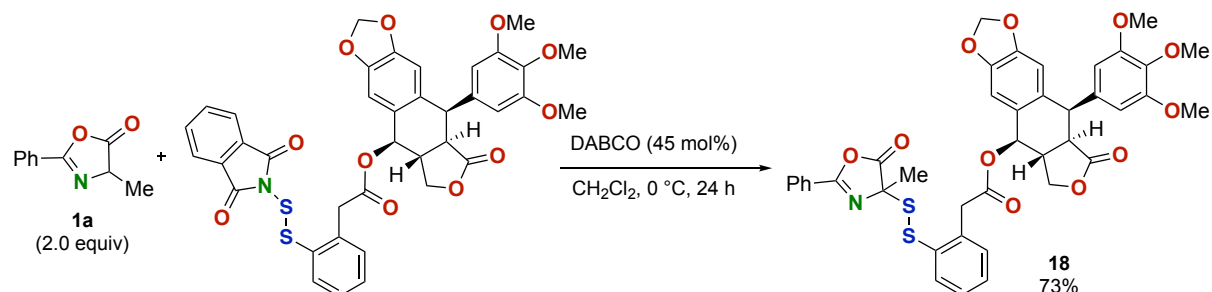

To a mixture of 4-methyl-2-phenyloxazol-5(4*H*)-one (**1a**) (34.3 mg, 0.196 mmol, 1.96 equiv) and (5*R*,5*aR*,8*aR*,9*R*)-8-oxo-9-(3,4,5-trimethoxyphenyl)-5,5*a*,6,8,8*a*,9-hexahydrofuro[3',4':6,7]naphtho[2,3-*d*][1,3]dioxol-5-yl 2-((1,3-dioxoisoindolin-2-yl)disulfanyl)phenyl)acetate (74.2 mg, 0.100 mmol, 1.00 equiv) dissolved in CH<sub>2</sub>Cl<sub>2</sub> (1.0 mL) was added DABCO (5.0 mg, 45 μmol, 45 mol%) at 0 °C. After stirring for 24 h at the same temperature, to the mixture was added aqueous saturated solution of ammonium chloride (7 mL). The mixture was extracted with EtOAc (5 mL × 3), washed with brine (7 mL), and dried (MgSO<sub>4</sub>). After filtration, the filtrate was concentrated under reduced pressure. The residue was purified by column chromatography (silica gel, 2 g, hexane/EtOAc = 5/1 to 1/1) to give (5*R*,5*aR*,8*aR*,9*R*)-8-oxo-9-(3,4,5-trimethoxyphenyl)-5,5*a*,6,8,8*a*,9-hexahydrofuro[3',4':6,7]naphtho[2,3-*d*][1,3]dioxol-5-yl 2-(2-((4-methyl-5-oxo-2-phenyl-4,5-dihydrooxazol-4-yl)disulfanyl)phenyl)acetate (**18**) (56.2 mg, 73.0 μmol, 73.0%, 1.7:1 dr) as a colorless solid.

Transformation to SMDC (**20**) via the ring-opening by benzyl ((benzyloxy)carbonyl)-*L*-lysinate *p*-toluenesulfonate (**19**)

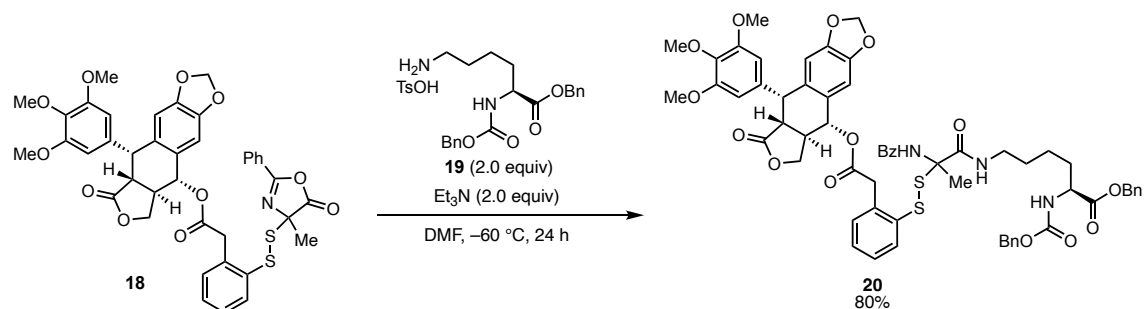

To a mixture of (5*R*,5*aR*,8*aR*,9*R*)-8-oxo-9-(3,4,5-trimethoxyphenyl)-5,5*a*,6,8,8*a*,9-hexahydrofuro[3',4':6,7]naphtho[2,3-*d*][1,3]dioxol-5-yl 2-(2-((4-methyl-5-oxo-2-phenyl-4,5-dihydrooxazol-4-yl)disulfanyl)phenyl)acetate (**18**) (38.5 mg, 50.0 μmol, 1.00 equiv) dissolved in DMF (1.0 mL) was added benzyl ((benzyloxy)carbonyl)-*L*-lysinate *p*-toluenesulfonate (**19**) (54.5 mg, 0.10 mmol, 2.0 equiv) at -60 °C. After stirring for 15 minutes, Et<sub>3</sub>N (13.8 μL, 0.10 mmol, 2.0 equiv) was added at -60 °C. After stirring for 24 h at the same temperature, the mixture was concentrated under reduced pressure. The residue was purified by column chromatography (silica gel, 3 g, hexane/EtOAc = 5/1 to 1/1) to give benzyl *N*<sup>6</sup>-(2-benzamido-

2-((2-(2-oxo-2-(((5*R*,5*aR*,8*aR*,9*R*)-8-oxo-9-(3,4,5-trimethoxyphenyl)-5,5*a*,6,8,8*a*,9-hexahydrofuro[3',4':6,7]naphtho[2,3-*d*][1,3]dioxol-5-yl)oxy)ethyl)phenyl)disulfanyl)propanoyl)-*N*<sup>2</sup>-((benzyloxy)carbonyl)-*L*-lysinate (**20**) (45.6 mg, 40.0  $\mu$ mol, 80%, 1.3:1 dr) as a yellow oil.

*A typical procedure for the synthesis of SS-linked peptides via ring opening by amino acid or peptide*

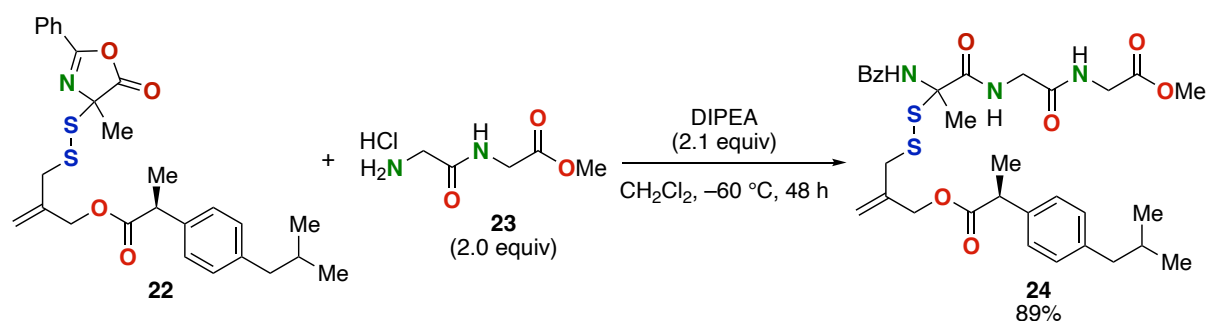

To a mixture of 2-(((4-methyl-5-oxo-2-phenyl-4,5-dihydrooxazol-4-yl)disulfanyl)methyl)allyl (2*S*)-2-(4-isobutylphenyl)propanoate (**22**) (50.2 mg, 0.101 mmol, 1.00 equiv) and glycylglycine methyl ester hydrochloride (**23**) (36.5 mg, 0.200 mmol, 1.98 equiv) suspended in CH<sub>2</sub>Cl<sub>2</sub> (1.0 mL) was added DIPEA (37.5  $\mu$ L, 0.215 mmol, 2.13 equiv) at  $-60$  °C. After stirring for 48 h at the same temperature, the mixture was concentrated under reduced pressure. The residue was diluted with EtOAc (7 mL). The mixture was washed with aqueous saturated solution of ammonium chloride (7 mL), extracted with EtOAc (7 mL  $\times$  3) and brine (7 mL), and dried (MgSO<sub>4</sub>). After filtration, the filtrate was concentrated under the reduced pressure, and the residue was purified by column chromatography (silica gel, 7 g, CHCl<sub>3</sub>/MeOH = 100/1 to 40/1) to give 10-benzamido-10-methyl-14-methylene-3,6,9-trioxo-2-oxa-11,12-dithia-5,8-diazapentadecan-15-yl (2*S*)-2-(4-isobutylphenyl)propanoate (**24**) (57.5 mg, 89.3  $\mu$ mol, 88.5%, 1:1 dr) as a colorless oil.

According to the procedure for preparing 10-benzamido-10-methyl-14-methylene-3,6,9-trioxo-2-oxa-11,12-dithia-5,8-diazapentadecan-15-yl (2*S*)-2-(4-isobutylphenyl)propanoate (**24**), methyl (2-(allyldisulfanyl)-2-(2-((*tert*-butoxycarbonyl)amino)acetamido)-3-phenylpropanoyl)glycinate (**26**) (25.9 mg, 82.4%) was prepared from the corresponding *SS*-linked azlactones.

### Further peptide elongation

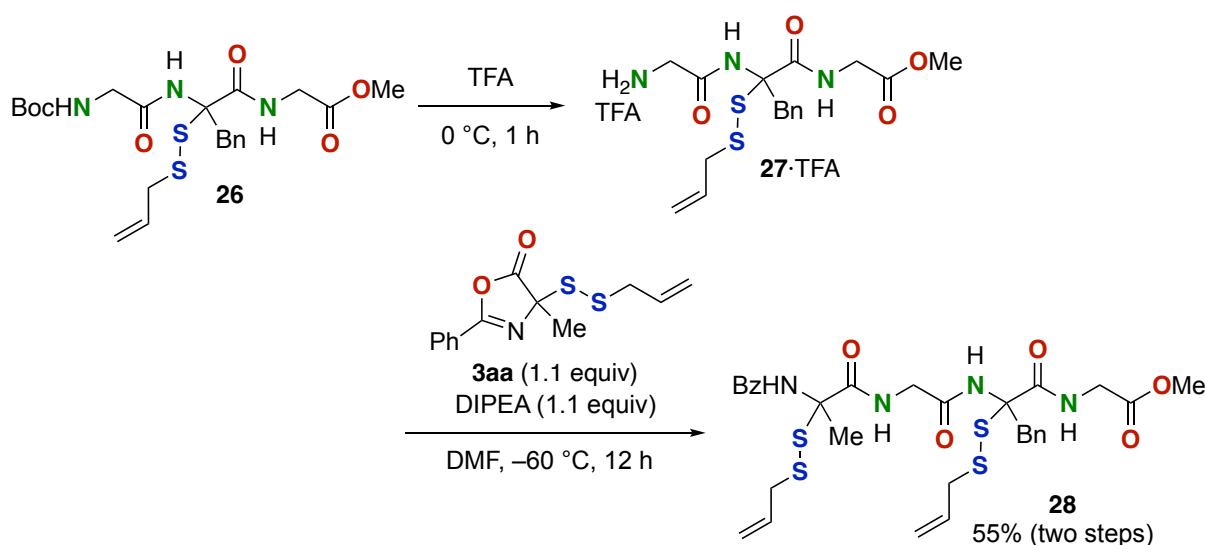

Methyl (2-(allyldisulfanyl)-2-(2-((*tert*-butoxycarbonyl)amino)acetamido)-3-phenylpropanoyl)glycinate (**26**) (220 mg, 0.442 mmol, 1.00 equiv) was dissolved in TFA (0.52 mL) at 0 °C. After stirring for 1 hour at the same temperature, the mixture was concentrated under reduced pressure to give TFA salt of methyl (2-(allyldisulfanyl)-2-(2-aminoacetamido)-3-phenylpropanoyl)glycinate (**27**·TFA) (218 mg) as an orange oil. The crude **27**·TFA was used in the next transformation without further purification.

To a mixture of TFA salt of methyl (2-(allyldisulfanyl)-2-(2-aminoacetamido)-3-phenylpropanoyl)glycinate (**27**·TFA) (23.3 mg, 45.6  $\mu$ mol, 1.00 equiv) dissolved in DMF (0.46 mL) was added DIPEA (8.50  $\mu$ L, 48.8  $\mu$ mol, 1.07 equiv) at -60 °C. After stirring for 15 min at the same temperature, to the mixture was added 4-(allyldisulfanyl)-4-methyl-2-phenyloxazol-5(4*H*)-one (**3aa**) (14.3 mg, 51.2  $\mu$ mol, 1.12 equiv) at the same temperature. After stirring for 12 h at the same temperature, to the mixture was added aqueous saturated solution of ammonium chloride (5 mL). The mixture was extracted with EtOAc (5 mL  $\times$  2), washed with brine (5 mL), and dried (MgSO<sub>4</sub>). After filtration, the filtrate was concentrated under reduced pressure. The residue was purified by column chromatography (silica gel, 2 g, CHCl<sub>3</sub>/MeOH = 70/1 to 20/1) to give methyl (2-(allyldisulfanyl)-2-(2-(2-(allyldisulfanyl)-2-benzamidopropanamido)acetamido)-3-phenylpropanoyl)glycinate (**28**) (17.6 mg, 26.0  $\mu$ mol, 55.0%, 1.1 dr (two step yield)) as a colorless oil.

### Synthesis of SS-linked oligopeptides via ring-opening by oligopeptides

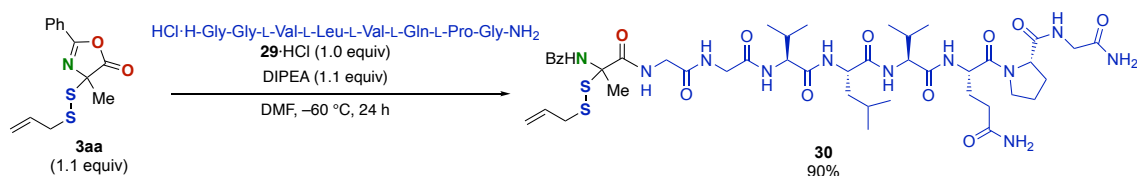

4-(Allyldisulfanyl)-4-methyl-2-phenyloxazol-5(4*H*)-one (**3aa**) (6.2 mg, 0.022 mmol) was dissolved in dry DMF (100  $\mu$ L) at -60 °C and stirred for 10 minutes to prepare stock solution. To a solution of H-Gly-Gly-L-Val-L-Leu-L-Val-L-Gln-L-Pro-Gly-NH<sub>2</sub>·HCl (**29**·HCl) (3.8 mg, 5.0  $\mu$ mmol, 1.0 equiv) and DIPEA (0.95  $\mu$ L, 5.5  $\mu$ mmol, 1.1 equiv) dissolved in dry DMF (25.0  $\mu$ L) was added 25.0  $\mu$ L of the stock solution at -60 °C. After stirring for 24 hours at the same temperature, the mixture was concentrated under reduced pressure. The residue was

purified by column chromatography (silica gel, 2 g, CHCl<sub>3</sub>/MeOH = 100/1 to 1/1) to give (2*S*)-1-((2-(allyldisulfanyl)-2-benzamidopropanoyl)glycylglycyl-L-valyl-L-leucyl-L-valyl-L-glutaminy)-*N*-(2-amino-2-oxoethyl)pyrrolidine-2-carboxamide (**30**) (4.5 mg, 4.5 μmol, 90%, 1.1:1 dr) as a colorless solid.

#### A typical procedure for the synthesis of azlactones **1**

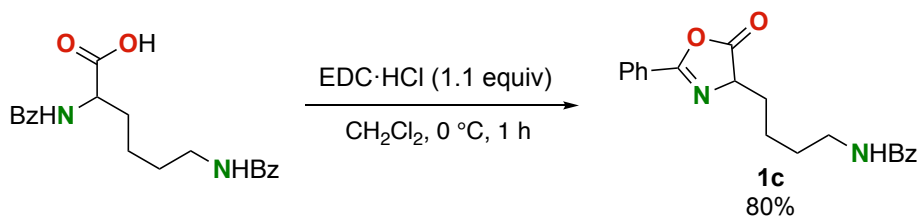

To a mixture of Bz-Lys(Bz)-OH (355 mg, 1.00 mmol, 1.00 equiv) dissolved in CH<sub>2</sub>Cl<sub>2</sub> (10 mL) was added EDC·HCl (212 mg, 1.11 mmol, 1.10 equiv) at 0 °C. After stirring for 1 h at the same temperature, to the mixture was added CH<sub>2</sub>Cl<sub>2</sub> (10 mL), washed with aqueous saturated solution of NaHCO<sub>3</sub> (10 mL × 2), H<sub>2</sub>O (10 mL), brine (10 mL), and dried (MgSO<sub>4</sub>). After filtration, the filtrate was concentrated under reduced pressure to give *N*-(4-(5-oxo-2-phenyl-4,5-dihydrooxazol-4-yl)butyl)benzamide (**1c**) (270 mg, 0.803 mmol, 80.1%) as a colorless solid.

According to the procedure for preparing *N*-(4-(5-oxo-2-phenyl-4,5-dihydrooxazol-4-yl)butyl)benzamide (**1c**), *tert*-butyl ((4-benzyl-5-oxo-4,5-dihydrooxazol-2-yl)methyl)carbamate (**1k**) (914 mg, 3.00 mmol, quant) was prepared from the corresponding peptide.

#### Synthesis of peptide-based *N*-dithiophthalimide **2l**

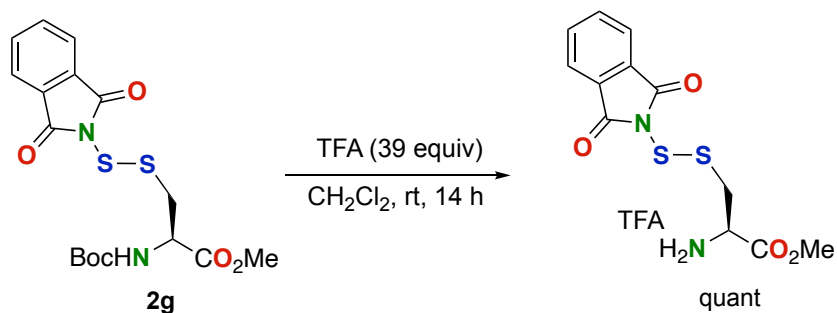

To a mixture of methyl *N*-(*tert*-butoxycarbonyl)-*S*-((1,3-dioxoisindolin-2-yl)thio)-*L*-cysteinate (**2g**) (207 mg, 0.502 mmol, 1.00 equiv) dissolved in CH<sub>2</sub>Cl<sub>2</sub> (8 mL) was added TFA (1.5 mL, 19.6 mmol, 39.1 equiv) at 0 °C. After stirring for 14 h at room temperature, the mixture was concentrated under reduced pressure to give TFA salt of methyl *S*-((1,3-dioxoisindolin-2-yl)thio)-*L*-cysteinate (237 mg, 0.555 mmol, quant) as a brown oil.

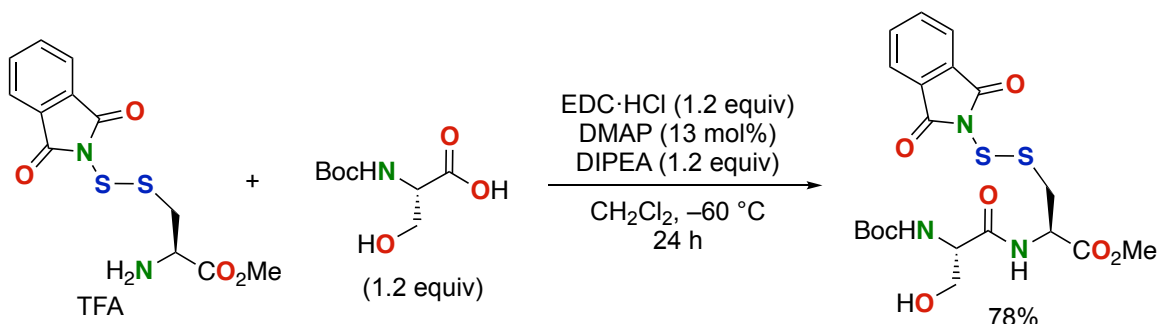

To a mixture of TFA salt of methyl *S*-((1,3-dioxoisindolin-2-yl)thio)-*L*-cysteinate (429 mg, 1.00 mmol, 1.00 equiv) and Boc-*L*-Ser-OH (250 mg, 1.22 mmol, 1.21 equiv) suspended in CH<sub>2</sub>Cl<sub>2</sub> (5 mL) were added DMAP (15.9 mg, 0.130 mmol, 12.9 mol%), EDC·HCl (232 mg, 1.21 mmol, 1.20 equiv), and DIPEA (0.21 mL, 1.2 mmol, 1.2 equiv) at -60 °C. After stirring for 24 h at the same temperature, the mixture was diluted with EtOAc (15 mL), washed with H<sub>2</sub>O (10 mL), extracted with EtOAc (15 mL × 2), washed with brine (30 mL), and dried (MgSO<sub>4</sub>). After filtration, the filtrate was concentrated under the reduced pressure, and the residue was purified by column chromatography (silica gel, 5 g, hexane/EtOAc = 4/1 then CHCl<sub>3</sub>/MeOH = 40/1) to give methyl *N*-((*tert*-butoxycarbonyl)-*L*-seryl)-*S*-((1,3-dioxoisindolin-2-yl)thio)-*L*-cysteinate (390 mg, 0.782 mmol, 77.7%) as a colorless solid.

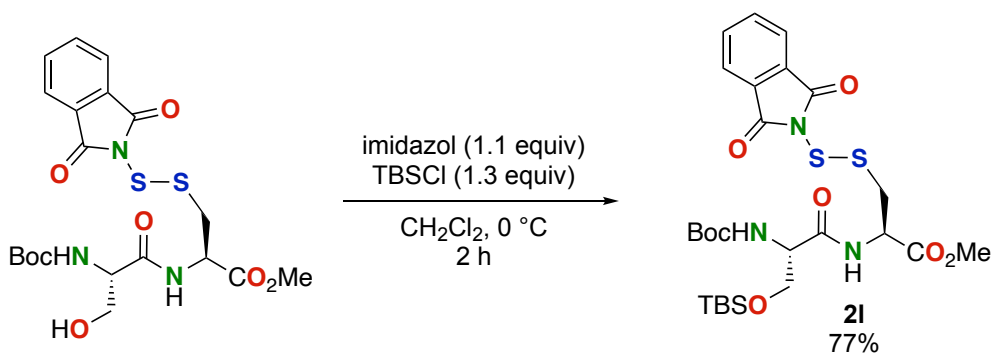

To a mixture of methyl *N*-((*tert*-butoxycarbonyl)-*L*-seryl)-*S*-((1,3-dioxoisindolin-2-yl)thio)-*L*-cysteinate (322 mg, 0.645 mmol, 1.00 equiv) dissolved in CH<sub>2</sub>Cl<sub>2</sub> (2.9 mL) were added imidazole (48.7 mg, 0.715 mmol, 1.11 equiv) and TBSCl (127 mg, 0.840 mmol, 1.30 equiv) at 0 °C. After stirring for 2 h at the same temperature, the mixture was added H<sub>2</sub>O (10 mL), extracted with EtOAc (10 mL × 3), washed with brine (15 mL), and dried (MgSO<sub>4</sub>). After filtration, the filtrate was concentrated under the reduced pressure, and the residue was purified by column chromatography (silica gel, 6 g, hexane/EtOAc = 1/4 then CHCl<sub>3</sub>/MeOH = 40/1) to give methyl *N*-(*N*-((*tert*-butoxycarbonyl)-*O*-((*tert*-butyldimethylsilyl)-*L*-seryl)-*S*-((1,3-dioxoisindolin-2-yl)thio)-*L*-cysteinate (**21**) (303 mg, 0.494 mmol, 76.6%) as a colorless solid.

*Synthesis of 2-((trimethylsilyl)methyl)allyl 9H-fluorene-1-carboxylate (4) from (2-(chloromethyl)allyl)trimethylsilane and 9H-fluorene-1-carboxylic acid*

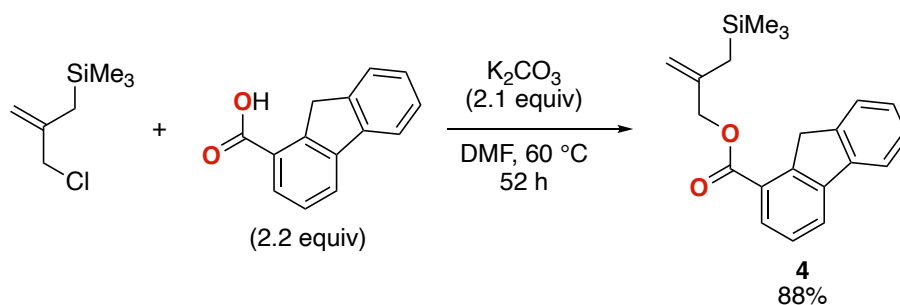

To a mixture of 9H-fluorene-1-carboxylic acid (367 mg, 1.75 mmol, 2.18 equiv) and potassium carbonate (237 mg, 1.71 mmol, 2.14 equiv) suspended in DMF (5.6 mL) was added (2-(chloromethyl)allyl)trimethylsilane (145  $\mu$ L, 0.801 mmol, 1.00 equiv) at room temperature. After stirring for 52 h at 60 °C, to the mixture was added H<sub>2</sub>O (10 mL). The mixture was extracted with EtOAc (10 mL  $\times$  3), the combined organic extract was washed with H<sub>2</sub>O (15 mL  $\times$  3) and brine (15 mL), and dried (MgSO<sub>4</sub>). After filtration, the filtrate was concentrated under reduced pressure. The residue was purified by column chromatography (silica gel, 9 g, hexane/EtOAc = 80/1 to 20/1) to give 2-((trimethylsilyl)methyl)allyl 9H-fluorene-1-carboxylate (**4**) (238 mg, 0.707 mmol, 88.3%) as a colorless oil.

## Characterization Data of New Compounds

*tert*-Butyl ((4-benzyl-5-oxo-4,5-dihydrooxazol-2-yl)methyl)carbamate (**1k**)<sup>S13</sup>, (2*S*,3*S*,4*R*,5*S*,6*R*)-2-(acetoxymethyl)-6-((1,3-dioxoisindolin-2-yl)disulfanyl)tetrahydro-2*H*-pyran-3,4,5-triyl triacetate (**9**)<sup>S9</sup>, and 2-(((3-(9,10-ethanoanthracen-9(10*H*)-yl)propyl)(methyl)amino)disulfanyl)isoindoline-1,3-dione (**13**)<sup>S8</sup> were identical in spectra data with those reported in the literature.

### *N*-(4-(5-Oxo-2-phenyl-4,5-dihydrooxazol-4-yl)butyl)benzamide (**1c**)

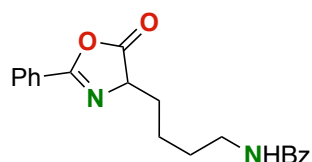

Colorless solid; TLC  $R_f$  0.32 (CHCl<sub>3</sub>/MeOH = 30/1); m.p. 113-115 °C; <sup>1</sup>H NMR (400 MHz, CDCl<sub>3</sub>) δ 8.01-7.97 (m, 2H), 7.76-7.74 (m, 2H), 7.61-7.56 (m, 1H), 7.51-7.46 (m, 3H), 7.44-7.38 (m, 2H), 6.26 (br s, 1H), 4.42 (dd,  $J = 7.4, 5.6$  Hz, 1H), 3.54-3.46 (m, 2H), 2.14-2.04 (m, 1H), 1.96-1.82 (m, 1H), 1.76-1.68 (m, 2H), 1.65-1.57 (m, 2H); <sup>13</sup>C{<sup>1</sup>H} NMR (101 MHz, CDCl<sub>3</sub>) δ 178.3, 167.6, 161.8, 134.7, 132.8, 131.4, 128.8, 128.5, 127.9, 126.8, 125.8, 65.2, 39.6, 31.1, 29.1, 22.8; HRMS (FAB<sup>+</sup>) Calcd for C<sub>20</sub>H<sub>21</sub>N<sub>2</sub>O<sub>3</sub><sup>+</sup> [M+H]<sup>+</sup> 337.1547, found 337.1549.v

### 4-(Allyldisulfanyl)-4-methyl-2-phenyloxazol-5(4*H*)-one (**3aa**)

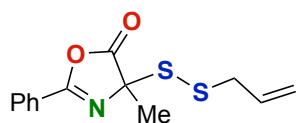

Colorless oil; TLC  $R_f$  0.40 (hexane/EtOAc = 4/1); <sup>1</sup>H NMR (400 MHz, CDCl<sub>3</sub>) δ 8.09-8.06 (m, 2H), 7.65-7.61 (m, 1H), 7.53 (app. t,  $J = 7.9$  Hz, 2H), 5.72-5.61 (m, 1H), 5.11-5.05 (m, 2H), 3.32 (d,  $J = 7.6$  Hz, 2H), 1.85 (s, 3H); <sup>13</sup>C{<sup>1</sup>H} NMR (150 MHz, CDCl<sub>3</sub>) δ 177.0, 161.6, 133.3, 132.0, 129.0, 128.3, 125.3, 119.7, 76.7, 42.8, 21.0; HRMS (FAB<sup>+</sup>) Calcd for C<sub>13</sub>H<sub>14</sub>NO<sub>2</sub>S<sub>2</sub><sup>+</sup> [M+H]<sup>+</sup> 280.0460, found 280.0471.

### 4-(Allyldisulfanyl)-4-(2-(methylthio)ethyl)-2-phenyloxazol-5(4*H*)-one (**3ba**)

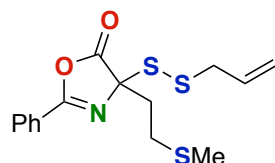

Colorless oil; TLC  $R_f$  0.32 (hexane/EtOAc = 8/1); <sup>1</sup>H NMR (400 MHz, CDCl<sub>3</sub>) δ 8.10-8.05 (m, 2H), 7.66-7.60 (m, 1H), 7.56-7.50 (m, 2H), 5.71-5.60 (m, 1H), 5.12-5.03 (m, 2H), 3.33-3.27 (m, 2H), 2.67-2.40 (m, 4H), 2.06 (s, 3H); <sup>13</sup>C{<sup>1</sup>H} NMR (101 MHz, CDCl<sub>3</sub>) δ 176.8, 162.5, 133.5, 132.0, 129.1, 128.4, 125.4, 119.9, 79.5, 42.9, 33.5, 29.7, 15.1; HRMS (FAB<sup>+</sup>) Calcd for C<sub>15</sub>H<sub>18</sub>NO<sub>2</sub>S<sub>3</sub><sup>+</sup> [M+H]<sup>+</sup> 340.0494, found 340.0501.



***N*-(4-(4-(Allyldisulfanyl)-5-oxo-2-phenyl-4,5-dihydrooxazol-4-yl)butyl)benzamide (3ca)**

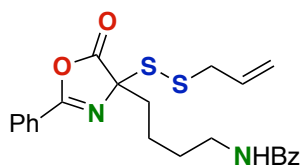

Colorless oil; TLC  $R_f$  0.20 (hexane/EtOAc = 2/1);  $^1\text{H NMR}$  (400 MHz,  $\text{CDCl}_3$ )  $\delta$  8.09-8.01 (m, 2H), 7.75-7.68 (m, 2H), 7.66-7.59 (m, 1H), 7.52 (app. t,  $J = 7.8$  Hz, 2H), 7.48-7.43 (m, 1H), 7.39 (app. t,  $J = 7.8$  Hz, 2H), 6.36 (t,  $J = 5.7$  Hz, 1H), 5.70-5.57 (m, 1H), 5.11-5.01 (m, 2H), 3.41 (dd,  $J = 13.1, 6.8$  Hz, 2H), 3.29 (d,  $J = 7.4$  Hz, 2H), 2.19 (t,  $J = 8.7$  Hz, 2H), 1.72-1.61 (m, 2H), 1.61-1.34 (m, 2H);  $^{13}\text{C}\{^1\text{H}\}$  NMR (101 MHz,  $\text{CDCl}_3$ )  $\delta$  176.7, 167.7, 162.0, 134.7, 133.5, 132.0, 131.5, 129.1, 128.6, 128.4, 126.9, 125.2, 119.8, 80.6, 43.0, 39.6, 34.1, 29.3, 22.5; HRMS (FAB $^+$ ) Calcd for  $\text{C}_{23}\text{H}_{25}\text{N}_2\text{O}_3\text{S}_2^+$   $[\text{M}+\text{H}]^+$  441.1301, found 441.1320.

**4-(Allyldisulfanyl)-4-isobutyl-2-phenyloxazol-5(4*H*)-one (3da)**

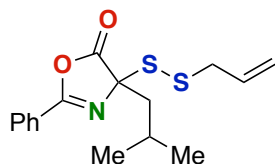

Colorless oil; TLC  $R_f$  0.37 (hexane/EtOAc = 10/1);  $^1\text{H NMR}$  (400 MHz,  $\text{CDCl}_3$ )  $\delta$  8.11-8.07 (m, 2H), 7.66-7.60 (m, 1H), 7.56-7.51 (m, 2H), 5.70-5.59 (m, 1H), 5.10-5.02 (m, 2H), 3.28 (d,  $J = 7.6$  Hz, 2H), 2.18-2.06 (m, 2H), 1.84 (sep,  $J = 6.7$  Hz, 1H), 0.95 (d,  $J = 6.7$  Hz, 3H), 0.89 (d,  $J = 6.7$  Hz, 3H);  $^{13}\text{C}\{^1\text{H}\}$  NMR (101 MHz,  $\text{CDCl}_3$ )  $\delta$  177.3, 161.5, 133.4, 132.2, 129.1, 128.4, 125.6, 119.7, 80.5, 43.1, 42.9, 26.4, 23.7, 22.9; HRMS (FAB $^+$ ) Calcd for  $\text{C}_{16}\text{H}_{20}\text{NO}_2\text{S}_2^+$   $[\text{M}+\text{H}]^+$  321.0930, found 321.0939.

**4-(Allyldisulfanyl)-4-benzyl-2-phenyloxazol-5(4*H*)-one (3ea)**

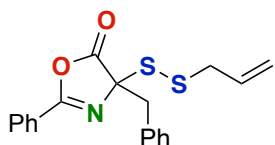

Colorless oil; TLC  $R_f$  0.43 (hexane/EtOAc = 8/1);  $^1\text{H NMR}$  (400 MHz,  $\text{CDCl}_3$ )  $\delta$  7.99-7.94 (m, 2H), 7.61-7.55 (m, 1H), 7.50-7.44 (m, 2H), 7.27-7.15 (m, 5H), 5.73-5.61 (m, 1H), 5.13-5.04 (m, 2H), 3.45 (s, 2H), 3.33 (ddd,  $J = 8.0, 1.0, 1.0$  Hz, 2H);  $^{13}\text{C}\{^1\text{H}\}$  NMR (101 MHz,  $\text{CDCl}_3$ )  $\delta$  176.1, 161.8, 133.6, 133.3, 132.1, 130.3, 129.0, 128.5, 128.3, 127.7, 125.2, 119.9, 81.4, 42.9, 40.6; HRMS (FAB $^+$ ) Calcd for  $\text{C}_{19}\text{H}_{18}\text{NO}_2\text{S}_2^+$   $[\text{M}+\text{H}]^+$  356.0773, found 356.0778.

#### 4-((1*H*-Indol-3-yl)methyl)-4-(allyldisulfanyl)-2-phenyloxazol-5(4*H*)-one (3fa)

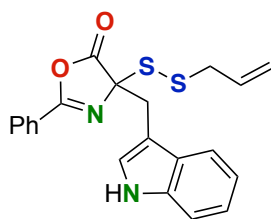

Yellow solid; TLC  $R_f$  0.23 (hexane/EtOAc = 3/1); m.p. 103-104 °C;  $^1\text{H NMR}$  (400 MHz,  $\text{CDCl}_3$ )  $\delta$  8.03 (s, 1H), 7.94-7.89 (m, 2H), 7.79-7.74 (m, 1H), 7.56-7.51 (m, 1H), 7.45-7.39 (m, 2H), 7.27-7.23 (m, 1H), 7.14-7.06 (m, 3H), 5.75-5.63 (m, 1H), 5.13-5.05 (m, 2H), 3.66 (d,  $J = 14.4$  Hz, 1H), 3.61 (d,  $J = 14.4$  Hz, 1H), 3.40-3.29 (m, 2H);  $^{13}\text{C}\{^1\text{H}\}$  NMR (101 MHz,  $\text{CDCl}_3$ )  $\delta$  176.6, 161.9, 135.8, 133.2, 132.2, 128.9, 128.3, 127.4, 125.3, 124.2, 122.3, 119.82, 119.78, 119.7, 111.0, 108.3, 81.8, 42.9, 30.9; HRMS (FAB $^+$ ) Calcd for  $\text{C}_{21}\text{H}_{19}\text{N}_2\text{O}_2\text{S}_2^+$   $[\text{M}+\text{H}]^+$  395.0882, found 395.0888.

#### 4-(Allyldisulfanyl)-4-isopropyl-2-phenyloxazol-5(4*H*)-one (3ga)

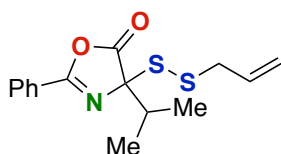

Colorless oil; TLC  $R_f$  0.33 (hexane/EtOAc = 16/1);  $^1\text{H NMR}$  (400 MHz,  $\text{CDCl}_3$ )  $\delta$  8.13-8.05 (m, 2H), 7.65-7.59 (m, 1H), 7.56-7.50 (m, 2H), 5.72-5.60 (m, 1H), 5.11-5.03 (m, 2H), 3.33-3.23 (m, 2H), 2.48 (sep,  $J = 6.8$  Hz, 1H), 1.23 (d,  $J = 6.8$  Hz, 3H), 1.04 (d,  $J = 6.8$  Hz, 3H);  $^{13}\text{C}\{^1\text{H}\}$  NMR (101 MHz,  $\text{CDCl}_3$ )  $\delta$  176.8, 161.8, 133.3, 132.2, 129.1, 128.4, 125.4, 119.7, 85.3, 42.8, 33.7, 18.2, 17.7; HRMS (FAB $^+$ ) Calcd for  $\text{C}_{15}\text{H}_{18}\text{NO}_2\text{S}_2^+$   $[\text{M}+\text{H}]^+$  308.0773, found 308.0771.

#### 4-(Allyldisulfanyl)-4-ethyl-2-phenyloxazol-5(4*H*)-one (3ha)

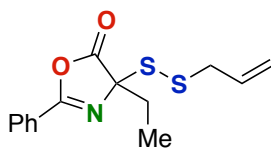

Colorless oil; TLC  $R_f$  0.42 (hexane/EtOAc = 8/1);  $^1\text{H NMR}$  (400 MHz,  $\text{CDCl}_3$ )  $\delta$  8.07 (d,  $J = 8.0$  Hz, 2H), 7.66-7.60 (m, 1H), 7.57-7.50 (m, 2H), 5.72-5.60 (m, 1H), 5.11-5.03 (m, 2H), 3.35-3.25 (m, 2H), 2.27-2.13 (m, 2H), 1.01 (t,  $J = 7.4$  Hz, 3H);  $^{13}\text{C}\{^1\text{H}\}$  NMR (101 MHz,  $\text{CDCl}_3$ )  $\delta$  176.7, 162.0, 133.4, 132.1, 129.1, 128.4, 125.3, 119.8, 81.6, 43.0, 28.2, 9.4; HRMS (FAB $^+$ ) Calcd for  $\text{C}_{14}\text{H}_{16}\text{NO}_2\text{S}_2^+$   $[\text{M}+\text{H}]^+$  294.0617, found 294.0617.

#### 4-Allyl-4-(allyldisulfanyl)-2-phenyloxazol-5(4H)-one (3ia)

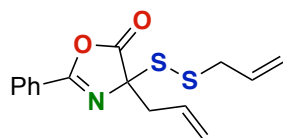

Colorless oil; TLC  $R_f$  0.48 (hexane/EtOAc = 8/1);  $^1\text{H NMR}$  (400 MHz,  $\text{CDCl}_3$ )  $\delta$  8.11-8.04 (m, 2H), 7.66-7.59 (m, 1H), 7.57-7.49 (m, 2H), 5.77-5.61 (m, 2H), 5.25 (d,  $J = 17.2$  Hz, 1H), 5.17 (d,  $J = 10.1$  Hz, 1H), 5.11-5.02 (m, 2H), 3.37-3.28 (m, 2H), 2.97-2.84 (m, 2H);  $^{13}\text{C}\{^1\text{H}\}$  NMR (150 MHz,  $\text{CDCl}_3$ )  $\delta$  176.2, 162.0, 133.5, 132.2, 129.9, 129.1, 128.5, 125.4, 121.4, 119.8, 80.5, 43.0, 39.0; HRMS (FAB $^+$ ) Calcd for  $\text{C}_{15}\text{H}_{16}\text{NO}_2\text{S}_2^+$   $[\text{M}+\text{H}]^+$  306.0617, found 306.0610.

#### 4-(Allyldisulfanyl)-2-(4-chlorophenyl)-4-methyloxazol-5(4H)-one (3ja)

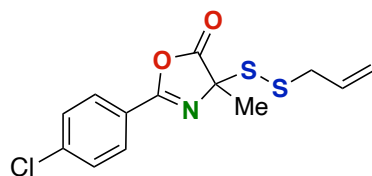

Colorless oil; TLC  $R_f$  0.47 (hexane/EtOAc = 8/1);  $^1\text{H NMR}$  (400 MHz,  $\text{CDCl}_3$ )  $\delta$  8.01 (d,  $J = 8.5$  Hz, 2H), 7.52 (d,  $J = 8.6$  Hz, 2H), 5.72-5.61 (m, 1H), 5.14-5.06 (m, 2H), 3.30 (d,  $J = 7.4$  Hz, 2H), 1.84 (s, 3H);  $^{13}\text{C}\{^1\text{H}\}$  NMR (150 MHz,  $\text{CDCl}_3$ )  $\delta$  176.9, 160.9, 140.0, 132.1, 129.7, 129.6, 123.9, 119.9, 76.8, 42.9, 21.1; HRMS (FAB $^+$ ) Calcd for  $\text{C}_{13}\text{H}_{13}^{35}\text{ClNO}_2\text{S}_2^+$   $[\text{M}+\text{H}]^+$  314.0071, found 314.0081.

#### *tert*-Butyl ((4-(allyldisulfanyl)-4-benzyl-5-oxo-4,5-dihydrooxazol-2-yl)methyl)carbamate (3ka)

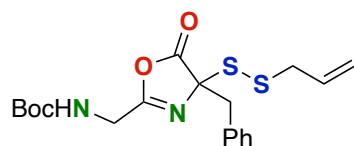

Colorless oil; TLC  $R_f$  0.40 (hexane/EtOAc = 3/1);  $^1\text{H NMR}$  (400 MHz,  $\text{CDCl}_3$ )  $\delta$  7.29-7.22 (m, 3H), 7.22-7.15 (m, 2H), 5.84-5.71 (m, 1H), 5.25-5.16 (m, 2H), 4.96 (br s, 1H), 4.19 (dd,  $J = 18.3, 5.6$  Hz, 1H), 4.00 (dd,  $J = 18.3, 5.6$  Hz, 1H), 3.42-3.28 (m, 4H), 1.46 (s, 9H);  $^{13}\text{C}\{^1\text{H}\}$  NMR (150 MHz,  $\text{CDCl}_3$ )  $\delta$  175.3, 163.4, 155.2, 133.1, 132.1, 130.1, 129.3, 128.9, 128.5, 127.8, 119.8, 80.4, 79.8, 42.5, 40.3, 38.1, 28.2; HRMS (FAB $^+$ ) Calcd for  $\text{C}_{19}\text{H}_{25}\text{N}_2\text{O}_4\text{S}_2^+$   $[\text{M}+\text{H}]^+$  409.1250, found 409.1256.

#### 4-Methyl-4-((2-methylallyl)disulfanyl)-2-phenyloxazol-5(4H)-one (3ab)

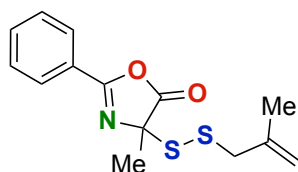

Colorless oil; TLC  $R_f$  0.48 (hexane/EtOAc = 4/1);  $^1\text{H NMR}$  (400 MHz,  $\text{CDCl}_3$ )  $\delta$  8.09-8.05 (m, 2H), 7.65-7.59 (m, 1H), 7.56-7.49 (m, 2H), 4.86-4.83 (m, 1H), 4.81-4.79 (m, 1H), 3.28 (d,  $J = 0.8$  Hz, 2H), 1.84 (s, 3H), 1.67-1.65 (m, 3H);  $^{13}\text{C}\{^1\text{H}\}$  NMR (101 MHz,  $\text{CDCl}_3$ )  $\delta$  177.2, 161.6, 139.5, 133.5, 129.1, 128.4, 125.3, 116.3, 76.9, 47.5, 21.1, 20.9; HRMS (FAB $^+$ ) Calcd for  $\text{C}_{14}\text{H}_{16}\text{NO}_2\text{S}_2^+$   $[\text{M}+\text{H}]^+$  294.0617, found 294.0620.

#### 4-((2-Bromoallyl)disulfanyl)-4-methyl-2-phenyloxazol-5(4H)-one (3ac)

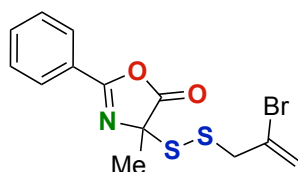

Colorless oil ; TLC  $R_f$  0.40 (hexane/EtOAc = 4/1);  $^1\text{H NMR}$  (400 MHz,  $\text{CDCl}_3$ )  $\delta$  8.08-8.03 (m, 2H), 7.66-7.60 (m, 1H), 7.56-7.50 (m, 2H), 5.75-7.72 (m, 1H), 5.52 (d,  $J = 1.9$  Hz, 1H), 3.59-3.55 (m, 2H), 1.85 (s, 3H);  $^{13}\text{C}\{^1\text{H}\}$  NMR (101 MHz,  $\text{CDCl}_3$ )  $\delta$  177.1, 161.9, 133.6, 129.2, 128.4, 126.9, 125.2, 121.6, 76.9, 49.7, 21.2; HRMS (FAB $^+$ ) Calcd for  $\text{C}_{13}\text{H}_{13}^{79}\text{BrNO}_2\text{S}_2^+$   $[\text{M}+\text{H}]^+$  357.9566, found 357.9567.

#### 4-(Dodecyldisulfanyl)-4-methyl-2-phenyloxazol-5(4H)-one (3ad)

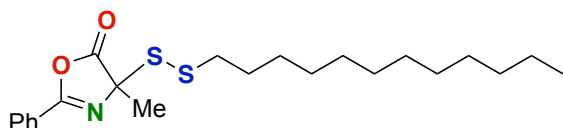

Colorless oi; TLC  $R_f$  0.40 (hexane/EtOAc = 30/1);  $^1\text{H NMR}$  (600 MHz,  $\text{CDCl}_3$ )  $\delta$  8.07-8.05 (m, 2H), 7.63-7.60 (m, 1H), 7.54-7.50 (m, 2H), 2.73-2.62 (m, 2H), 1.84 (s, 3H), 1.54-1.45 (m, 2H), 1.33-1.15 (m, 18H), 0.90-0.86 (t,  $J = 4.8$  Hz, 3H);  $^{13}\text{C}\{^1\text{H}\}$  NMR (150 MHz,  $\text{CDCl}_3$ )  $\delta$  177.1, 161.4, 133.2, 128.9, 128.2, 125.3, 76.8, 40.2, 31.9, 29.60, 29.59, 29.5, 29.4, 29.3, 29.1, 29.0, 28.3, 22.7, 21.0, 14.1; HRMS (FAB $^+$ ) Calcd for  $\text{C}_{22}\text{H}_{34}\text{NO}_2\text{S}_2^+$   $[\text{M}+\text{H}]^+$  408.2025, found 408.2021.

#### 4-(*tert*-Butyldisulfanyl)-4-methyl-2-phenyloxazol-5(4*H*)-one (3ae)

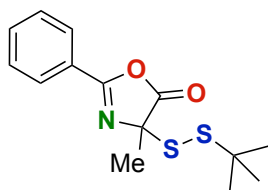

Colorless solid; TLC  $R_f$  0.53 (hexane/EtOAc = 4/1); m.p. 92-94 °C;  $^1\text{H NMR}$  (400 MHz,  $\text{CDCl}_3$ )  $\delta$  8.06-8.01 (m, 2H), 7.64-7.58 (m, 1H), 7.54-7.48 (m, 2H), 1.83 (s, 3H), 1.22 (s, 9H);  $^{13}\text{C}\{^1\text{H}\}$  NMR (101 MHz,  $\text{CDCl}_3$ )  $\delta$  177.1, 161.4, 133.3, 129.0, 128.4, 125.4, 76.0, 48.5, 30.5, 21.9; HRMS (FAB $^+$ ) Calcd for  $\text{C}_{14}\text{H}_{18}\text{NO}_2\text{S}_2^+$   $[\text{M}+\text{H}]^+$  296.0773, found 296.0770.

#### 4-((4-Methoxybenzyl)disulfanyl)-4-methyl-2-phenyloxazol-5(4*H*)-one (3af)

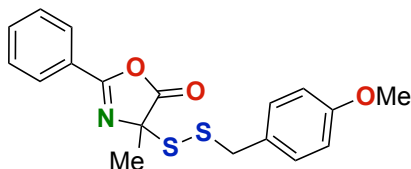

Colorless oil; TLC  $R_f$  0.37 (hexane/EtOAc = 4/1);  $^1\text{H NMR}$  (400 MHz,  $\text{CDCl}_3$ )  $\delta$  8.15-8.09 (m, 2H), 7.69-7.62 (m, 1H), 7.59-7.52 (m, 2H), 7.00-6.94 (m, 2H), 6.76-6.70 (m, 2H), 3.87 (s, 2H), 3.75 (s, 3H), 1.87 (s, 3H);  $^{13}\text{C}\{^1\text{H}\}$  NMR (101 MHz,  $\text{CDCl}_3$ )  $\delta$  177.3, 161.7, 159.2, 133.5, 130.7, 129.2, 128.4, 127.8, 125.3, 114.1, 77.2, 55.3, 44.2, 21.1; HRMS (FAB $^+$ ) Calcd for  $\text{C}_{18}\text{H}_{18}\text{NO}_3\text{S}_2^+$   $[\text{M}+\text{H}]^+$  360.0723, found 360.0732.

#### Methyl *N*-(*tert*-butoxycarbonyl)-*S*-((4-methyl-5-oxo-2-phenyl-4,5-dihydrooxazol-4-yl)thio)-*L*-cysteinate (3ag)

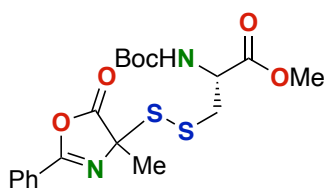

Isolated as a 1:1 mixture of diastereomers; Colorless oil; TLC  $R_f$  0.66 (hexane/EtOAc = 5/1);  $^1\text{H NMR}$  (400 MHz,  $\text{CDCl}_3$ )  $\delta$  8.08-8.04 (m, 2H+2H), 7.66-7.61 (m, 1H+1H), 7.56-7.51 (m, 2H+2H), 5.42-5.24 (m, 1H+1H), 4.58-4.48 (m, 1H+1H), 3.73 (s, 3H), 3.71 (s, 3H), 3.24-3.00 (m, 2H+2H), 1.83 (s, 3H+3H), 1.43 (s, 9H), 1.41 (s, 9H);  $^{13}\text{C}\{^1\text{H}\}$  NMR (150 MHz,  $\text{CDCl}_3$ )  $\delta$  176.63, 176.57, 170.75, 170.71, 161.8, 161.7, 154.9, 154.8, 133.41, 133.40, 129.0, 128.9, 128.23, 128.22, 124.99, 124.97, 80.2, 76.7, 76.6, 52.73, 52.72, 52.52, 52.50, 42.3, 42.0, 28.19, 28.16, 21.0, 20.9; HRMS (FAB $^+$ ) Calcd for  $\text{C}_{19}\text{H}_{25}\text{N}_2\text{O}_6\text{S}_2^+$   $[\text{M}+\text{H}]^+$  441.1149, found 441.1151.

#### 4-Methyl-2-phenyl-4-(phenyldisulfanyl)oxazol-5(4H)-one (3ah)

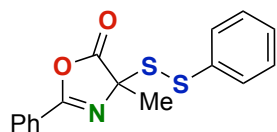

Colorless oil; TLC  $R_f$  0.50 (hexane/EtOAc = 5/1);  $^1\text{H NMR}$  (400 MHz,  $\text{CDCl}_3$ )  $\delta$  7.79 (d,  $J$  = 7.4 Hz, 2H), 7.56 (app. t,  $J$  = 7.4 Hz, 1H), 7.46-7.36 (m, 4H), 7.24-7.16 (m, 3H), 1.87 (s, 3H);  $^{13}\text{C}\{^1\text{H}\}$  NMR (101 MHz,  $\text{CDCl}_3$ )  $\delta$  176.2, 161.8, 135.6, 133.2, 128.8, 128.7, 128.33, 128.26, 127.5, 125.0, 77.1, 21.0; HRMS (FAB $^+$ ) Calcd for  $\text{C}_{16}\text{H}_{14}\text{NO}_2\text{S}_2^+$   $[\text{M}+\text{H}]^+$  360.0460, found 360.0458.

#### 4-Methyl-2-phenyl-4-(*p*-tolylidysulfanyl)oxazol-5(4H)-one (3ai)

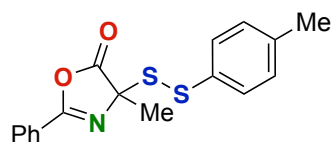

Colorless oil; TLC  $R_f$  0.50 (hexane/EtOAc = 5/1);  $^1\text{H NMR}$  (400 MHz,  $\text{CDCl}_3$ )  $\delta$  7.85 (d,  $J$  = 7.8 Hz, 2H), 7.58 (app. t,  $J$  = 7.2 Hz, 1H), 7.48-7.41 (m, 2H), 7.32-7.24 (m, 2H), 6.99 (d,  $J$  = 7.8 Hz, 2H), 2.78 (s, 3H), 1.84 (s, 3H);  $^{13}\text{C}\{^1\text{H}\}$  NMR (150 MHz,  $\text{CDCl}_3$ )  $\delta$  176.2, 161.8, 137.9, 133.2, 132.1, 129.6, 129.2, 128.7, 128.3, 125.0, 76.9, 21.1, 21.0; HRMS (FAB $^+$ ) Calcd for  $\text{C}_{17}\text{H}_{16}\text{NO}_2\text{S}_2^+$   $[\text{M}+\text{H}]^+$  330.0617, found 330.0638.

#### 4-((4-Methoxyphenyl)disulfanyl)-4-methyl-2-phenyloxazol-5(4H)-one (3aj)

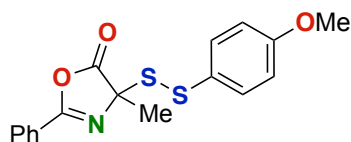

Colorless oil; TLC  $R_f$  0.30 (hexane/EtOAc = 5/1);  $^1\text{H NMR}$  (400 MHz,  $\text{CDCl}_3$ )  $\delta$  7.92 (d,  $J$  = 7.8 Hz, 2H), 7.60 (app. t,  $J$  = 7.4 Hz, 1H), 7.47 (app. t,  $J$  = 7.7 Hz, 2H), 7.34-7.30 (m, 2H), 6.70 (d,  $J$  = 8.8 Hz, 2H), 3.75 (s, 3H), 1.83 (s, 3H);  $^{13}\text{C}\{^1\text{H}\}$  NMR (150 MHz,  $\text{CDCl}_3$ )  $\delta$  176.3, 161.6, 159.9, 133.2, 132.2, 128.8, 128.3, 126.3, 125.2, 114.5, 76.8, 55.3, 21.0; HRMS (FAB $^+$ ) Calcd for  $\text{C}_{17}\text{H}_{16}\text{NO}_3\text{S}_2^+$   $[\text{M}+\text{H}]^+$  346.0566, found 330.0563.

#### 4-Methyl-4-(morpholinodisulfanyl)-2-phenyloxazol-5(4H)-one (3ak)

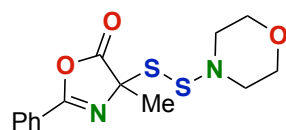

Colorless solid; TLC  $R_f$  0.28 (hexane/EtOAc = 5/1); m.p. 77-80 °C;  $^1\text{H NMR}$  (400 MHz,  $\text{CDCl}_3$ )  $\delta$  8.05 (dd,  $J$  = 8.4, 1.3 Hz, 2H), 7.65-7.59 (m, 1H), 7.55-7.49 (m, 2H), 3.62-3.51 (m,

4H), 2.88-2.83 (m, 2H), 2.77-2.68 (m, 2H), 1.87 (s, 3H);  $^{13}\text{C}\{^1\text{H}\}$  NMR (150 MHz,  $\text{CDCl}_3$ )  $\delta$  177.2, 161.5, 133.5, 129.1, 128.3, 125.4, 75.3, 67.0, 55.7, 22.6; HRMS (FAB<sup>+</sup>) Calcd for  $\text{C}_{14}\text{H}_{17}\text{N}_2\text{O}_3\text{S}_2^+$   $[\text{M}+\text{H}]^+$  360.0675, found 360.0669.

**Methyl *N*-(*N*-(*tert*-butoxycarbonyl)-*O*-(*tert*-butyldimethylsilyl)-*L*-seryl)-*S*-((4-methyl-5-oxo-2-phenyl-4,5-dihydrooxazol-4-yl)thio)-*L*-cysteinate (3al)**

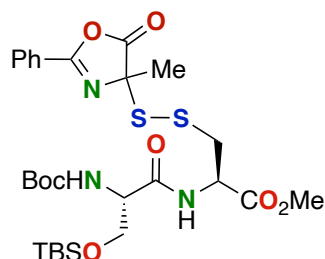

Isolated as a 1.1:1 mixture of diastereomers; Colorless oil;  $R_f$  0.25 (hexane/EtOAc = 3/1);  $^1\text{H}$  NMR (600 MHz,  $\text{CDCl}_3$ )  $\delta$  8.07-8.03 (m, 2H+2H), 7.63 (app. t,  $J = 7.5$  Hz, 1H+1H), 7.53 (app. t,  $J = 7.9$  Hz, 2H+2H), 5.33 (br s, 1H+1H), 4.84-4.76 (m, 1H+1H), 4.15 (br s, 1H), 4.11 (br s, 1H), 4.01-3.96 (m, 1H+1H), 3.76-3.73 (m, 3H+1H+1H), 3.70 (s, 3H), 3.67-3.61 (m, 1H+1H), 3.23-3.04 (m, 2H+2H), 1.83 (s, 3H+3H), 1.46 (s, 9H+9H), 0.87 (s, 9H+9H), 0.07-0.06 (m, 6H+6H);  $^{13}\text{C}\{^1\text{H}\}$  NMR (150 MHz,  $\text{CDCl}_3$ )  $\delta$  176.8, 176.7, 170.64, 170.58, 170.15, 170.06, 162.0, 161.9, 155.6, 133.64, 133.59, 129.2, 129.1, 128.5, 128.4, 125.20, 125.17, 80.3, 76.90, 76.88, 63.2, 55.6, 52.8, 51.9, 51.8, 42.2, 41.6, 28.4, 26.00, 25.96, 21.2, 21.1, 18.3, -5.30, -5.32, -5.4; HRMS (FAB<sup>+</sup>) Calcd for  $\text{C}_{28}\text{H}_{44}\text{N}_3\text{O}_8\text{S}_2\text{Si}^+$   $[\text{M}+\text{H}]^+$  642.2334, found. 642.2332.

**4-Methyl-4-((2-((8*R*,9*S*,13*S*,14*S*)-13-methyl-17-oxo-7,8,9,11,12,13,14,15,16,17-decahydro-6*H*-cyclopenta[*a*]phenanthren-3-yl)allyl)disulfanyl)-2-phenyloxazol-5(4*H*)-one (3am)**

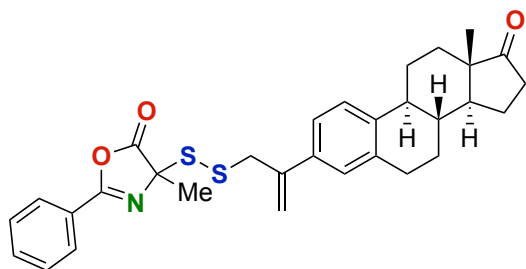

Isolated as a 1:1 mixture of diastereomers; Yellow oil;  $R_f$  0.33 (hexane/EtOAc = 3/1);  $^1\text{H}$  NMR (400 MHz,  $\text{CDCl}_3$ )  $\delta$  8.10-8.05 (m, 2H+2H), 7.66-7.62 (m, 1H+1H), 7.55-7.52 (m, 2H+2H), 7.18-7.07 (m, 3H+3H), 5.43-5.40 (m, 1H+1H), 5.10-5.08 (m, 1H+1H), 3.78-3.75 (m, 2H+2H), 2.90-2.84 (m, 2H+2H), 2.54-2.47 (m, 1H+1H), 2.43-2.38 (m, 1H+1H), 2.33-2.20 (m, 1H+1H), 2.20-1.95 (m, 4H+4H), 1.86 (s, 3H+3H), 1.65-1.43 (m, 6H+6H), 0.90 (s, 3H+3H);  $^{13}\text{C}\{^1\text{H}\}$  NMR (101 MHz,  $\text{CDCl}_3$ )  $\delta$  221.0, 177.3, 161.7, 141.6, 139.8, 136.6, 135.9, 133.5, 129.1, 128.4, 126.8, 125.6, 125.4, 123.6, 117.0, 76.9, 50.6, 48.1, 44.7, 44.473, 44.465, 38.1, 36.0, 31.7, 29.5, 26.6, 25.7, 21.7, 21.2, 14.0; HRMS (FAB<sup>+</sup>) Calcd for  $\text{C}_{31}\text{H}_{34}\text{NO}_3\text{S}_2^+$   $[\text{M}+\text{H}]^+$  532.1975, found 532.1977.

## 2-((Trimethylsilyl)methyl)allyl 9H-fluorene-1-carboxylate (4)

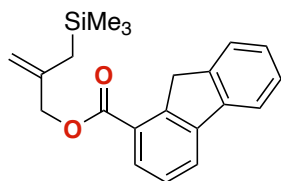

Colorless oil; TLC  $R_f$  0.38 (hexane/EtOAc = 20/1);  $^1\text{H NMR}$  (400 MHz,  $\text{CDCl}_3$ )  $\delta$  8.05 (d,  $J = 7.7$  Hz, 1H), 7.99 (d,  $J = 7.6$  Hz, 1H), 7.81 (d,  $J = 7.5$  Hz, 1H), 7.60 (d,  $J = 7.2$  Hz, 1H), 7.49 (app. t,  $J = 7.7$  Hz, 1H), 7.40 (app. t,  $J = 7.2$  Hz, 1H), 7.35 (app. t,  $J = 7.4$  Hz, 1H), 5.05-5.02 (m, 1H), 4.81 (s, 1H), 4.76 (s, 2H), 4.29 (s, 2H), 1.67 (s, 2H), 0.09 (s, 9H);  $^{13}\text{C}\{^1\text{H}\}$  NMR (150 MHz,  $\text{CDCl}_3$ )  $\delta$  166.5, 145.6, 143.9, 143.2, 141.9, 140.5, 128.6, 127.5, 127.2, 127.1, 126.9, 125.1, 124.2, 120.0, 109.8, 68.2, 38.9, 23.8, -1.3; HRMS ( $\text{EI}^+$ ) Calcd for  $\text{C}_{21}\text{H}_{24}\text{O}_2\text{Si}^+$   $[\text{M}]^+$  336.1540, found 336.1546.

## 2-(((1,3-Dioxoisindolin-2-yl)disulfanyl)methyl)allyl 9H-fluorene-1-carboxylate (5)

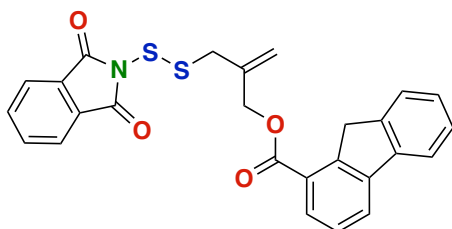

Colorless solid; TLC  $R_f$  0.49 (hexane/EtOAc = 3/1); m.p. 132-135 °C;  $^1\text{H NMR}$  (600 MHz,  $\text{CDCl}_3$ )  $\delta$  8.01 (dd,  $J = 7.8, 1.0$  Hz, 1H), 7.97 (d,  $J = 7.6$  Hz, 1H), 7.90-7.86 (m, 2H), 7.81 (d,  $J = 7.5$  Hz, 1H), 7.75-7.71 (m, 2H), 7.60 (d,  $J = 7.3$  Hz, 1H), 7.47 (app. t,  $J = 7.6$  Hz, 1H), 7.40 (app. t,  $J = 7.4$  Hz, 1H), 7.35 (app. dt,  $J = 7.4, 1.2$  Hz, 1H), 5.61 (s, 1H), 5.47 (d,  $J = 1.1$  Hz, 1H), 4.94 (s, 2H), 4.23 (s, 2H), 3.90 (s, 2H);  $^{13}\text{C}\{^1\text{H}\}$  NMR (101 MHz,  $\text{CDCl}_3$ )  $\delta$  167.8, 166.3, 145.6, 143.7, 143.1, 140.4, 138.3, 134.8, 132.2, 128.6, 127.5, 127.2, 126.8, 126.6, 125.1, 124.3, 124.1, 120.0, 119.5, 65.7, 44.0, 38.8; HRMS ( $\text{EI}^+$ ) Calcd for  $\text{C}_{26}\text{H}_{19}\text{NO}_4\text{S}_2^+$   $[\text{M}]^+$  473.0750, found 473.0751.

## 2-(((4-Benzyl-5-oxo-2-phenyl-4,5-dihydrooxazol-4-yl)disulfanyl)methyl)allyl 9H-fluorene-1-carboxylate (6)

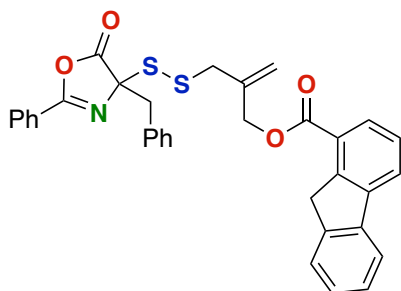

Colorless oil; TLC  $R_f$  0.30 (hexane/EtOAc = 8/1);  $^1\text{H NMR}$  (400 MHz,  $\text{CDCl}_3$ )  $\delta$  8.00-7.96 (m, 2H), 7.95-7.90 (m, 2H), 7.81 (d,  $J = 7.2$  Hz, 1H), 7.60 (d,  $J = 6.8$  Hz, 1H), 7.57-7.52 (m,



1H), 7.50-7.33 (m, 5H), 7.25-7.14 (m, 5H), 5.34 (s, 1H), 5.19 (s, 1H), 4.83 (s, 2H), 4.24 (s, 2H), 3.50 (s, 2H), 3.45 (s, 2H);  $^{13}\text{C}\{^1\text{H}\}$  NMR (150 MHz,  $\text{CDCl}_3$ )  $\delta$  175.9, 166.1, 161.8, 145.5, 143.6, 143.1, 140.3, 138.0, 133.4, 133.3, 130.2, 129.6, 128.9, 128.7, 128.5, 128.4, 128.2, 127.9, 127.6, 127.4, 127.1, 126.7, 126.5, 125.01, 124.99, 124.2, 119.9, 81.3, 65.4, 42.5, 40.6, 38.7; HRMS (FAB<sup>+</sup>) Calcd for  $\text{C}_{34}\text{H}_{28}\text{NO}_4\text{S}_2^+$  [M+H]<sup>+</sup> 578.1454, found 578.1463.

**(2*S*,3*S*,4*R*,5*S*,6*R*)-2-(Acetoxymethyl)-6-((4-isopropyl-5-oxo-2-phenyl-4,5-dihydrooxazol-4-yl)disulfanyl)tetrahydro-2*H*-pyran-3,4,5-triyl triacetate (10)**

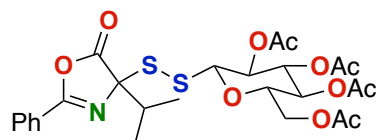

Isolated as a 1:1 mixture of diastereomers; Colorless oil; TLC  $R_f$  0.15 (hexane/EtOAc = 3/1);  $^1\text{H}$  NMR (400 MHz,  $\text{CDCl}_3$ )  $\delta$  8.09-8.04 (m, 2H+2H), 7.66-7.58 (m, 1H+1H), 7.56-7.48 (m, 2H+2H), 5.22-5.00 (m, 2H+3H), 4.85 (dd,  $J = 10.4, 9.0$  Hz, 1H), 4.56 (d,  $J = 10.4$  Hz, 1H), 4.41 (d,  $J = 9.5$  Hz, 1H), 4.26-4.24 (m, 1H+1H), 4.20-4.15 (m, 1H), 3.95-3.87 (m, 1H), 3.74-3.69 (m, 1H), 3.61-3.57 (m, 1H), 2.49-2.40 (m, 1H+1H), 2.09 (s, 3H), 2.07 (s, 3H), 2.01 (s, 3H+3H+3H), 2.00 (s, 3H), 1.95 (s, 3H), 1.94 (s, 3H), 1.22 (d,  $J = 6.8$  Hz, 3H), 1.21 (d,  $J = 6.8$  Hz, 3H), 1.051 (d,  $J = 6.8$  Hz, 3H), 1.047 (d,  $J = 6.8$  Hz, 3H);  $^{13}\text{C}\{^1\text{H}\}$  NMR (150 MHz,  $\text{CDCl}_3$ )  $\delta$  176.4, 176.1, 170.88, 170.87, 170.4, 170.1, 169.5, 169.4, 169.2, 162.5, 162.4, 133.6, 133.5, 129.1, 129.0, 128.55, 128.49, 125.5, 125.3, 84.4, 76.7, 76.3, 73.9, 70.0, 68.05, 67.97, 62.1, 61.8, 34.7, 34.6, 20.92, 20.89, 20.73, 20.69, 20.65, 20.6, 20.3, 18.0, 17.9, 17.67, 17.65; HRMS (FAB<sup>+</sup>) Calcd for  $\text{C}_{26}\text{H}_{32}\text{NO}_{11}\text{S}_2^+$  [M+H]<sup>+</sup> 598.1411, found. 598.1400.

**4-(((3-(9,10-Ethanoanthracen-9(10*H*)-yl)propyl)(methyl)amino)disulfanyl)-4-(2-(methylthio)ethyl)-2-phenyloxazol-5(4*H*)-one (14)**

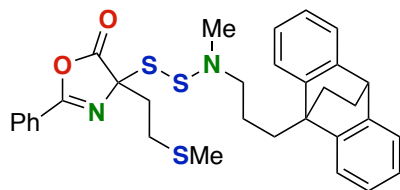

Pale yellow oil; TLC  $R_f$  0.51 (hexane/EtOAc = 5/1);  $^1\text{H}$  NMR (400 MHz,  $\text{CDCl}_3$ )  $\delta$  8.08 (d,  $J = 7.2$  Hz, 2H), 7.56 (app. t,  $J = 7.4$  Hz, 1H), 7.47 (app. t,  $J = 7.8$  Hz, 2H), 7.27-7.20 (m, 2H), 7.14-7.02 (m, 6H), 4.25-4.20 (m, 1H), 3.02-2.90 (m, 2H), 2.70 (s, 3H), 2.67-2.50 (m, 4H), 2.26 (t,  $J = 8.3$  Hz, 2H), 2.07 (s, 3H), 1.90-1.80 (m, 2H), 1.80-1.73 (m, 2H), 1.47-1.38 (m, 2H);  $^{13}\text{C}\{^1\text{H}\}$  NMR (150 MHz,  $\text{CDCl}_3$ )  $\delta$  176.9, 162.3, 145.21, 145.17, 144.90, 144.87, 133.3, 129.0, 128.3, 125.4, 125.22, 125.21, 125.19, 123.31, 121.27, 121.18, 121.16, 77.7, 60.7, 46.4, 44.6, 44.5, 35.0, 29.5, 28.1, 27.6, 23.2, 15.0; HRMS (FAB<sup>+</sup>) Calcd for  $\text{C}_{32}\text{H}_{35}\text{N}_2\text{O}_2\text{S}_3^+$  [M+H]<sup>+</sup> 575.1855, found. 575.1868.

## 2-(Allyldisulfanyl)-2-benzamidopropanoic acid (15a)

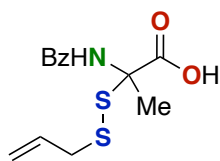

Colorless oil; TLC  $R_f$  0.63 (CHCl<sub>3</sub>/MeOH = 5/1); <sup>1</sup>H NMR (400 MHz, CD<sub>3</sub>OD) δ 7.90-7.85 (m, 2H), 7.60-7.54 (m, 1H), 7.52-7.45 (m, 2H), 5.80-5.69 (m, 1H), 5.06 (s, 1H), 5.02-5.01 (m, 1H), 3.30-3.19 (m, 2H), 1.95 (s, 3H); <sup>13</sup>C{<sup>1</sup>H} NMR (150 MHz, CD<sub>3</sub>OD) δ 173.8, 168.5, 134.8, 133.9, 133.1, 129.6, 128.3, 119.2, 68.7, 42.7, 24.5; HRMS (FAB<sup>+</sup>) Calcd for C<sub>13</sub>H<sub>16</sub>NO<sub>3</sub>S<sub>2</sub><sup>+</sup> [M+H]<sup>+</sup> 298.0566, found 298.0578.

## Methyl 2-(allyldisulfanyl)-2-benzamidopropanoate (15b)

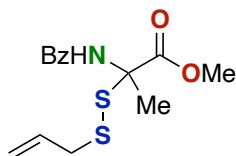

Colorless oil; TLC  $R_f$  0.30 (hexane/EtOAc = 5/1); <sup>1</sup>H NMR (400 MHz, CDCl<sub>3</sub>) δ 7.87-7.84 (m, 2H), 7.60-7.56 (m, 1H), 7.56-7.51 (m, 1H), 7.51-7.44 (m, 2H), 5.78-5.67 (m, 1H), 5.12-5.03 (m, 2H), 3.87 (s, 3H), 3.24 (d,  $J$  = 7.4 Hz, 2H), 2.09 (s, 3H); <sup>13</sup>C{<sup>1</sup>H} NMR (150 MHz, CDCl<sub>3</sub>) δ 171.7, 166.1, 134.2, 132.4, 132.0, 128.7, 127.1, 119.3, 66.4, 53.5, 42.0, 22.1; HRMS (FAB<sup>+</sup>) Calcd for C<sub>14</sub>H<sub>18</sub>NO<sub>3</sub>S<sub>2</sub><sup>+</sup> [M+H]<sup>+</sup> 312.0723, found 312.0722.

## ((3a*R*,5*R*,5a*S*,8a*S*,8b*R*)-2,2,7,7-Tetramethyltetrahydro-5*H*-bis([1,3]dioxolo)[4,5-*b*:4',5'-*d*]pyran-5-yl)methyl 2-(allyldisulfanyl)-2-benzamidopropanoate (15c)

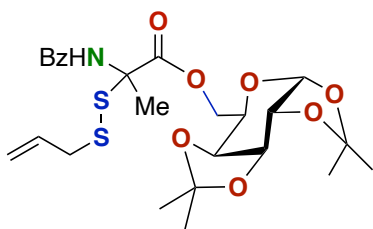

Isolated as a 1:1 mixture of diastereomers, Colorless oil; TLC  $R_f$  0.18 (hexane/EtOAc = 5/1); <sup>1</sup>H NMR (400 MHz, CDCl<sub>3</sub>) δ 7.89-7.82 (m, 2H+2H), 7.64-7.58 (m, 1H+1H), 7.58-7.51 (m, 1H+1H), 7.50-7.42 (m, 2H+2H), 5.79-5.65 (m, 1H+1H), 5.60-5.50 (m, 1H+1H), 5.11-5.02 (m, 2H+2H), 4.66-4.59 (m, 1H+1H), 4.48-4.31 (m, 2H+2H), 4.31-4.23 (m, 1H+1H), 4.16-4.04 (m, 1H+1H), 3.82-3.70 (m, 1H+1H), 3.25 (t,  $J$  = 6.7 Hz, 2H+2H), 2.12 (s, 3H+3H), 1.51-1.42 (m, 6H+6H), 1.33 (s, 6H+6H); <sup>13</sup>C{<sup>1</sup>H} NMR (150 MHz, CDCl<sub>3</sub>) δ 170.99, 170.96, 166.0, 165.9, 132.54, 132.46, 132.00, 131.98, 128.70, 128.69, 127.08, 127.07, 119.24, 119.19, 109.72, 109.70, 108.85, 108.84, 96.3, 96.2, 70.9, 70.81, 70.75, 70.66, 70.64, 70.56, 70.48, 70.43, 66.7, 66.5, 66.0, 65.6, 65.3, 65.1, 42.2, 42.1, 26.0, 25.9, 24.94, 24.91, 24.40, 24.39, 24.28, 22.0; HRMS (FAB<sup>+</sup>) Calcd for C<sub>25</sub>H<sub>34</sub>NO<sub>8</sub>S<sub>2</sub><sup>+</sup> [M+H]<sup>+</sup> 540.1720, found 540.1727.

***N*-2-(Allyldisulfanyl)-1-((((1*R*,4*aS*,10*aR*)-7-isopropyl-1,4*a*-dimethyl-1,2,3,4*a*,9,10,10*a*-octahydrophenanthren-1-yl)methyl)amino)-1-oxopropan-2-yl)benzamide (15d)**

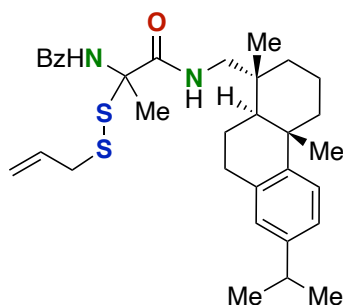

Isolated as a 1:1 mixture of diastereomers, Colorless oil; TLC  $R_f$  0.23 (hexane/EtOAc = 5/1);  $^1\text{H NMR}$  (400 MHz,  $\text{CDCl}_3$ )  $\delta$  8.24 (s, 1H+1H), 7.85-7.81 (m, 2H+2H), 7.54-7.43 (m, 3H+3H), 7.16 (d,  $J = 8.1$  Hz, 1H+1H), 7.04-6.96 (m, 1H+1H), 6.90-6.84 (m, 1H+1H), 6.51-6.42 (m, 1H+1H), 5.72-5.56 (m, 1H+1H), 5.10-4.96 (m, 2H+2H), 3.39-3.08 (m, 3H+3H), 2.98-2.76 (m, 3H+3H), 2.30 (d,  $J = 12.9$  Hz, 1H+1H), 2.06 (s, 3H), 2.04 (s, 3H), 1.88-1.36 (m, 9H+9H), 1.28-1.20 (m, 9H+9H), 1.00 (s, 3H), 0.97 (s, 3H);  $^{13}\text{C}\{^1\text{H}\}$  NMR (150 MHz,  $\text{CDCl}_3$ )  $\delta$  171.7, 171.6, 165.52, 165.51, 146.9, 146.8, 145.61, 145.57, 134.6, 134.50, 134.45, 134.4, 132.39, 132.38, 131.87, 131.86, 128.7, 127.0, 126.85, 126.77, 124.2, 124.1, 123.9, 123.8, 119.3, 119.1, 69.1, 68.9, 51.3, 51.1, 46.4, 45.6, 41.7, 41.6, 38.30, 38.27, 37.67, 37.65, 37.54, 37.46, 36.30, 36.25, 33.39, 30.35, 30.2, 25.3, 23.95, 23.93, 23.8, 23.7, 19.12, 18.55, 18.51, 18.42, 18.40; HRMS (FAB $^+$ ) Calcd for  $\text{C}_{33}\text{H}_{45}\text{N}_2\text{O}_2\text{S}_2^+$   $[\text{M}+\text{H}]^+$  565.2917, found 565.2921.

***N*-2-(Allyldisulfanyl)-1-(butylamino)-4-(methylthio)-1-oxobutan-2-yl)benzamide (15e)**

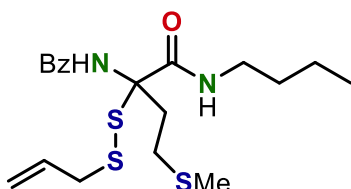

Colorless oil; TLC  $R_f$  0.22 (hexane/EtOAc = 5/1);  $^1\text{H NMR}$  (400 MHz,  $\text{CDCl}_3$ )  $\delta$  8.32 (s, 1H), 7.91-7.87 (m, 2H), 7.58-7.51 (m, 1H), 7.50-7.44 (m, 2H), 6.44 (br s, 1H), 5.75-5.64 (m, 1H), 5.10-5.00 (m, 2H), 3.55-3.47 (m, 1H), 3.43-3.30 (m, 2H), 3.23 (d,  $J = 7.1$  Hz, 2H), 2.51-2.43 (m, 1H), 2.33-2.24 (m, 1H), 2.11-2.01 (m, 1H), 2.06 (s, 3H), 1.61-1.53 (m, 2H), 1.44-1.36 (m, 2H), 0.97 (t,  $J = 7.3$  Hz, 3H);  $^{13}\text{C}\{^1\text{H}\}$  NMR (150 MHz,  $\text{CDCl}_3$ ) Peak splitting due to rotamers was observed.  $\delta$  171.1, 170.2, 165.4, 165.1, 134.4, 133.1, 132.6, 132.2, 132.0, 128.9, 128.8, 127.2, 127.1, 119.4, 118.2, 72.1, 68.3, 41.9, 40.5, 40.4, 36.6, 35.2, 33.4, 31.5, 29.0, 28.6, 20.2, 15.7, 13.8; HRMS (FAB $^+$ ) Calcd for  $\text{C}_{19}\text{H}_{29}\text{N}_2\text{O}_2\text{S}_3^+$   $[\text{M}+\text{H}]^+$  413.1386, found 413.1391.

**(5*R*,5*aR*,8*aR*,9*R*)-8-Oxo-9-(3,4,5-trimethoxyphenyl)-5,5*a*,6,8,8*a*,9-hexahydrofuro[3',4':6,7]naphtho[2,3-*d*][1,3]dioxol-5-yl 2-(2-((1,3-dioxoisindolin-2-yl)disulfanyl)phenyl)acetate**

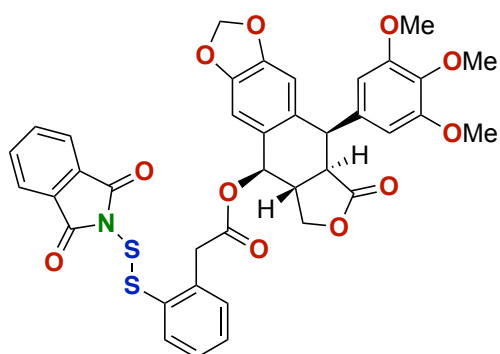

Colorless oil; TLC  $R_f$  0.29 (hexane/EtOAc = 1/1);  $^1\text{H NMR}$  (400 MHz,  $\text{CDCl}_3$ )  $\delta$  7.99 (dd,  $J = 7.6, 1.4$  Hz, 1H), 7.91-7.88 (m, 2H), 7.80-7.77 (m, 2H), 7.42 (app. dt,  $J = 7.5, 1.6$  Hz, 1H), 7.42 (app. dt,  $J = 7.5, 1.6$  Hz, 1H), 7.30-7.25 (m, 1H), 6.67 (s, 1H), 6.51 (s, 1H), 6.34 (s, 2H), 5.979 (d,  $J = 7.2$  Hz, 1H), 5.976 (d,  $J = 7.2$  Hz, 1H), 5.73 (d,  $J = 8.4$  Hz, 1H), 4.56 (d,  $J = 3.9$  Hz, 1H), 4.24 (dd,  $J = 9.2, 6.4$  Hz, 1H), 3.98-3.93 (m, 1H), 3.90 (d,  $J = 14.9$  Hz, 1H), 3.81 (s, 3H), 3.78-3.75 (m, 1H), 3.74 (s, 6H), 2.87-2.71 (m, 2H);  $^{13}\text{C}\{^1\text{H}\}$  NMR (150 MHz,  $\text{CDCl}_3$ )  $\delta$  173.5, 171.2, 166.7, 152.5, 148.1, 147.5, 137.0, 135.5, 134.8, 134.7, 133.9, 132.7, 132.2, 132.0, 130.8, 129.4, 128.9, 127.9, 124.1, 109.5, 108.0, 106.9, 101.5, 74.3, 71.1, 60.6, 56.1, 45.3, 43.6, 39.5, 38.6; HRMS (FAB $^+$ ) Calcd for  $\text{C}_{38}\text{H}_{31}\text{NO}_{11}\text{S}_2^+$  [M] $^+$  741.1339, found 741.1365.

**(5*R*,5*aR*,8*aR*,9*R*)-8-Oxo-9-(3,4,5-trimethoxyphenyl)-5,5*a*,6,8,8*a*,9-hexahydrofuro[3',4':6,7]naphtho[2,3-*d*][1,3]dioxol-5-yl 2-(2-((4-methyl-5-oxo-2-phenyl-4,5-dihydrooxazol-4-yl)disulfanyl)phenyl)acetate (18)**

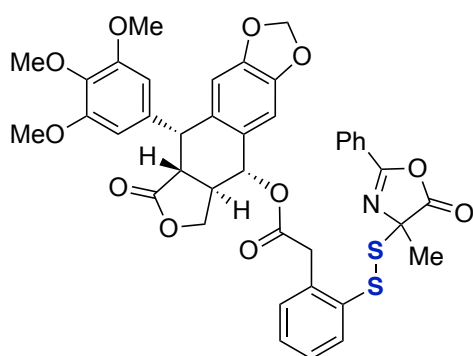

Isolated as a 1.7:1 mixture of diastereomers; Colorless oil; TLC  $R_f$  0.45 (hexane/EtOAc = 1/1);  $^1\text{H NMR}$  (400 MHz,  $\text{CDCl}_3$ )  $\delta$  7.80-7.68 (m, 2H+2H), 7.63-7.51 (m, 1H+1H), 7.49-7.38 (m, 2H+2H), 7.32-7.18 (m, 3H+3H), 7.12-7.02 (m, 1H+1H), 6.77-6.68 (m, 1H, minor), 6.61 (s, 1H, minor), 6.54-6.48 (m, 2H, major), 6.38 (s, 2H, minor), 6.33 (s, 2H, major), 6.10-5.95 (m, 2H+2H), 5.90-5.72 (m, 1H+1H), 4.60-4.54 (m, 1H+1H), 4.41-3.92 (m, 3H+3H), 3.83-3.70 (m, 9H+9H), 3.56-3.48 (m, 1H, major), 2.95-2.69 (m, 3H+2H), 1.89-1.80 (m, 3H+3H);  $^{13}\text{C}\{^1\text{H}\}$  NMR (150 MHz,  $\text{CDCl}_3$ ) The peaks are intricately split probably due to the generation of conformers.  $\delta$  176.9, 175.91, 175.89, 173.67, 173.64, 171.3, 171.2, 162.0, 161.9, 152.8, 148.3, 147.72, 139.8, 139.7, 138.63, 138.56, 137.3, 135.6, 135.5, 134.94, 134.86, 133.59, 133.58, 132.39, 132.35, 131.2, 131.1, 130.7, 128.9, 128.67, 128.65, 128.51, 128.48, 128.37, 128.36,

128.1, 127.9, 125.0, 109.8, 109.7, 108.2, 107.01, 107.00, 101.72, 101.71, 76.4, 76.3, 74.5, 74.4, 71.4, 71.3, 60.9, 56.30, 56.29, 45.6, 45.5, 43.83, 43.81, 40.2, 40.1, 39.49, 39.48, 38.74, 38.73, 38.6, 22.4, 22.3, 21.37; **HRMS** (FAB<sup>+</sup>) Calcd for C<sub>40</sub>H<sub>35</sub>NO<sub>11</sub>S<sub>2</sub><sup>+</sup> [M]<sup>+</sup> 769.1646, found 769.1657.

**Benzyl** *N*<sup>6</sup>-(2-benzamido-2-((2-(2-oxo-2-(((5*R*,5*aR*,8*aR*,9*R*)-8-oxo-9-(3,4,5-trimethoxyphenyl)-5,5*a*,6,8,8*a*,9-hexahydrofuro[3',4':6,7]naphtho[2,3-*d*][1,3]dioxol-5-yl)oxy)ethyl)phenyl)disulfanyl)propanoyl)-*N*<sup>2</sup>-((benzyloxy)carbonyl)-*L*-lysinate (**20**)

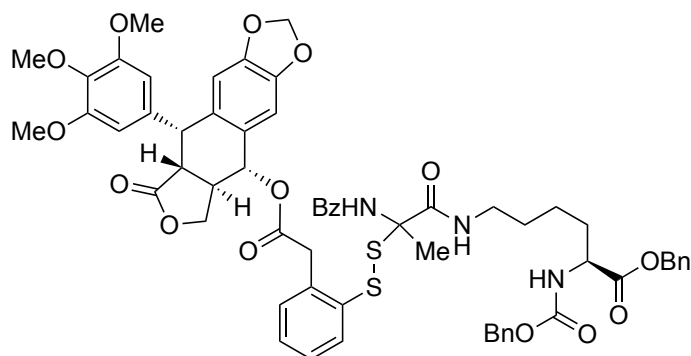

Isolated as a 1.3:1 mixture of diastereomers; Yellow oil; *R*<sub>f</sub> 0.28 (hexane/EtOAc = 1/1); <sup>1</sup>H NMR (400 MHz, CDCl<sub>3</sub>) δ 7.83-7.78 (m, 2H+2H), 7.56-7.38 (m, 3H+3H), 7.38-7.25 (m, 13H+13H), 7.24-7.18 (m, 1H+1H), 6.69-6.65 (m, 1H+1H), 6.54-6.50 (m, 1H+1H), 6.38-6.33 (m, 2H+2H), 5.99-5.93 (m, 2H+2H), 5.86-5.83 (m, 1H+1H), 5.15-5.07 (m, 3H+3H), 4.60-4.55 (m, 1H+1H), 4.39 (br s, 1H+1H), 4.34-4.28 (m, 1H+1H), 4.15-4.10 (m, 1H+1H), 4.00-3.85 (m, 2H+2H), 3.80 (s, 4H+4H), 3.76-3.73 (m, 3H+3H), 3.71 (s, 6H+6H), 3.23 (br s, 1H+1H), 2.92-2.75 (m, 3H+3H), 1.70-1.25 (m, 8H+8H), 0.90-0.85 (m, 1H+1H); <sup>13</sup>C{<sup>1</sup>H} NMR (150 MHz, CDCl<sub>3</sub>) The peaks are intricately split probably due to the generation of conformers. δ 173.69, 173.67, 172.4, 171.6, 171.5, 169.4, 165.3, 156.2, 152.8, 148.34, 148.33, 147.74, 147.72, 137.3, 136.4, 136.0, 135.2, 134.92, 134.90, 134.8, 133.5, 132.5, 132.4, 132.2, 131.1, 131.0, 130.2, 129.8, 129.2, 128.9, 128.85, 128.77, 128.76, 128.735, 128.725, 128.71, 128.68, 128.67, 128.64, 128.56, 128.44, 128.40, 128.33, 128.30, 128.23, 128.18, 128.1, 127.7, 127.5, 127.0, 109.8, 108.2, 107.10, 107.07, 101.7, 74.53, 74.51, 73.38, 73.36, 71.5, 67.3, 67.13, 67.09, 60.9, 56.31, 56.28, 53.9, 45.61, 45.57, 43.84, 40.0, 39.7, 38.7, 32.0, 31.0, 29.82, 29.77, 22.8, 22.5, 14.3, 14.2; **HRMS** (ESI<sup>+</sup>) Calcd for C<sub>61</sub>H<sub>61</sub>N<sub>3</sub>O<sub>15</sub>S<sub>2</sub>Na<sup>+</sup> [M+Na]<sup>+</sup> 1162.3436, found 1162.3423.

**2-(((4-Methyl-5-oxo-2-phenyl-4,5-dihydrooxazol-4-yl)disulfanyl)methyl)allyl (2*S*)-2-(4-isobutylphenyl)propanoate (**22**)**

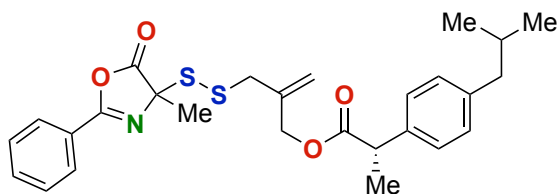

Isolated as a 1:1 mixture of diastereomers; Colorless oil; TLC *R*<sub>f</sub> 0.33 (hexane/EtOAc = 6/1); <sup>1</sup>H NMR (400 MHz, CDCl<sub>3</sub>) δ 8.08-8.00 (m, 2H+2H), 7.66-7.59 (m, 1H+1H), 7.55-7.49 (m, 2H+2H), 7.18-7.14 (m, 2H+2H), 7.08-7.03 (m, 2H+2H), 5.06-5.02 (m, 1H+1H), 5.02-4.97 (m,

1H+1H), 4.55-4.43 (m, 2H+2H), 3.682 (q,  $J = 7.2$  Hz, 1H), 3.678 (q,  $J = 7.2$  Hz, 1H), 3.24-3.15 (m, 2H+2H), 2.42 (d,  $J = 7.2$  Hz, 2H), 2.41 (d,  $J = 7.2$  Hz, 2H), 1.87-1.74 (m, 4H+4H), 1.474 (d,  $J = 7.2$  Hz, 3H), 1.471 (d,  $J = 7.2$  Hz, 3H), 0.871 (d,  $J = 6.6$  Hz, 3H+3H), 0.865 (d,  $J = 6.6$  Hz, 3H+3H);  $^{13}\text{C}\{^1\text{H}\}$  NMR (101 MHz,  $\text{CDCl}_3$ )  $\delta$  177.2, 177.1, 174.2, 161.72, 161.71, 140.7, 137.84, 137.83, 137.6, 133.5, 129.4, 128.4, 127.3, 125.2, 118.6, 118.5, 76.8, 76.7, 64.92, 64.90, 45.2, 45.1, 42.19, 42.17, 30.3, 22.5, 21.2, 18.37, 18.36; HRMS (FAB<sup>+</sup>) Calcd for  $\text{C}_{27}\text{H}_{32}\text{NO}_4\text{S}_2^+$  [M+H]<sup>+</sup> 498.1767, found 498.1773.

**10-Benzamido-10-methyl-14-methylene-3,6,9-trioxo-2-oxa-11,12-dithia-5,8-diazapentadecan-15-yl (2S)-2-(4-isobutylphenyl)propanoate (24)**

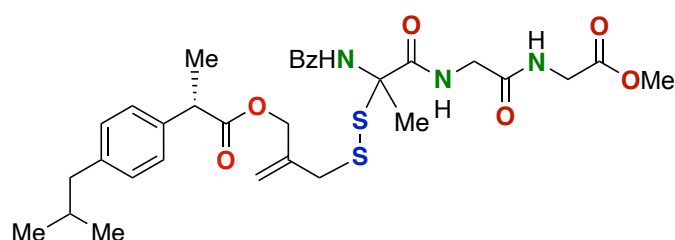

Isolated as a 1:1 mixture of diastereomers; Colorless oil; TLC  $R_f$  0.27 ( $\text{CHCl}_3/\text{MeOH} = 30/1$ );  $^1\text{H}$  NMR (400 MHz,  $\text{CDCl}_3$ )  $\delta$  7.88-7.78 (m, 3H+3H), 7.56-7.49 (m, 1H+1H), 7.48-7.40 (m, 2H+2H), 7.19-7.13 (m, 2H+2H), 7.10-7.03 (m, 2H+2H), 5.01-4.94 (m, 2H+2H), 4.60-4.46 (m, 2H+2H), 4.13-3.93 (m, 4H+4H), 3.75-3.63 (m, 4H+4H), 3.16 (s, 2H+2H), 2.43 (d,  $J = 7.1$  Hz, 2H+2H), 1.98 (s, 3H+3H), 1.89-1.75 (m, 1H+1H), 1.47 (d,  $J = 7.1$  Hz, 3H+3H), 0.87 (d,  $J = 6.6$  Hz, 6H+6H);  $^{13}\text{C}\{^1\text{H}\}$  NMR (150 MHz,  $\text{CD}_3\text{OD}$ )  $\delta$  175.8, 173.7, 172.1, 171.7, 169.8, 141.8, 140.40, 140.36, 139.22, 139.17, 134.7, 133.5, 130.4, 129.7, 129.0, 128.3, 117.6, 79.4, 71.4, 65.8, 52.7, 46.2, 46.0, 44.0, 42.9, 41.7, 31.4, 26.4, 22.7, 18.6; HRMS (FAB<sup>+</sup>) Calcd for  $\text{C}_{32}\text{H}_{42}\text{N}_3\text{O}_7\text{S}_2^+$  [M+H]<sup>+</sup> 644.2459, found 644.2460.

**Methyl (2-(allyldisulfanyl)-2-(2-((tert-butoxycarbonyl)amino)acetamido)-3-phenylpropanoyl)glycinate (26)**

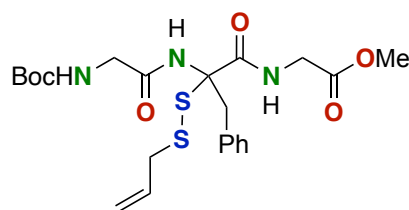

Colorless oil; TLC  $R_f$  0.46 ( $\text{CHCl}_3/\text{MeOH} = 40/1$ );  $^1\text{H}$  NMR (600 MHz,  $\text{CDCl}_3$ )  $\delta$  7.50 (br s, 1H), 7.27-7.21 (m, 3H), 7.13-7.08 (m, 2H), 7.14 (br s, 1H), 5.83-6.75 (m, 1H), 5.20-5.15 (m, 2H), 5.09 (br s, 1H), 4.15-4.03 (m, 3H), 3.81 (s, 3H), 3.76 (d,  $J = 5.6$  Hz, 2H), 3.38-3.30 (m, 3H), 1.43 (s, 9H);  $^{13}\text{C}\{^1\text{H}\}$  NMR (150 MHz,  $\text{CDCl}_3$ )  $\delta$  169.85, 169.76, 168.5, 156.0, 134.5, 132.7, 130.0, 128.6, 127.6, 119.6, 80.5, 72.4, 52.7, 45.1, 42.1, 42.0, 40.5, 28.4; HRMS (FAB<sup>+</sup>) Calcd for  $\text{C}_{22}\text{H}_{32}\text{N}_3\text{O}_6\text{S}_2^+$  [M+H]<sup>+</sup> 498.1727, found. 498.1734.

**TFA salt of methyl (2-(allyldisulfanyl)-2-(2-aminoacetamido)-3-phenylpropanoyl)glycinate (27·TFA)**

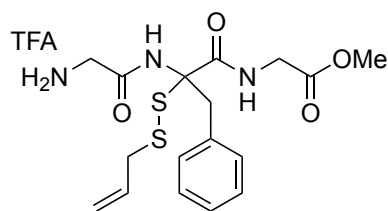

Isolated as the TFA salt with slight impurities. Orange oil;  $^1\text{H NMR}$  (400 MHz,  $\text{CD}_3\text{OD}$ )  $\delta$  7.27-7.17 (m, 5H), 5.91-5.77 (m, 1H), 5.22-5.10 (m, 2H), 4.08-3.67 (m, 7H), 3.52-3.32 (m, 4H);  $^{13}\text{C}\{^1\text{H}\}$  NMR (150 MHz,  $\text{CD}_3\text{OD}$ )  $\delta$  171.45, 171.43, 166.4, 135.7, 134.3, 131.4, 129.2, 124.1, 119.3, 73.8, 49.9, 43.0, 42.5, 42.2, 41.0; HRMS (FAB<sup>+</sup>) Calcd for  $\text{C}_{17}\text{H}_{24}\text{N}_3\text{O}_4\text{S}_2^+$   $[\text{M}+\text{H}]^+$  398.1203, found 398.1210.

**Methyl (2-(allyldisulfanyl)-2-(2-(2-(allyldisulfanyl)-2-benzamidopropanamido)acetamido)-3-phenylpropanoyl)glycinate (28)**

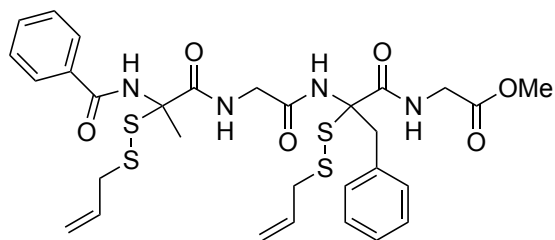

Isolated as a 1:1 mixture of diastereomers; Orange oil; TLC  $R_f$  0.45 ( $\text{CHCl}_3/\text{MeOH} = 20/1$ );  $^1\text{H NMR}$  (400 MHz,  $\text{CDCl}_3$ )  $\delta$  7.89-7.83 (m, 2H+2H), 7.57-7.51 (m, 1H+1H), 7.50-7.43 (m, 3H+3H), 7.26-7.20 (m, 2H+2H), 7.13-6.95 (m, 2H+2H), 6.27 (br s, 1H), 5.84-5.65 (m, 2H+2H), 5.55 (br s, 1H), 5.20-5.02 (m, 4H+4H), 4.13-4.00 (m, 2H+2H), 3.97-3.85 (m, 2H), 3.82-3.79 (m, 3H+3H), 3.78-3.70 (m, 2H), 3.37-3.21 (m, 6H+6H), 2.13-2.07 (m, 3H+3H);  $^{13}\text{C}\{^1\text{H}\}$  NMR (150 MHz,  $\text{CDCl}_3$ )  $\delta$  171.8, 171.7, 171.6, 169.58, 169.56, 169.55, 169.5, 166.80, 166.75, 165.8, 165.7, 165.6, 134.3, 134.2, 132.63, 132.60, 132.49, 132.45, 132.00, 131.96, 129.83, 129.75, 129.73, 128.7, 128.50, 128.46, 127.59, 127.55, 127.3, 127.1, 127.0, 123.6, 119.4, 119.33, 119.30, 119.2, 72.6, 72.5, 68.5, 68.40, 68.39, 52.62, 52.61, 52.59, 52.58, 44.3, 44.2, 43.1, 42.03, 41.95, 41.90, 41.87, 41.84, 41.75, 41.0, 40.54, 40.48, 23.41, 23.36, 23.34; HRMS (FAB<sup>+</sup>) Calcd for  $\text{C}_{30}\text{H}_{37}\text{N}_4\text{O}_6\text{S}_4^+$   $[\text{M}+\text{H}]^+$  677.1590, found 677.1590.

**(2S)-1-((2-(Allyldisulfanyl)-2-benzamidopropanoyl)glycylglycyl-L-valyl-L-leucyl-L-valyl-L-glutamyl)-N-(2-amino-2-oxoethyl)pyrrolidine-2-carboxamide (30)**

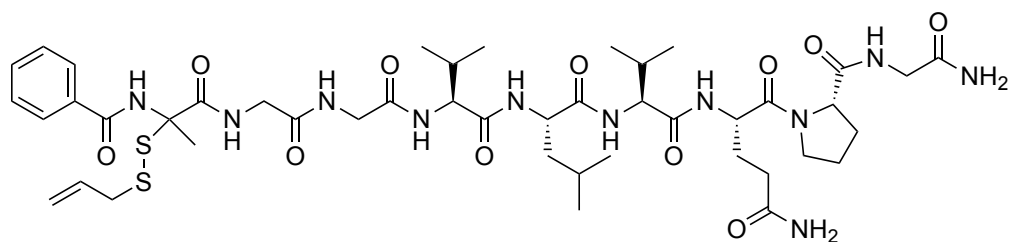

Isolated as a 1:1 mixture of diastereomers; Colorless solid; m.p. 155-158 °C; TLC  $R_f$  0.45 (CHCl<sub>3</sub>/MeOH = 5/1); <sup>1</sup>H NMR (400 MHz, CD<sub>3</sub>OD) δ 8.02-7.96 (m, 2H+2H), 7.63-7.57 (m, 1H+1H), 7.54-7.47 (m, 2H+2H), 5.83-5.69 (m, 1H+1H), 5.09-4.98 (m, 2H+2H), 4.61-4.56 (m, 1H+1H), 4.40-4.30 (m, 2H+2H), 4.12-4.08 (m, 1H+1H), 4.01-3.91 (m, 3H+3H), 3.77-3.69 (m, 4H+4H), 3.29-3.19 (m, 4H+4H), 2.39-2.03 (m, 8H+8H), 1.95-1.92 (m, 5H+5H), 1.75-1.58 (m, 3H+3H), 1.05-0.83 (m, 18H+18H); <sup>13</sup>C{<sup>1</sup>H} NMR (150 MHz, CD<sub>3</sub>OD) δ 177.83, 177.80, 175.1, 175.0, 174.67, 174.61, 174.4, 174.3, 174.1, 173.9, 172.82, 172.77, 172.50, 172.47, 172.2, 172.1, 170.2, 170.1, 163.3, 163.1, 134.61, 134.58, 134.21, 134.16, 133.62, 133.56, 129.7, 129.13, 129.11, 119.3, 119.1, 79.5, 71.8, 71.5, 71.4, 62.4, 62.3, 61.8, 61.6, 55.8, 53.5, 53.3, 52.0, 51.9, 44.7, 43.9, 43.8, 43.7, 43.53, 43.25, 43.21, 41.12, 41.07, 31.9, 31.8, 31.3, 31.2, 30.5, 30.4, 28.2, 28.1, 26.9, 26.3, 26.13, 26.12, 25.8, 23.6, 23.5, 21.6, 21.4, 19.75, 19.73, 19.68, 19.1, 19.0, 18.7, 17.3, 13.1; HRMS (FAB<sup>+</sup>) Calcd for C<sub>45</sub>H<sub>70</sub>N<sub>11</sub>O<sub>11</sub>S<sub>2</sub><sup>+</sup> [M+H]<sup>+</sup> 1004.4692, found 1004.4711.

### References for Supporting Information

- S1 A. D. Melhado, M. Luparia, F. D. Toste, *J. Am. Chem. Soc.* **2007**, *129*, 12638-12639.  
S2 H. Zhang, Z. Yang, B. N. Zhao, G. Li, *J. Org. Chem.* **2018**, *83*, 644-655.  
S3 S. Peddibhotla, J. J. Tepe, *Synthesis* **2003**, *9*, 1433-1440.  
S4 D. N. Meyer, M. A. Cortés González, X. Jiang, L. Johansson-Holm, M. P. Lati, M. Elgland, P. Nordeman, G. Antoni, K. J. Szabó, *Chem. Commun.* **2021**, *57*, 8476-8479.  
S5 A. J. Metrano, S. J. Miller, *J. Org. Chem.* **2014**, *79*, 1542-1554.  
S6 H. Asanuma, K. Kanemoto, T. Watanabe, S-i. Fukuzawa, *Angew. Chem. Int. Ed.* **2023**, *62*, e202219156.  
S7 J. Zou, J. Chen, T. Shi, Y. Hou, F. Cao, Y. Wang, X. Wang, Z. Jia, Q. Zhao, Z. Wang, *ACS Catal.* **2019**, *9*, 11426-11430.  
S8 H. Asanuma, K. Kanemoto, *Org. Lett.* **2024**, *26*, 438-443.  
S9 W.-C. Gao, J. Tian, Y.-Z. Shang, X. Jiang, *Chem. Sci.* **2020**, *11*, 3903-3908.  
S10 N. Ogawa, S. Furukawa, Y. Kosugi, T. Takazawa, N. Kanomata, *Chem. Commun.* **2020**, *56*, 12917-12920.  
S11 R. Cain, J. Brem, D. Zollman, M. A. McDonough, R. M. Johnson, J. Spencer, A. Makena, M. I. Abboud, S. Cahill, S. Y. Lee, P. J. McHugh, C. J. Schofield, C. W. G. Fishwick, *J. Med. Chem.* **2018**, *61*, 1255-1260.  
S12 P. Prasad, I. Khan, P. Kondaiah, A. R. Chakravarty, *Chem. Eur. J.* **2013**, *19*, 17445-17455.  
S13 D. Uraguchi, Y. Asai, T. Ooi, *Angew. Chem. Int. Ed.* **2009**, *48*, 733-737.



# <sup>1</sup>H and <sup>13</sup>C NMR Spectra of Compounds

<sup>1</sup>H NMR (400 MHz) and <sup>13</sup>C NMR (101 MHz) spectra of *N*-(4-(5-oxo-2-phenyl-4,5-dihydrooxazol-4-yl)butyl)benzamide (**1c**) (CDCl<sub>3</sub>)

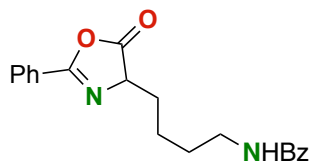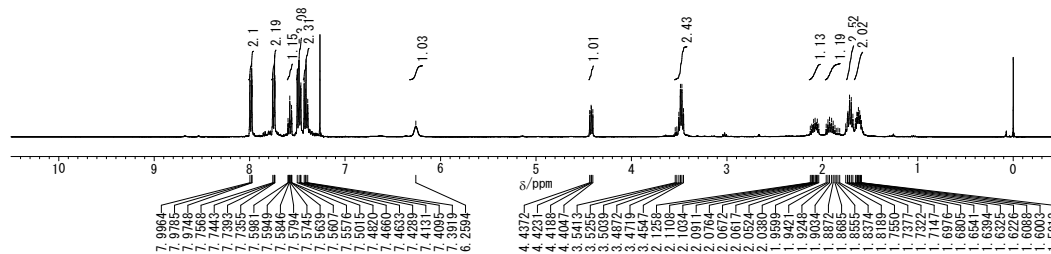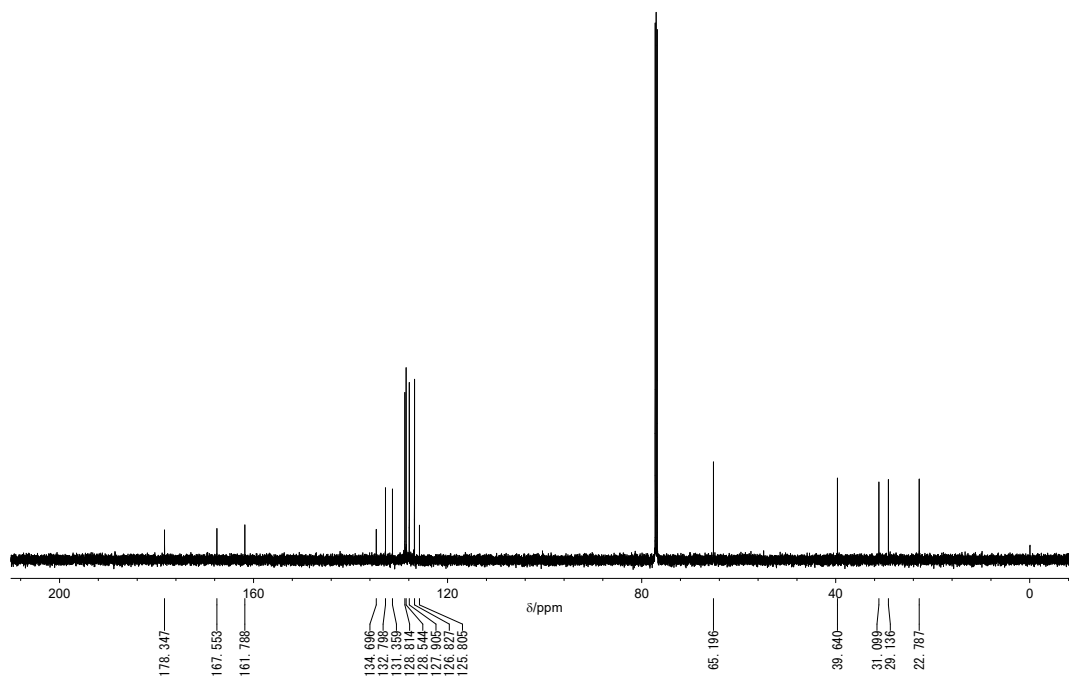

$^1\text{H}$  NMR (400 MHz) and  $^{13}\text{C}$  NMR (150 MHz) spectra of 4-(allyldisulfanyl)-4-methyl-2-phenyloxazol-5(4*H*)-one (**3aa**) ( $\text{CDCl}_3$ )

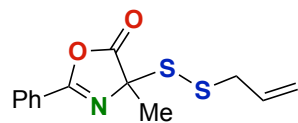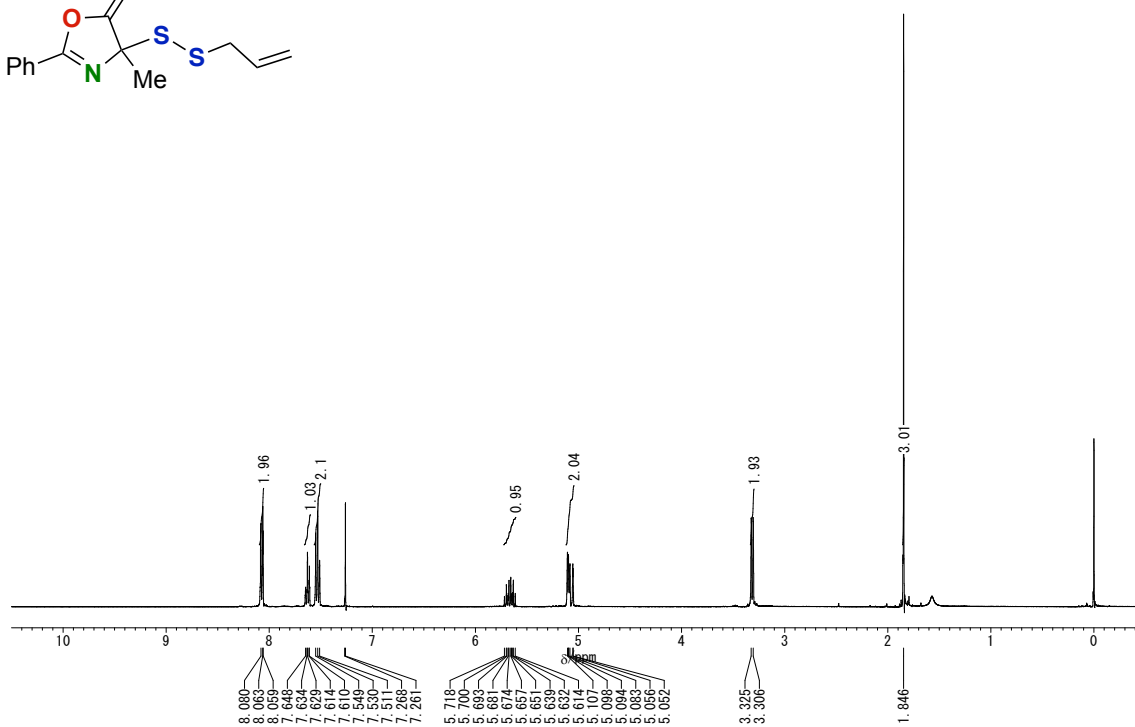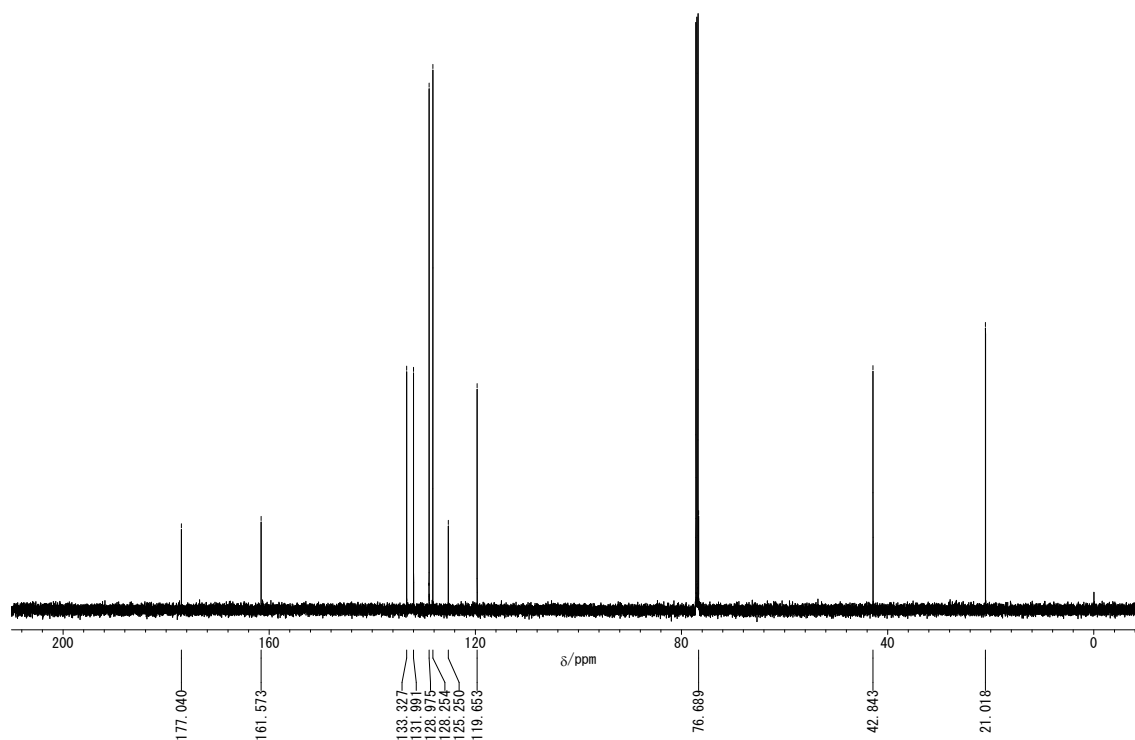

$^1\text{H}$  NMR (400 MHz) and  $^{13}\text{C}$  NMR (101 MHz) spectra of 4-(allyldisulfanyl)-4-(2-(methylthio)ethyl)-2-phenyloxazol-5(4*H*)-one (**3ba**) ( $\text{CDCl}_3$ )

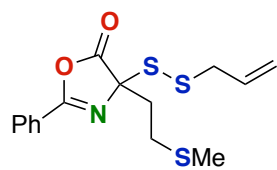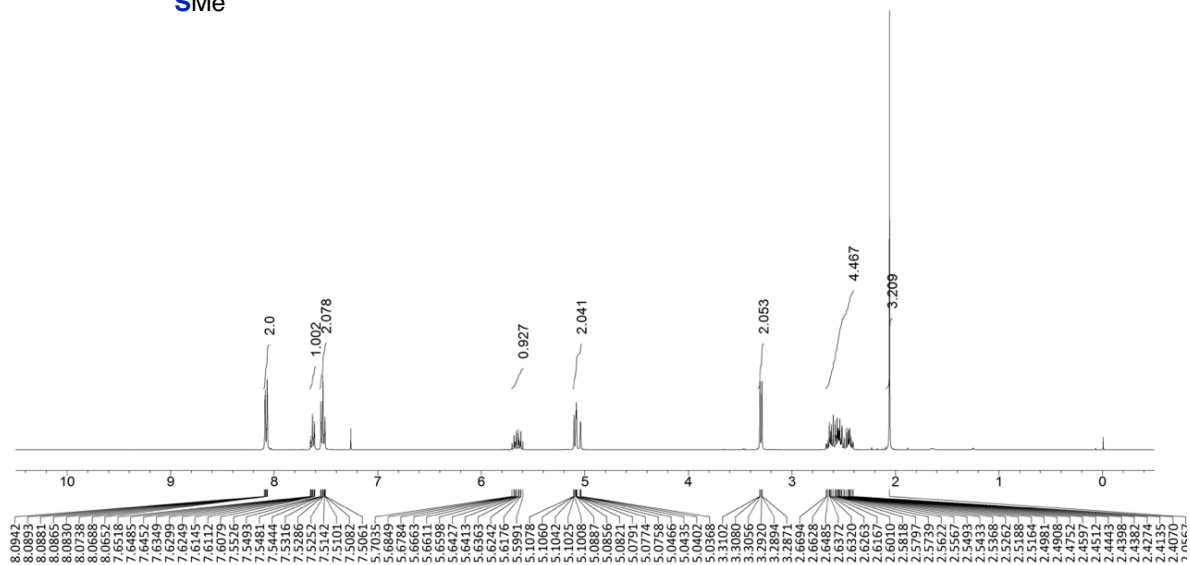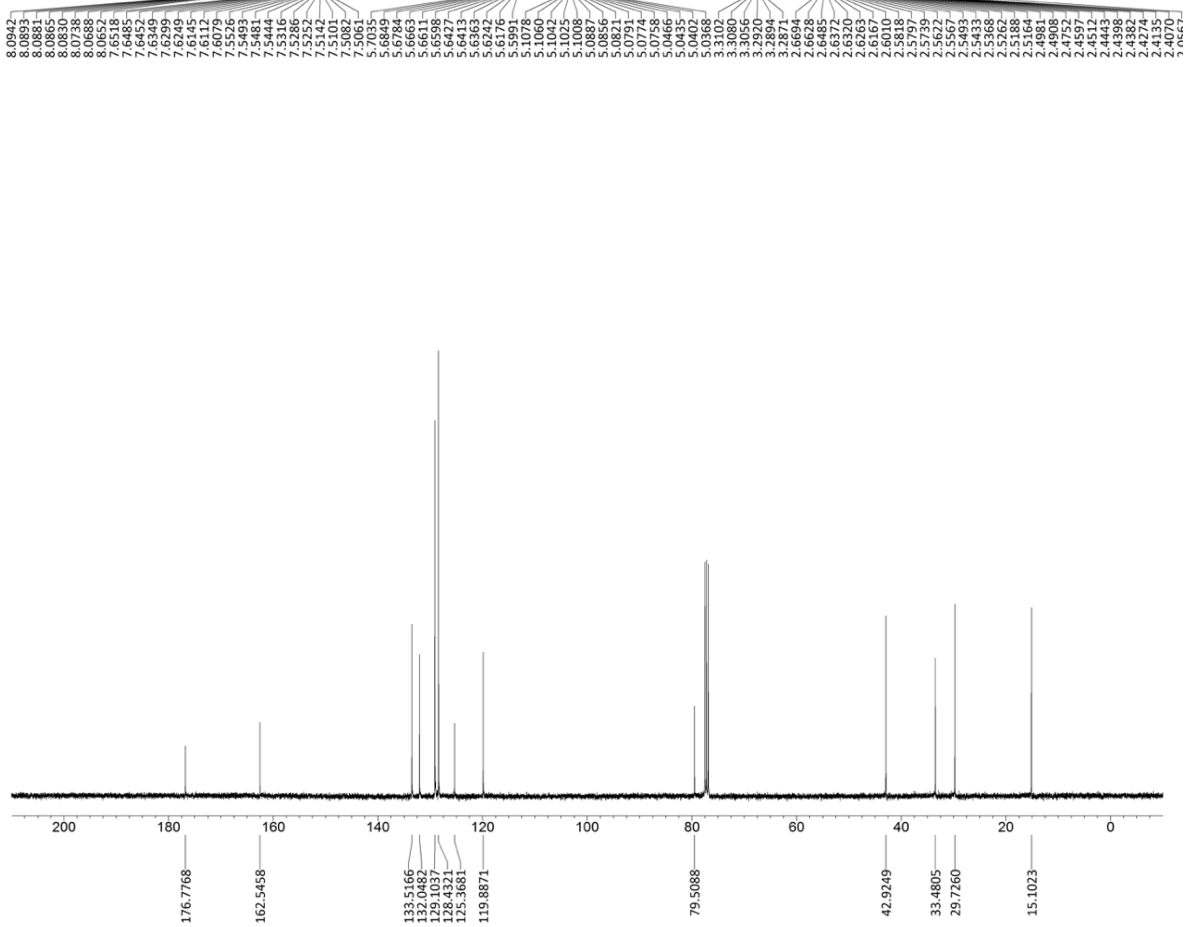

$^1\text{H}$  NMR (400 MHz) and  $^{13}\text{C}$  NMR (101 MHz) spectra of *N*-(4-(4-(allyldisulfanyl)-5-oxo-2-phenyl-4,5-dihydrooxazol-4-yl)butyl)benzamide (**3ca**) ( $\text{CDCl}_3$ )

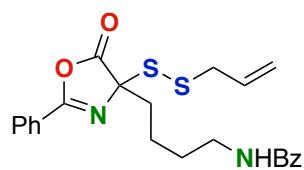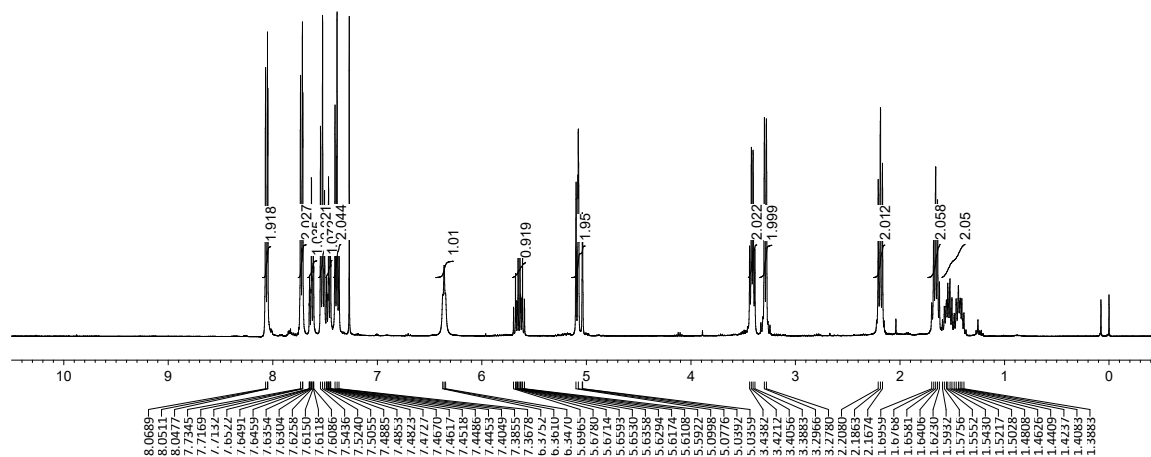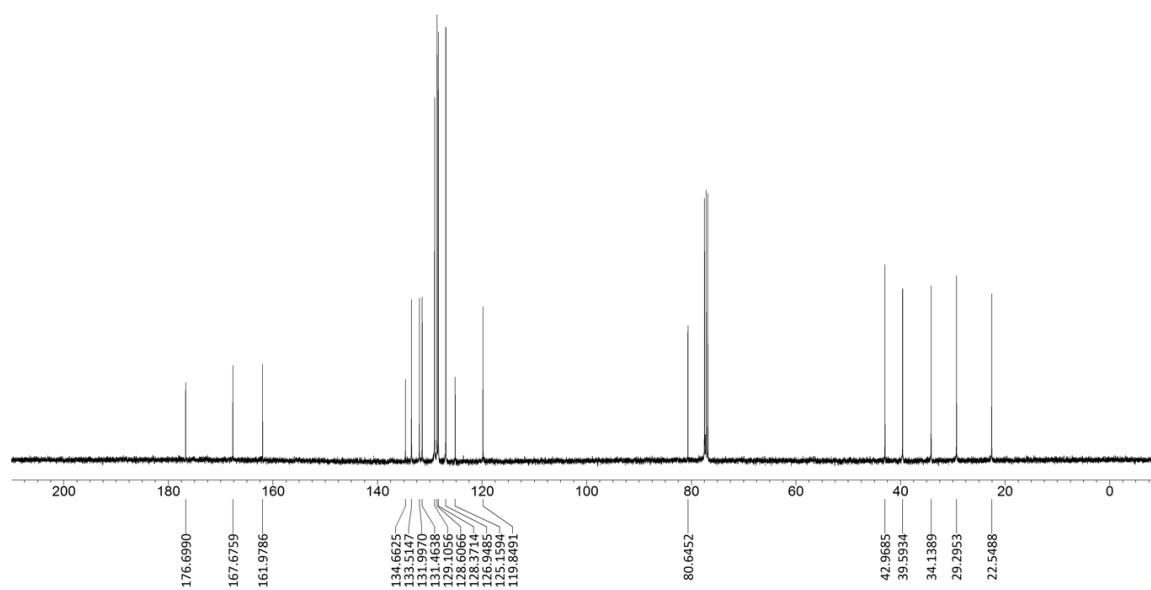

$^1\text{H}$  NMR (400 MHz) and  $^{13}\text{C}$  NMR (101 MHz) spectra of 4-(allyldisulfanyl)-4-isobutyl-2-phenyloxazol-5(4*H*)-one (**3da**) ( $\text{CDCl}_3$ )

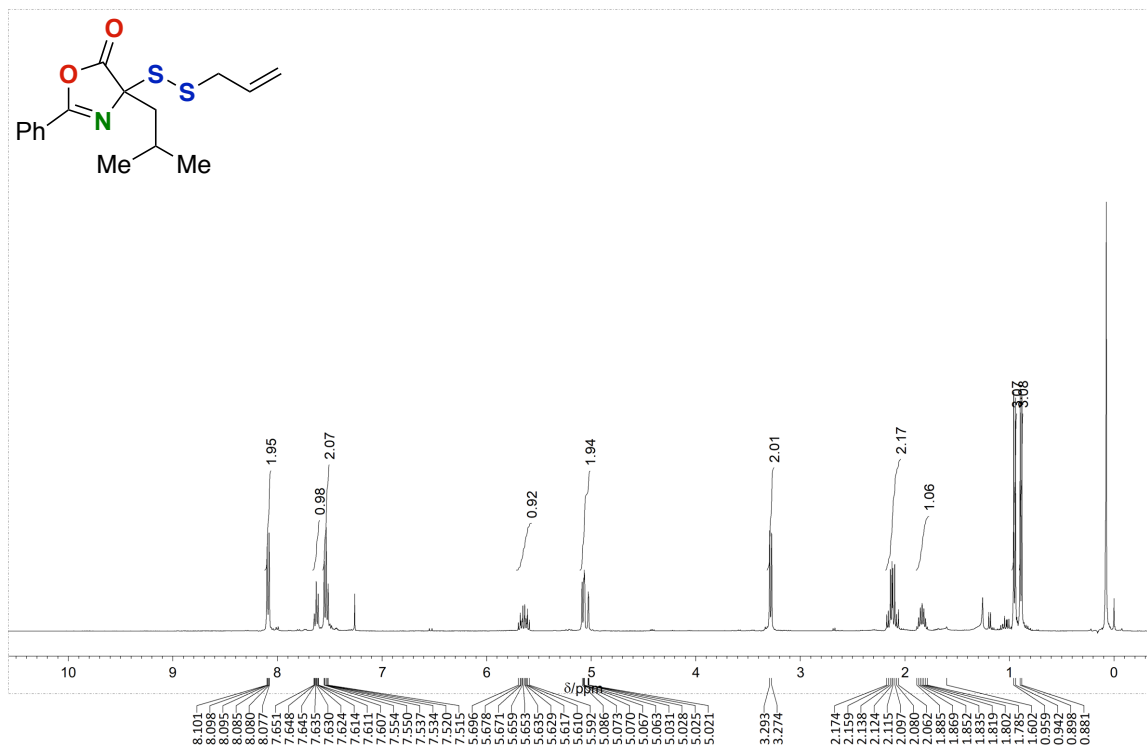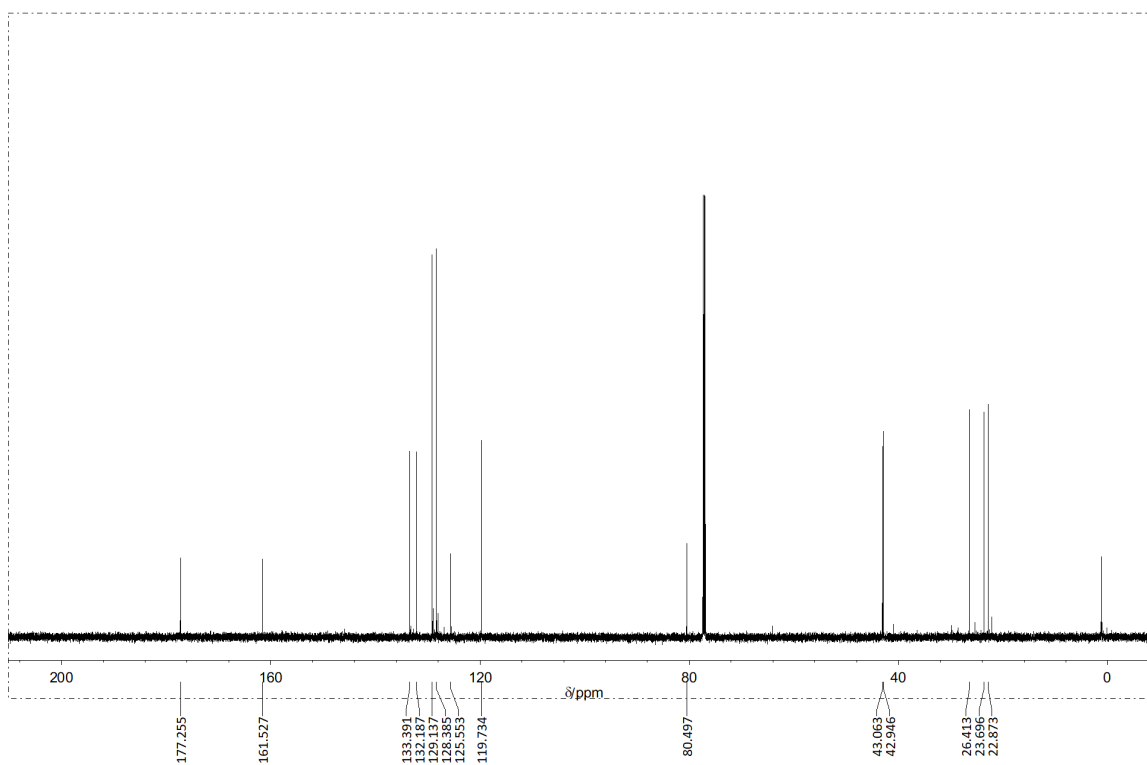

$^1\text{H}$  NMR (400 MHz) and  $^{13}\text{C}$  NMR (101 MHz) spectra of 4-(allyldisulfanyl)-4-benzyl-2-phenyloxazol-5(4*H*)-one (**3ea**) ( $\text{CDCl}_3$ )

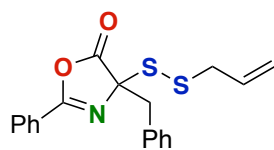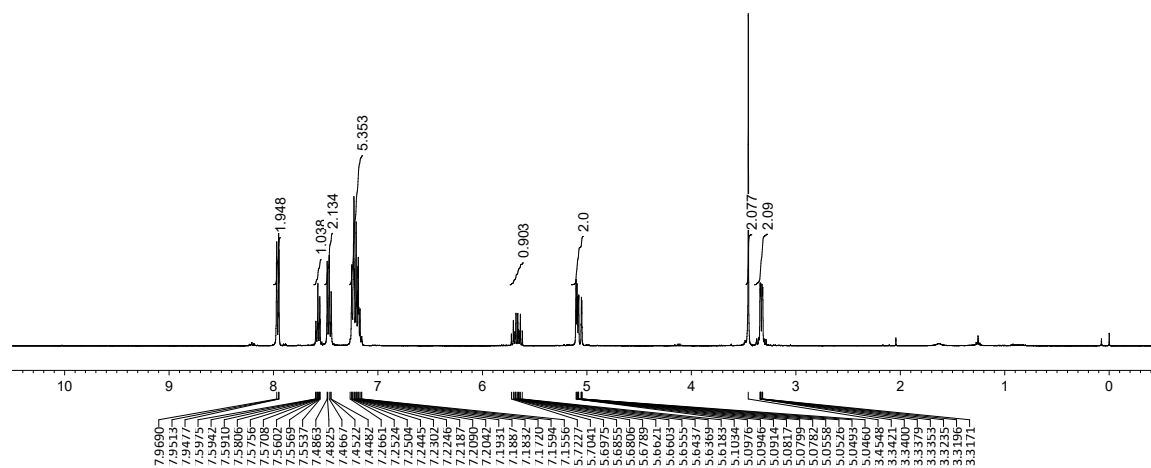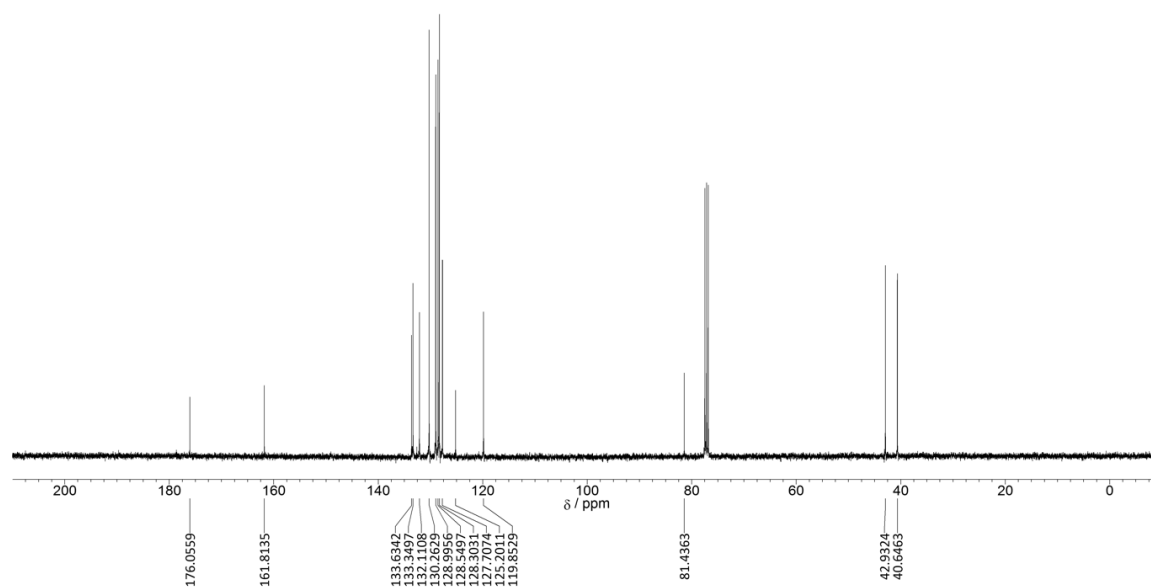

$^1\text{H}$  NMR (400 MHz) and  $^{13}\text{C}$  NMR (101 MHz) spectra of 4-((1*H*-indol-3-yl)methyl)-4-(allyldisulfanyl)-2-phenyloxazol-5(4*H*)-one (**3fa**) ( $\text{CDCl}_3$ )

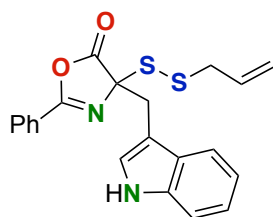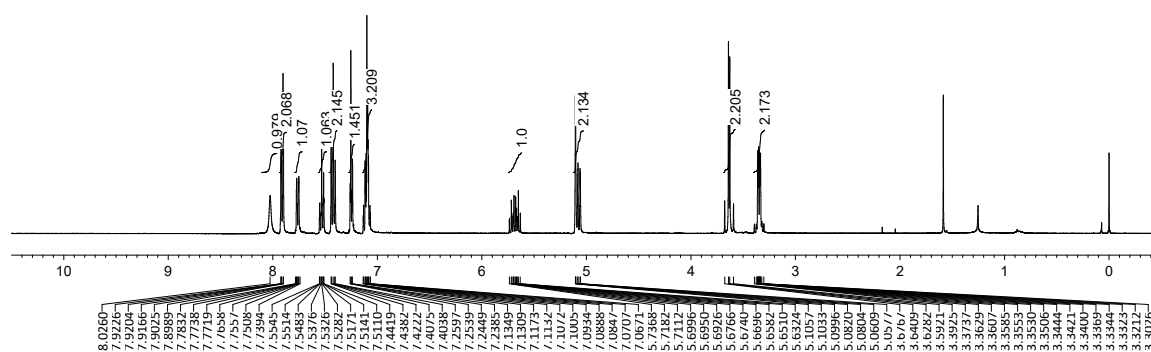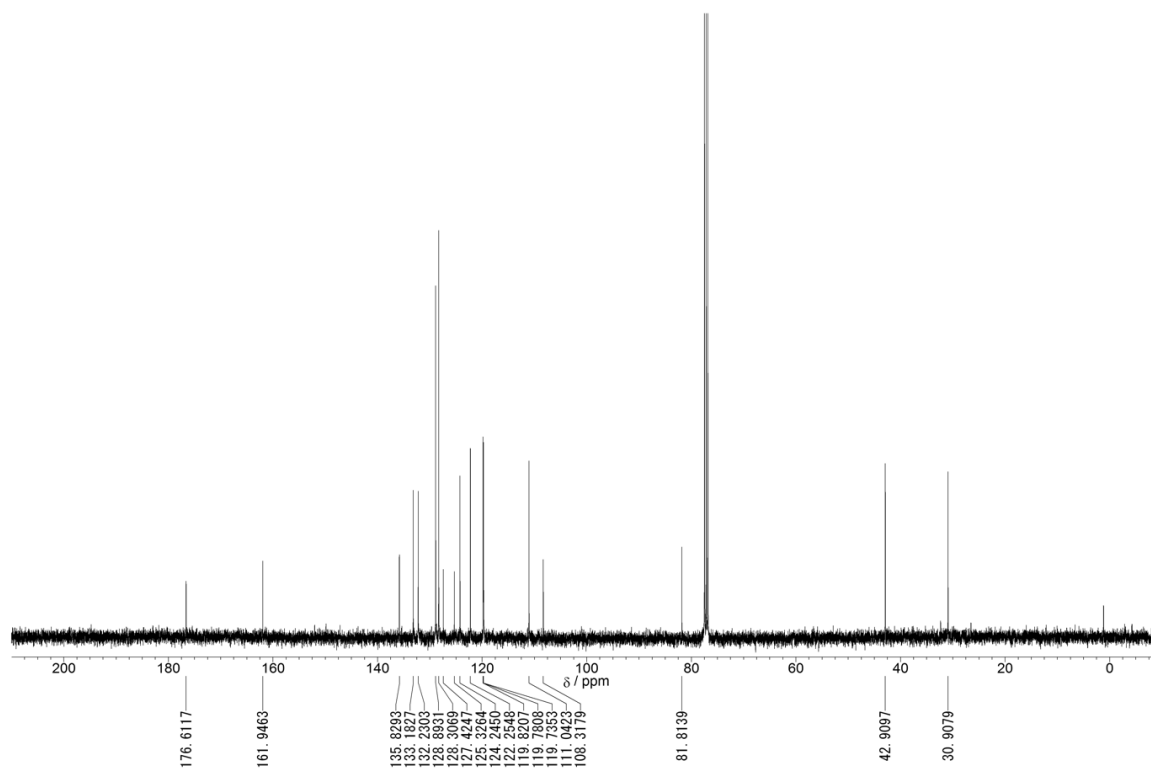

$^1\text{H}$  NMR (400 MHz) and  $^{13}\text{C}$  NMR (101 MHz) spectra of 4-(allyldisulfanyl)-4-isopropyl-2-phenyloxazol-5(4*H*)-one (**3ga**) ( $\text{CDCl}_3$ )

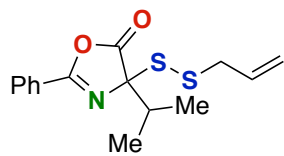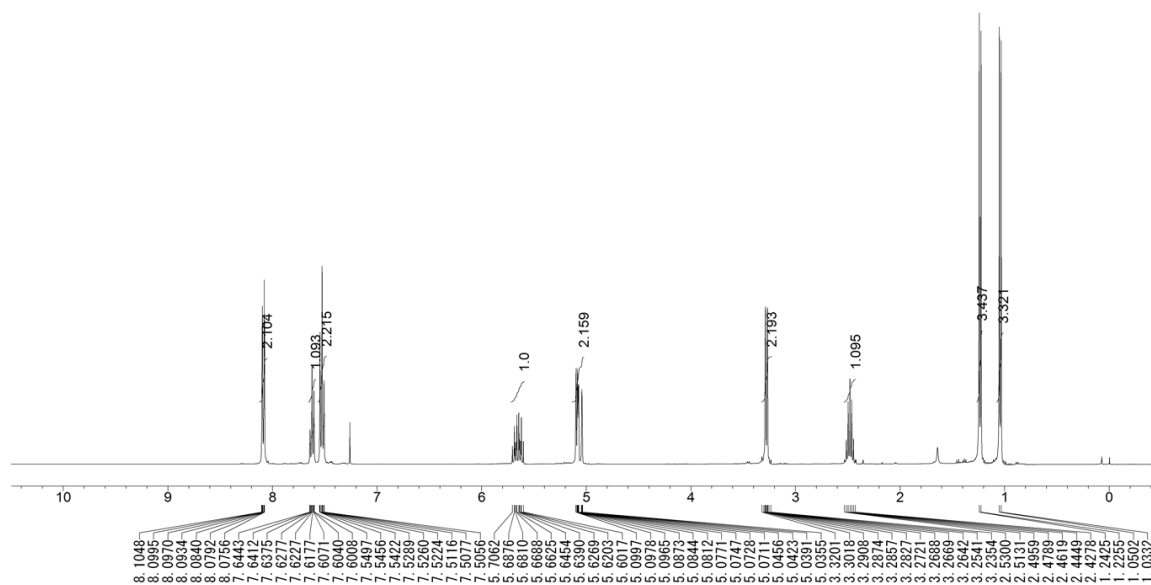



$^1\text{H}$  NMR (400 MHz) and  $^{13}\text{C}$  NMR (101 MHz) spectra of 4-(allyldisulfanyl)-4-ethyl-2-phenyloxazol-5(4*H*)-one (**3ha**) ( $\text{CDCl}_3$ )

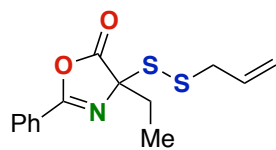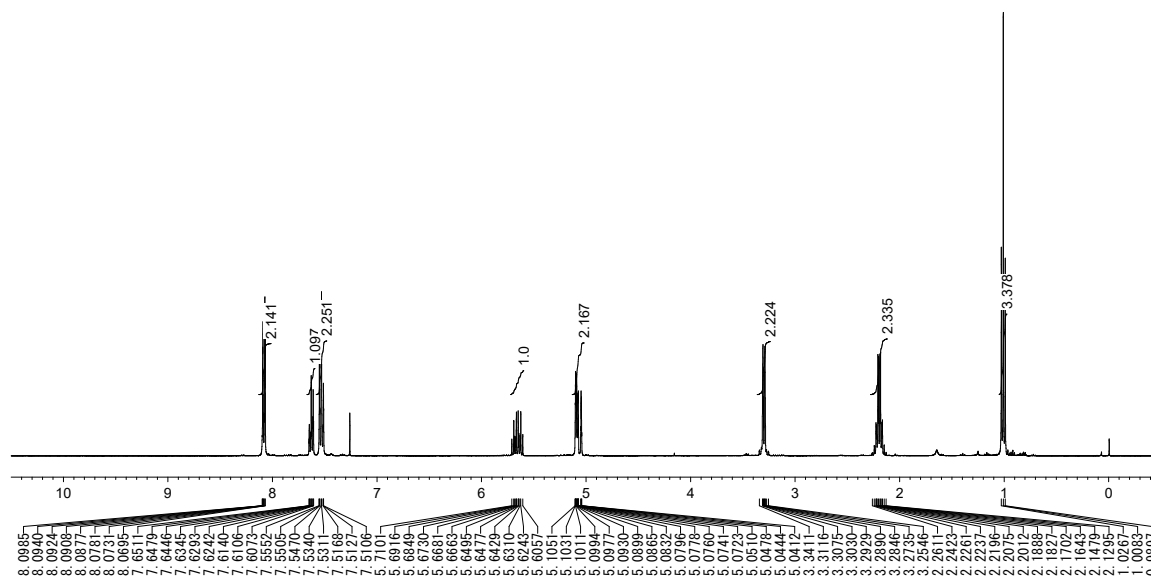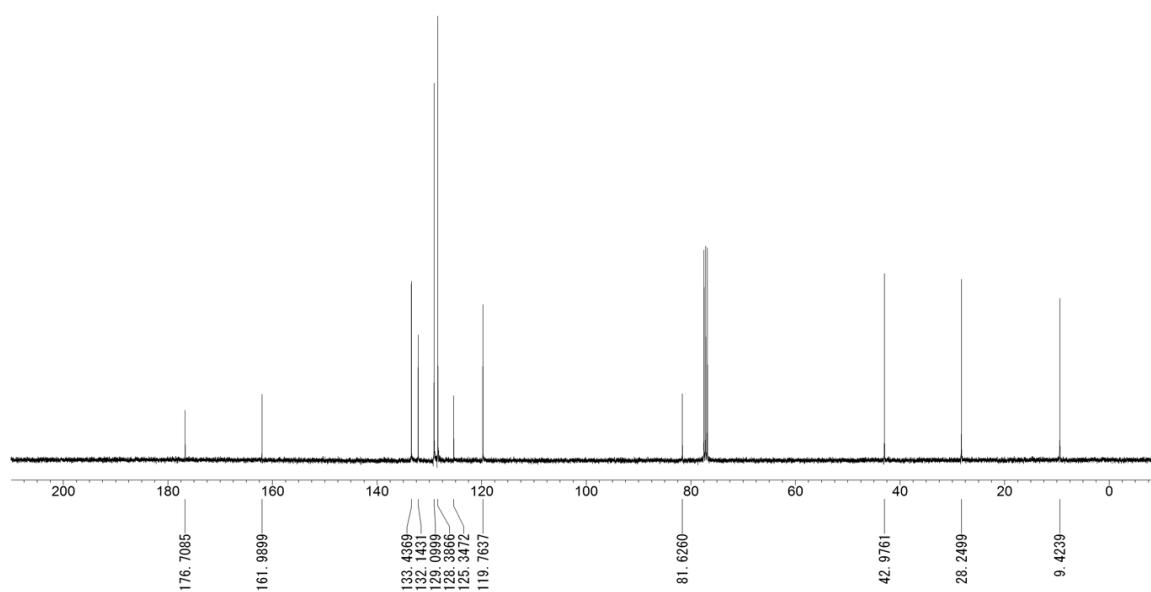

$^1\text{H}$  NMR (400 MHz) and  $^{13}\text{C}$  NMR (150 MHz) spectra of 4-allyl-4-(allyldisulfanyl)-2-phenyloxazol-5(4*H*)-one (**3ia**) ( $\text{CDCl}_3$ )

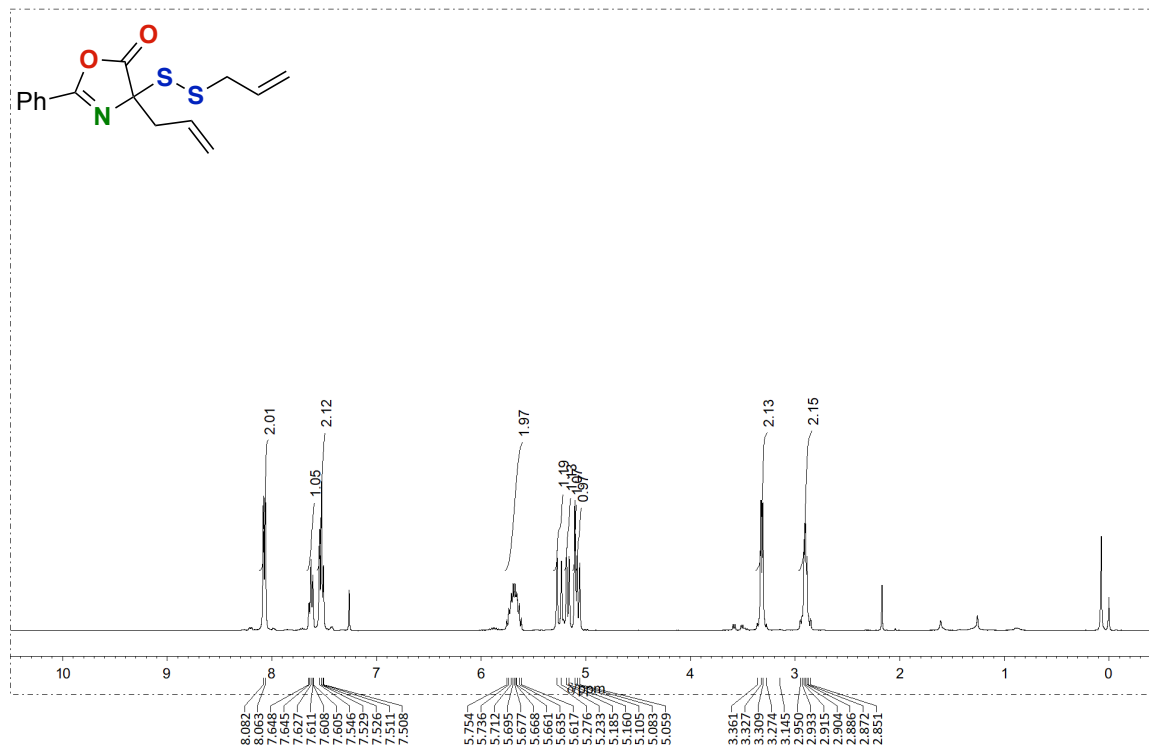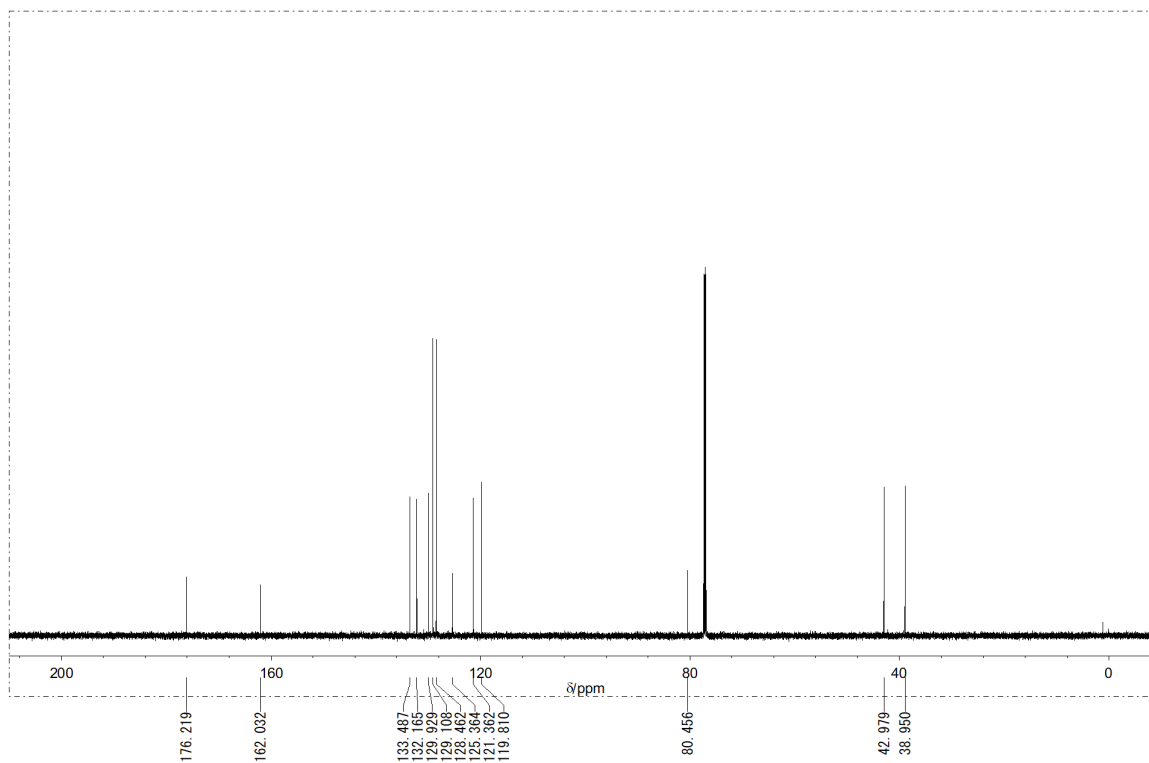

$^1\text{H}$  NMR (400 MHz) and  $^{13}\text{C}$  NMR (150 MHz) spectra of 4-(allyldisulfanyl)-2-(4-chlorophenyl)-4-methyloxazol-5(4*H*)-one (**3ja**) ( $\text{CDCl}_3$ )

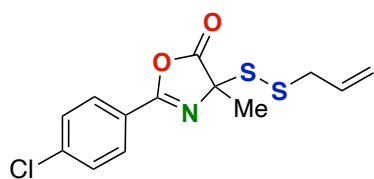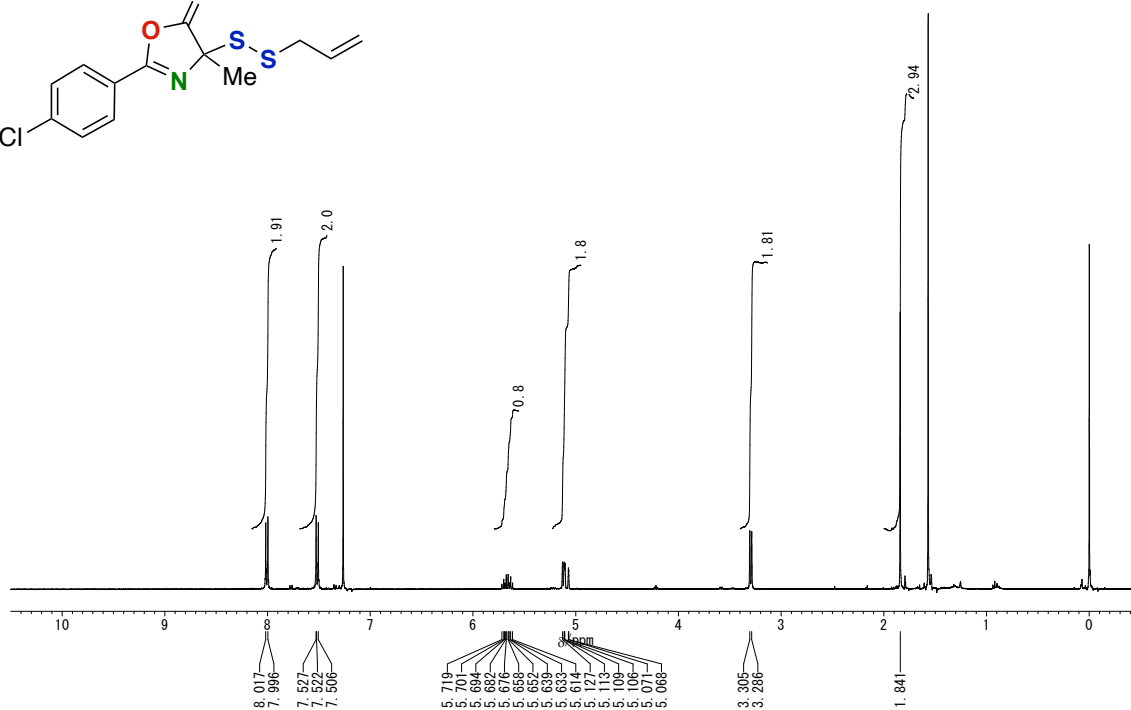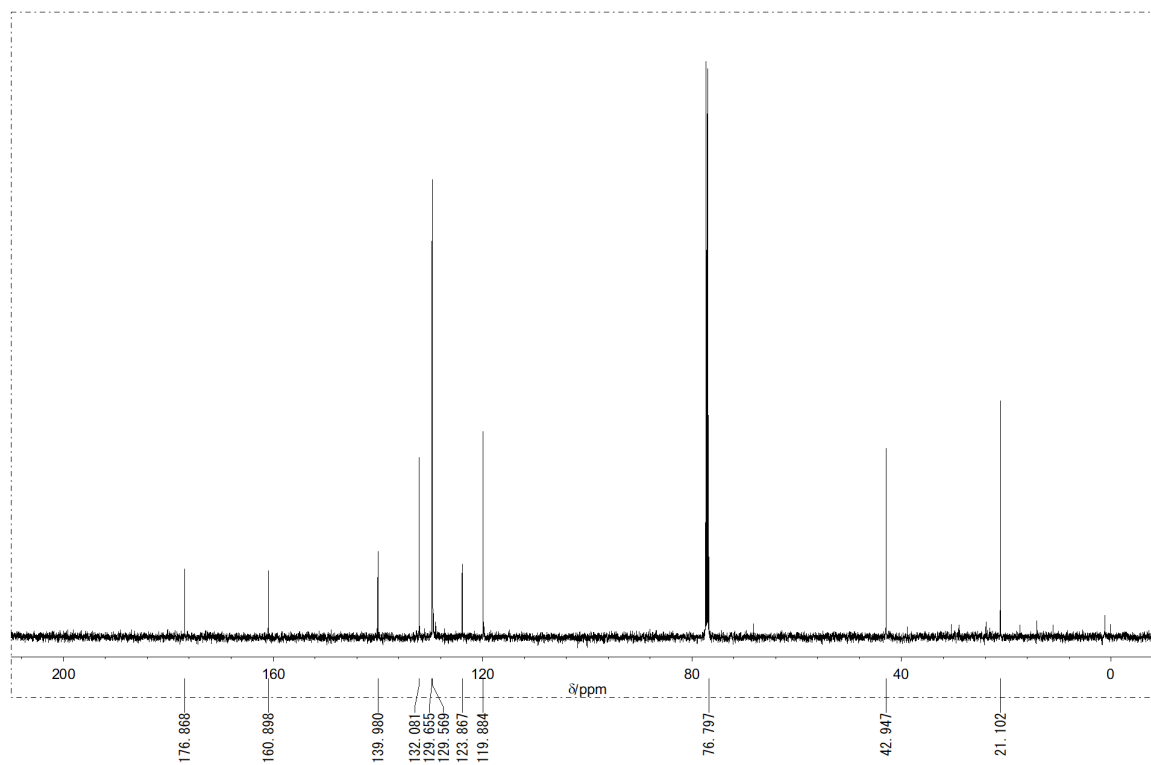

$^1\text{H}$  NMR (400 MHz) and  $^{13}\text{C}$  NMR (150 MHz) spectra of *tert*-butyl ((4-(allyldisulfanyl)-4-benzyl-5-oxo-4,5-dihydrooxazol-2-yl)methyl)carbamate (**3ka**) ( $\text{CDCl}_3$ )

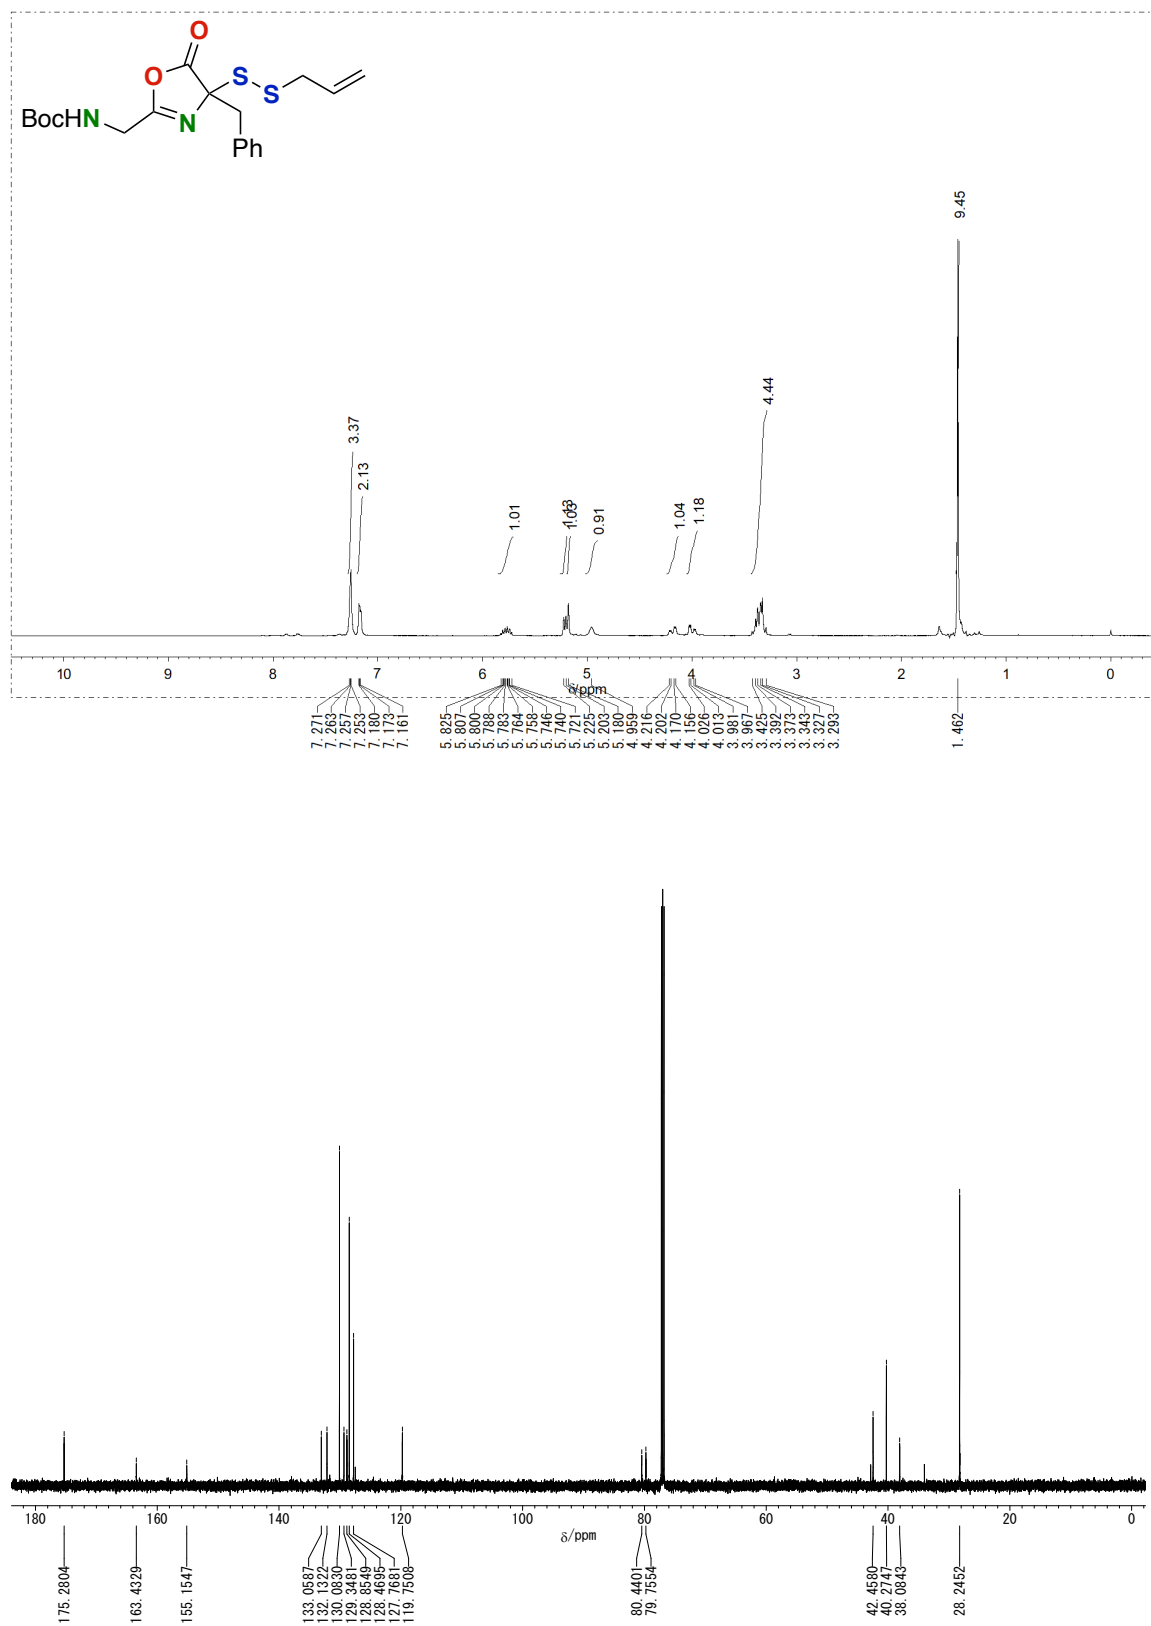

$^1\text{H}$  NMR (400 MHz) and  $^{13}\text{C}$  NMR (101 MHz) spectra of 4-methyl-4-((2-methylallyl)disulfanyl)-2-phenyloxazol-5(4*H*)-one (**3ab**) ( $\text{CDCl}_3$ )

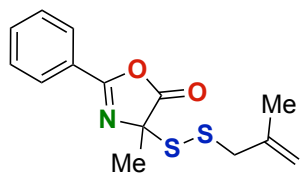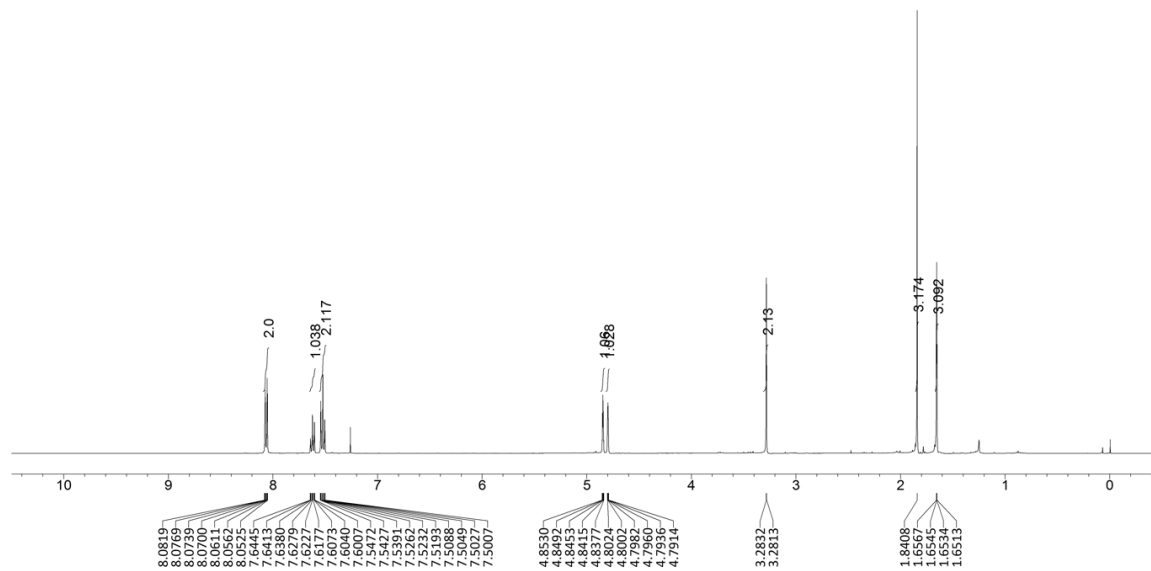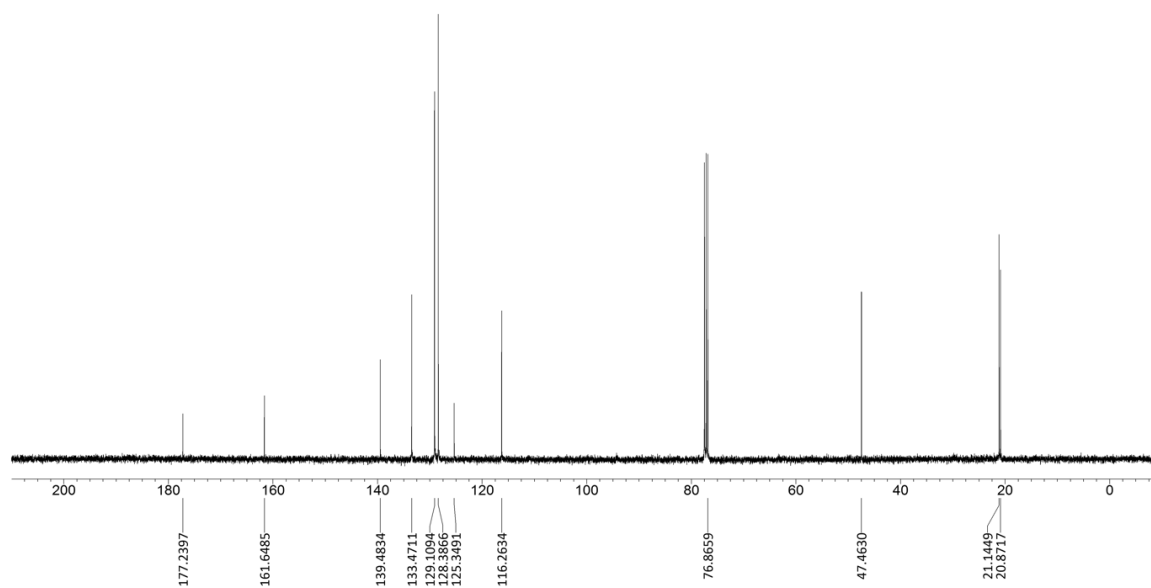

$^1\text{H}$  NMR (400 MHz) and  $^{13}\text{C}$  NMR (101 MHz) spectra of 4-((2-bromoallyl)disulfanyl)-4-methyl-2-phenyloxazol-5(4*H*)-one (**3ac**) ( $\text{CDCl}_3$ )

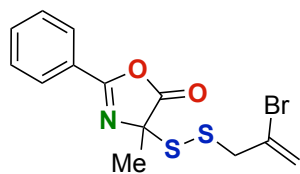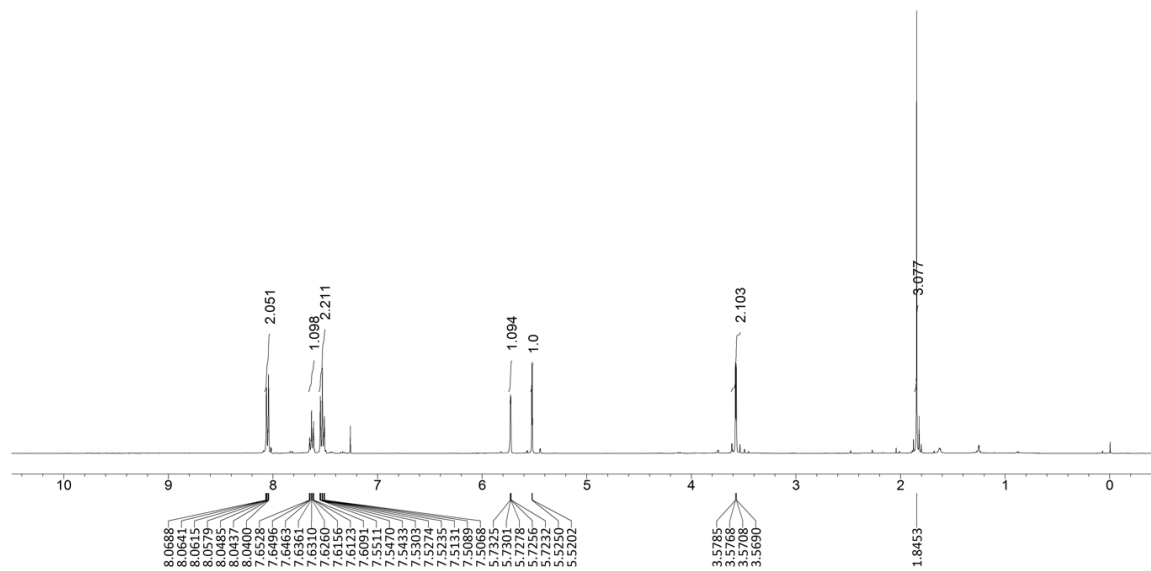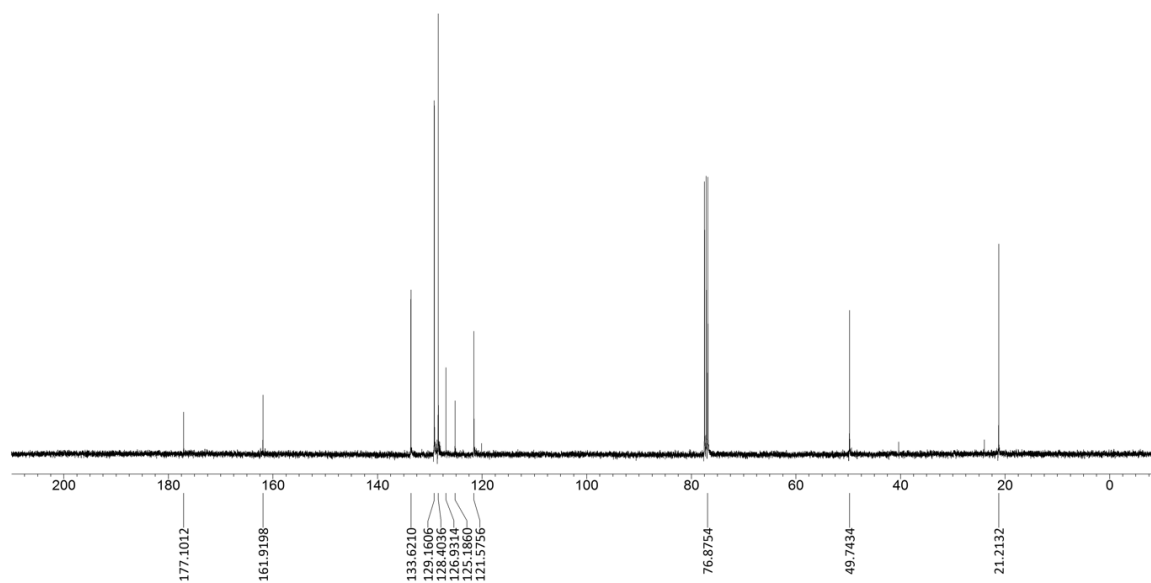

$^1\text{H}$  NMR (600 MHz) and  $^{13}\text{C}$  NMR (150 MHz) spectra of 4-(dodecyldisulfanyl)-4-methyl-2-phenyloxazol-5(4*H*)-one (**3ad**) ( $\text{CDCl}_3$ )

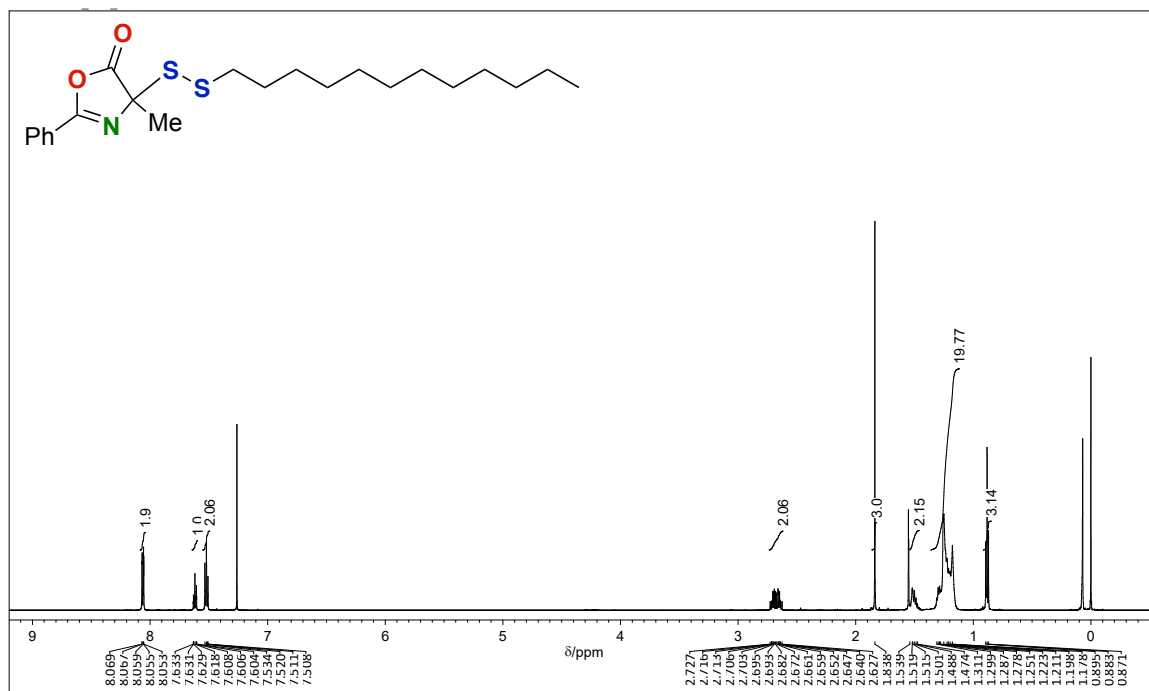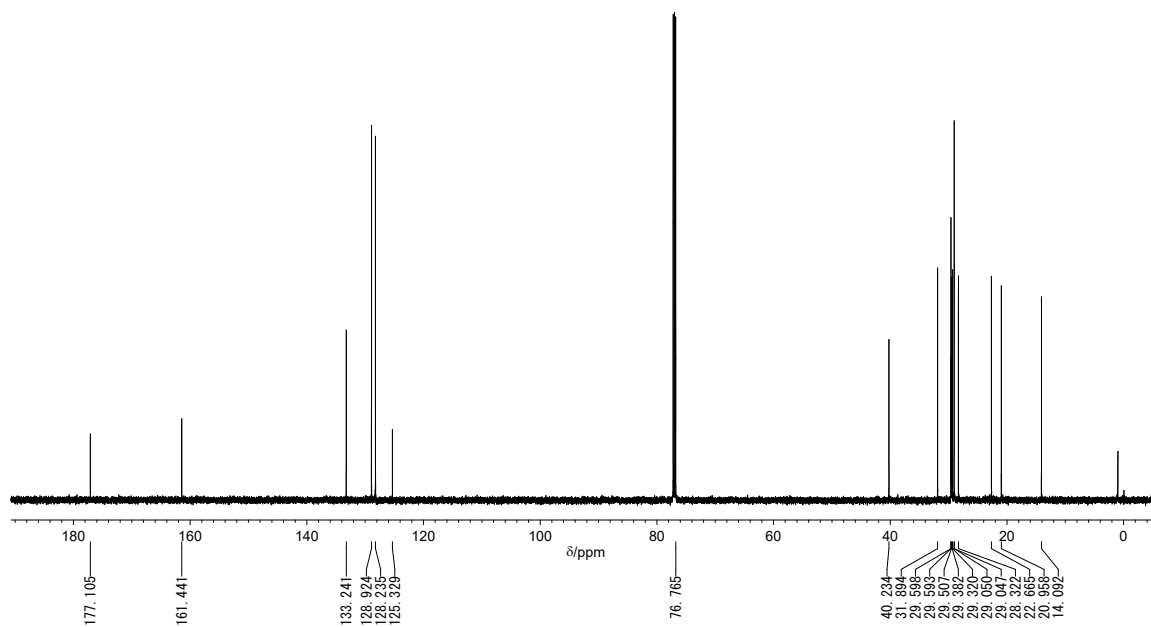

$^1\text{H}$  NMR (400 MHz) and  $^{13}\text{C}$  NMR (101 MHz) spectra of 4-(*tert*-butyldisulfanyl)-4-methyl-2-phenyloxazol-5(4*H*)-one (**3ae**) ( $\text{CDCl}_3$ )

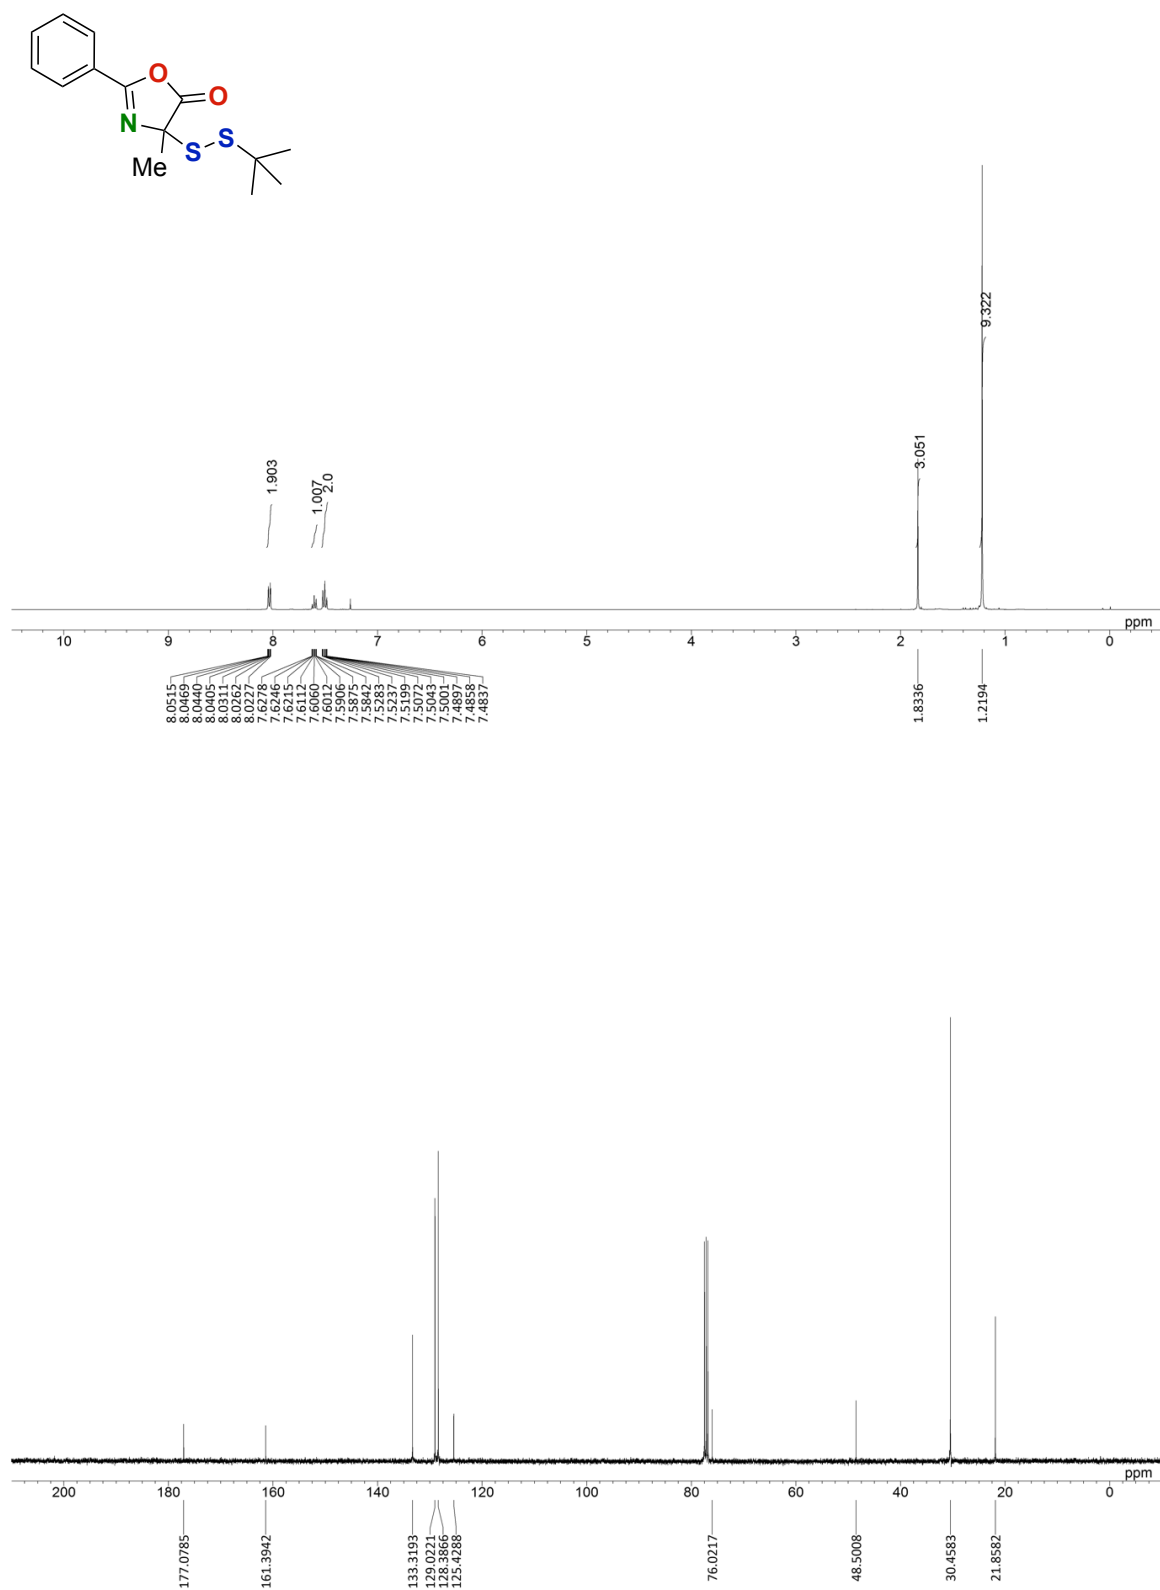



$^1\text{H}$  NMR (400 MHz) and  $^{13}\text{C}$  NMR (101 MHz) spectra of 4-((4-methoxybenzyl)disulfanyl)-4-methyl-2-phenyloxazol-5(4*H*)-one (**3af**) ( $\text{CDCl}_3$ )

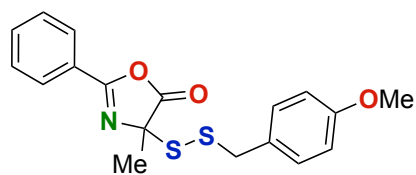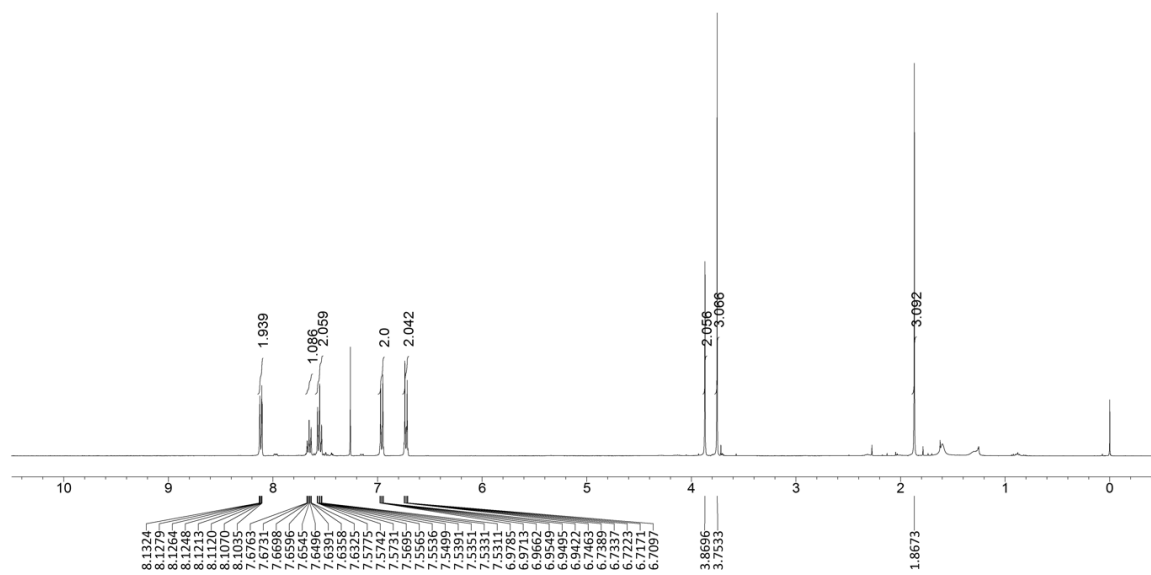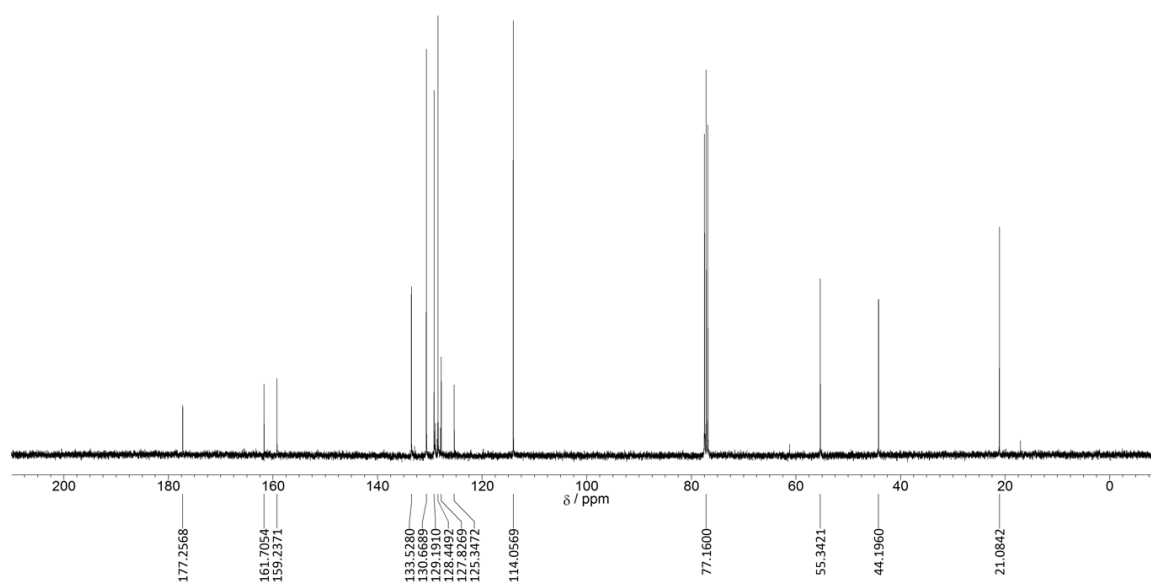

$^1\text{H}$  NMR (400 MHz) and  $^{13}\text{C}$  NMR (150 MHz) spectra of methyl *N*-(*tert*-butoxycarbonyl)-*S*-((4-methyl-5-oxo-2-phenyl-4,5-dihydrooxazol-4-yl)thio)-L-cysteinate (**3ag**) ( $\text{CDCl}_3$ )

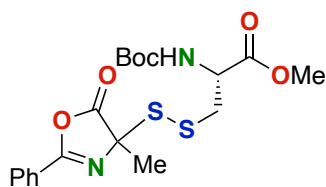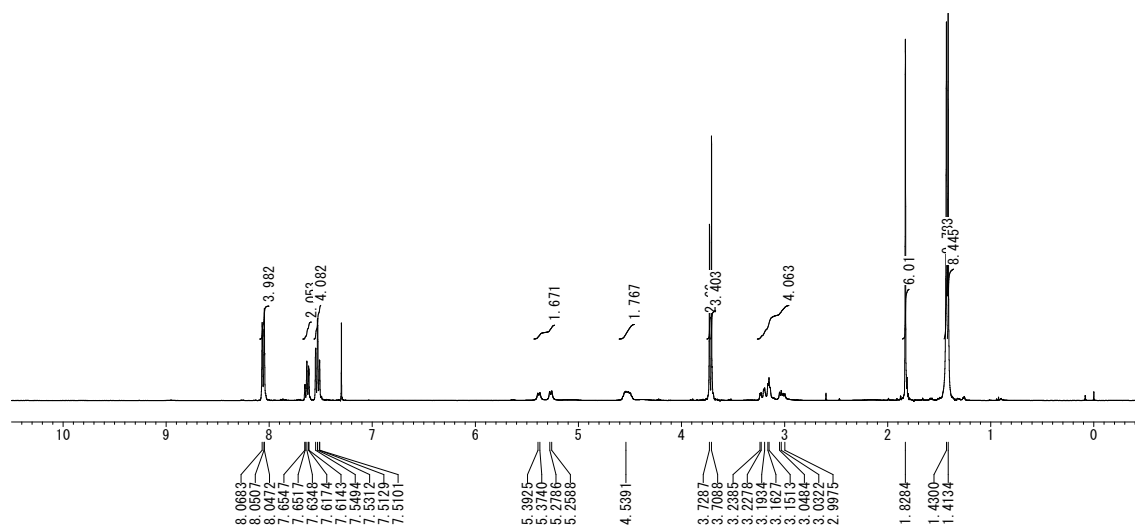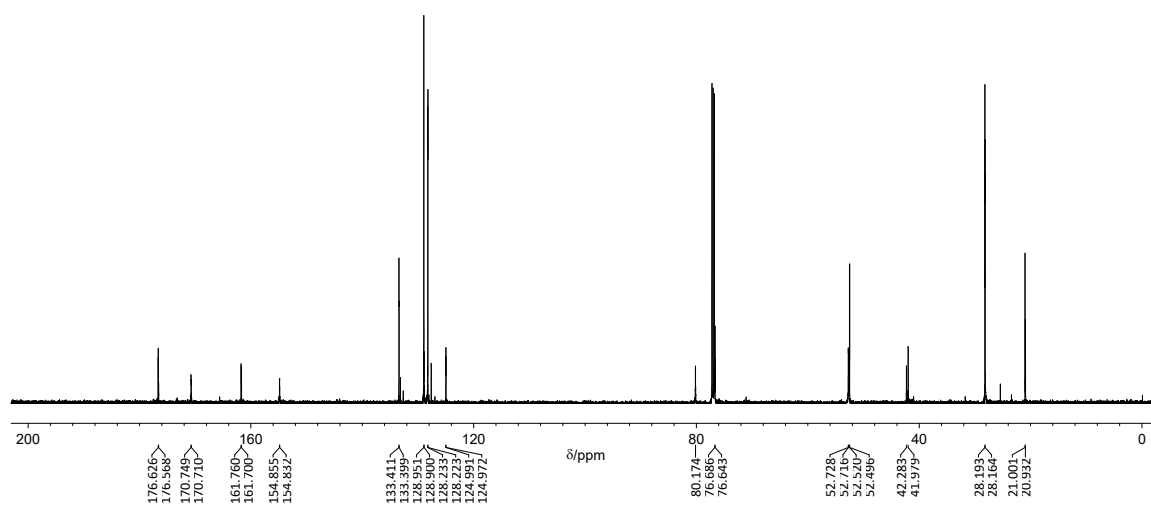

$^1\text{H}$  NMR (400 MHz) and  $^{13}\text{C}$  NMR (101 MHz) spectra of 4-methyl-2-phenyl-4-(phenyldisulfanyl)oxazol-5(4*H*)-one (**3ah**) ( $\text{CDCl}_3$ )

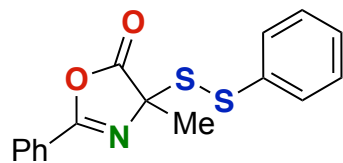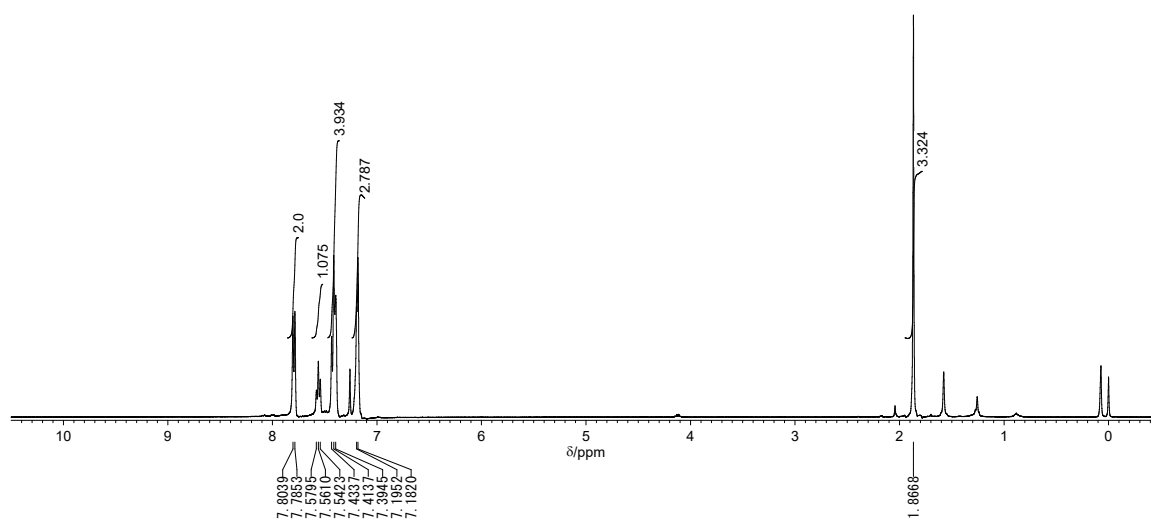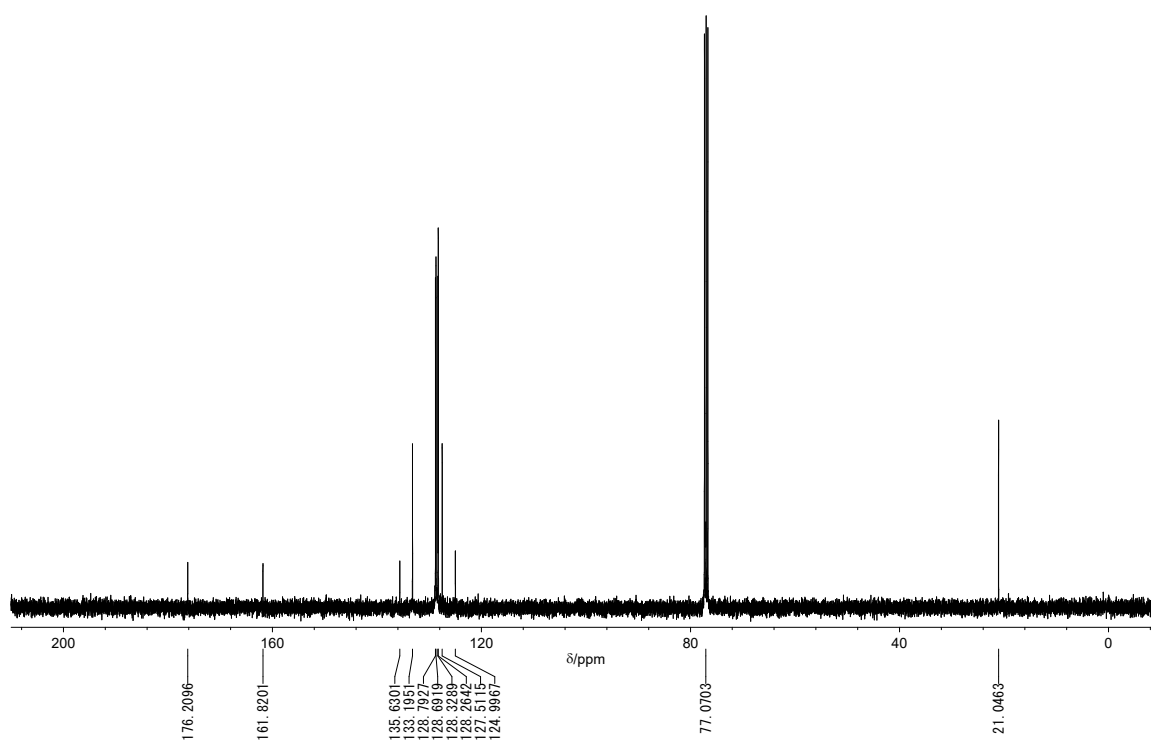

$^1\text{H}$  NMR (400 MHz) and  $^{13}\text{C}$  NMR (150 MHz) spectra of 4-methyl-2-phenyl-4-(*p*-tolylsulfanyl)oxazol-5(4*H*)-one (**3ai**) ( $\text{CDCl}_3$ )

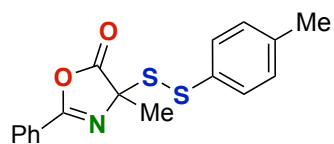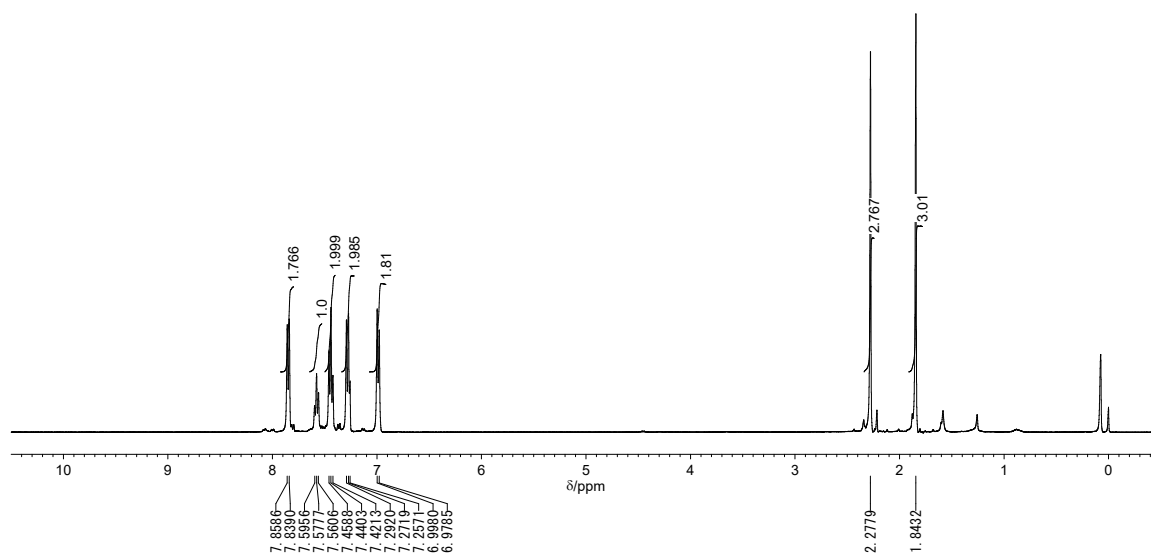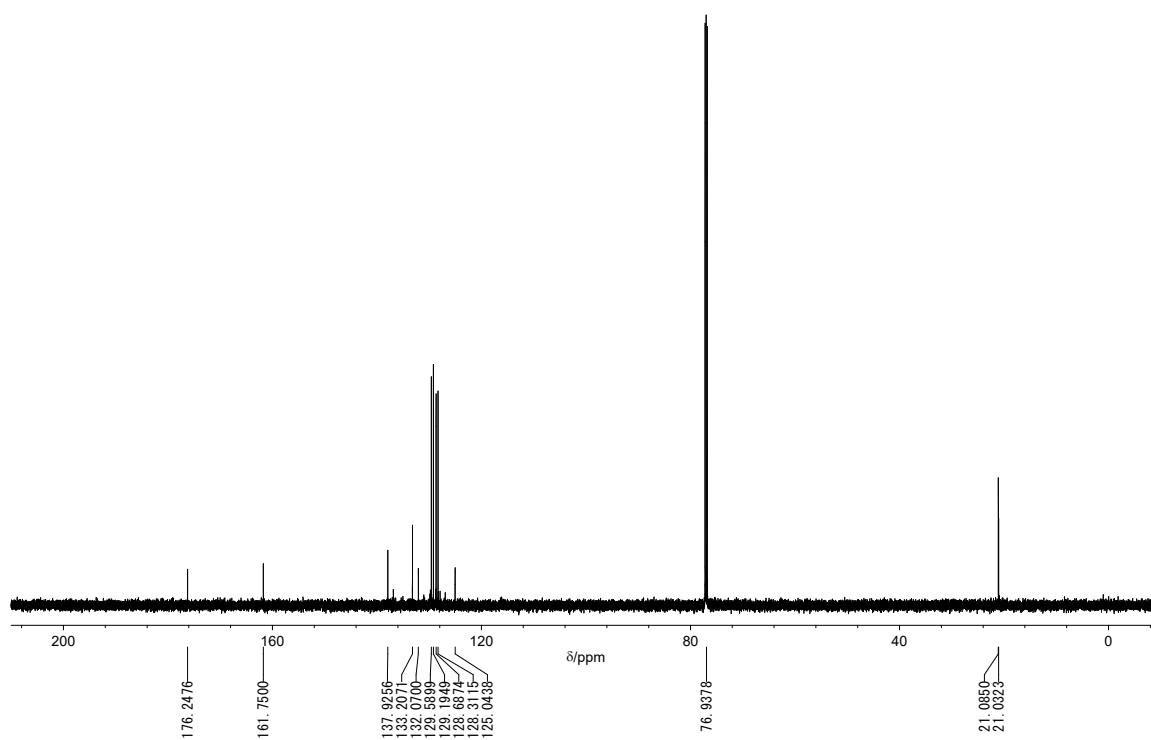

$^1\text{H}$  NMR (400 MHz) and  $^{13}\text{C}$  NMR (150 MHz) spectra of 4-((4-methoxyphenyl)disulfanyl)-4-methyl-2-phenyloxazol-5(4*H*)-one (**3aj**) ( $\text{CDCl}_3$ )

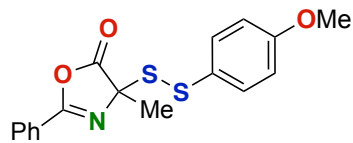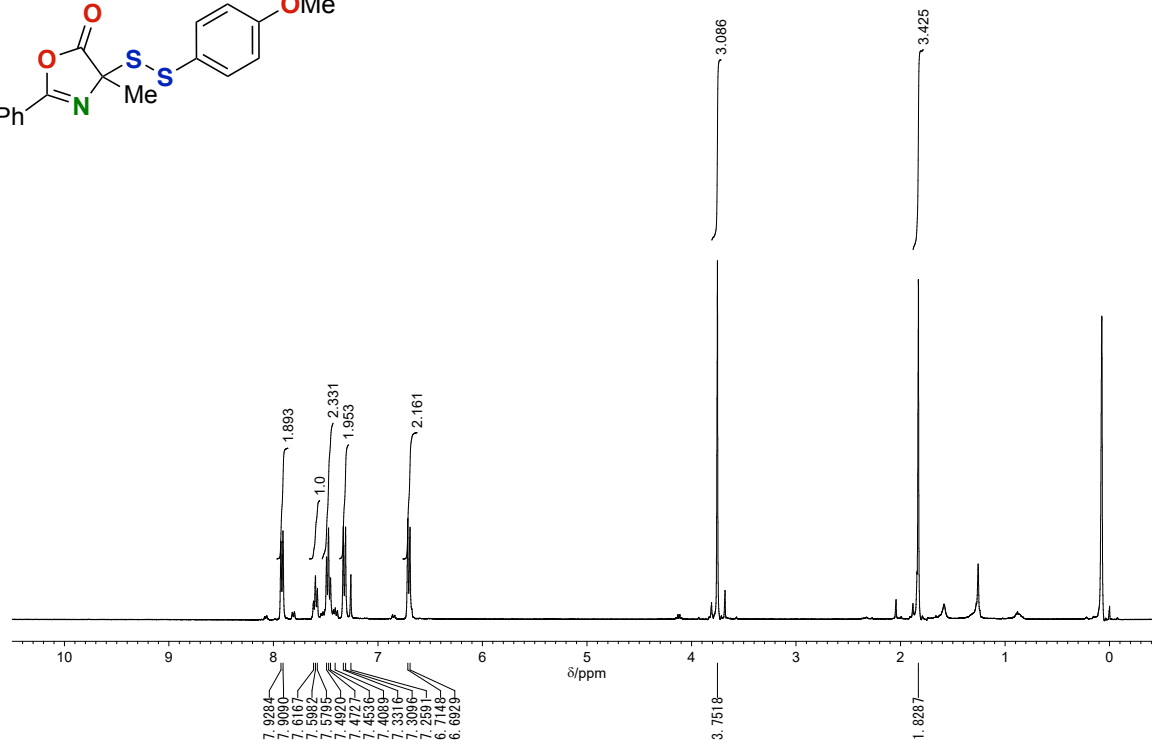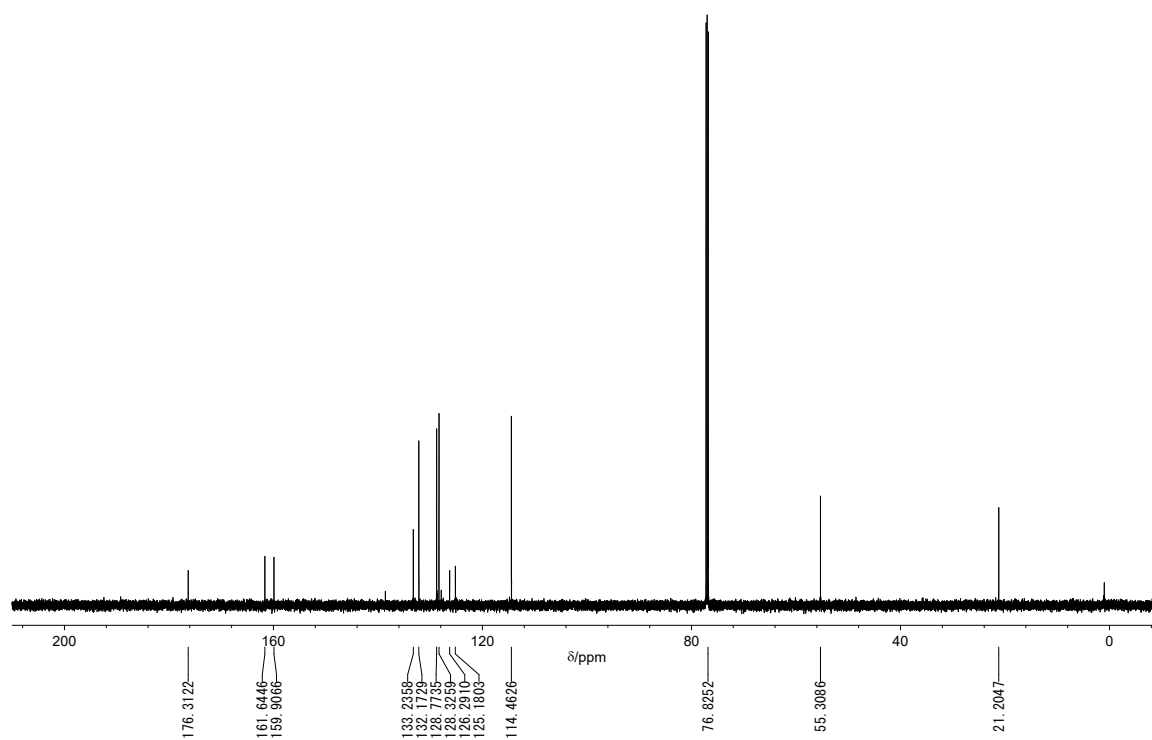

$^1\text{H}$  NMR (400 MHz) and  $^{13}\text{C}$  NMR (150 MHz) spectra of 4-methyl-4-(morpholinodisulfanyl)-2-phenyloxazol-5(4*H*)-one (**3ak**) ( $\text{CDCl}_3$ )

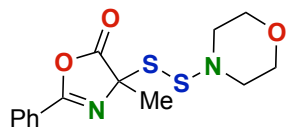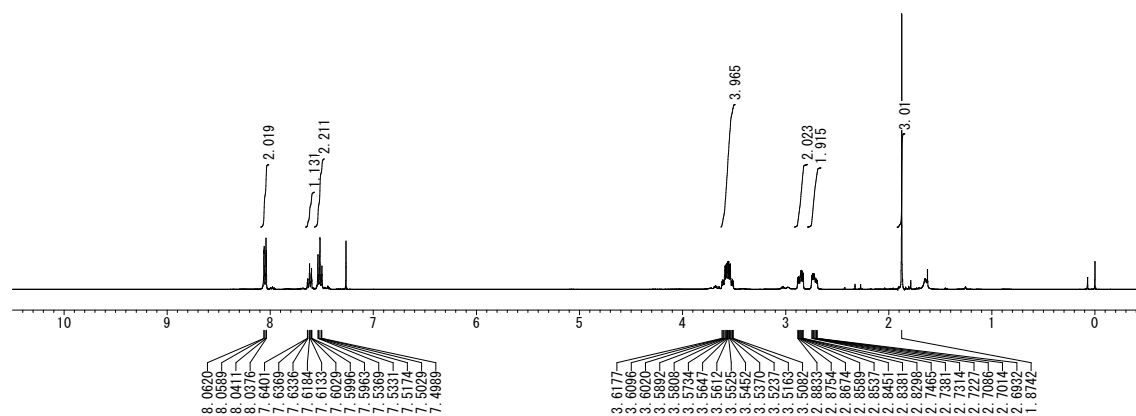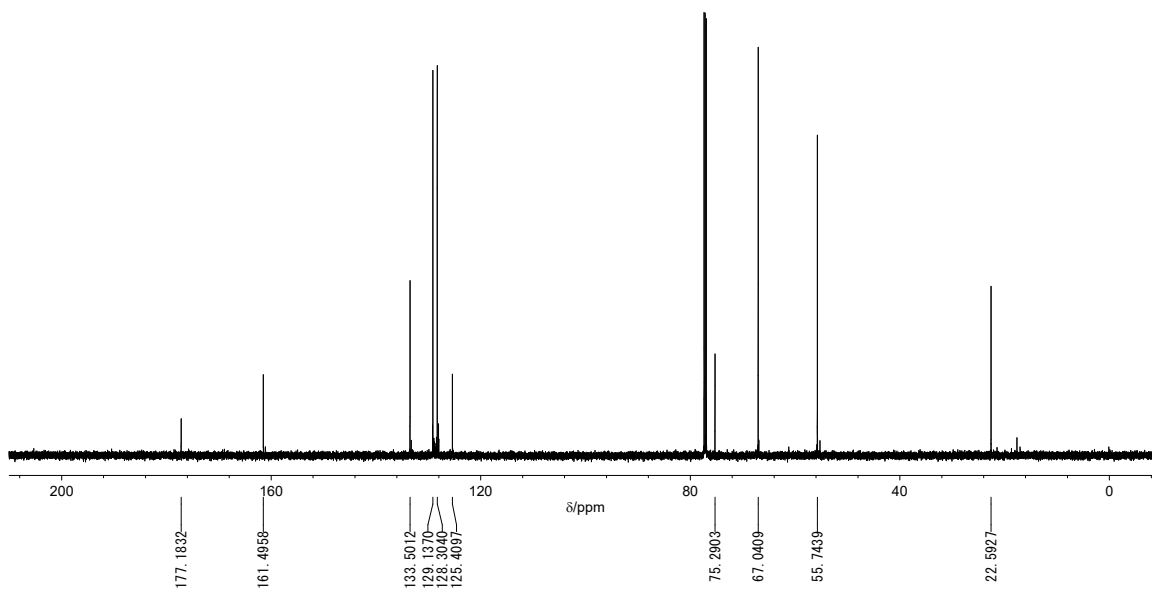

$^1\text{H}$  NMR (400 MHz) and  $^{13}\text{C}$  NMR (150 MHz) spectra of methyl *N*-(*N*-(*tert*-butoxycarbonyl)-*O*-(*tert*-butyldimethylsilyl)-*L*-seryl)-*S*-((4-methyl-5-oxo-2-phenyl-4,5-dihydrooxazol-4-yl)thio)-*L*-cysteinate (**3a**) ( $\text{CDCl}_3$ )

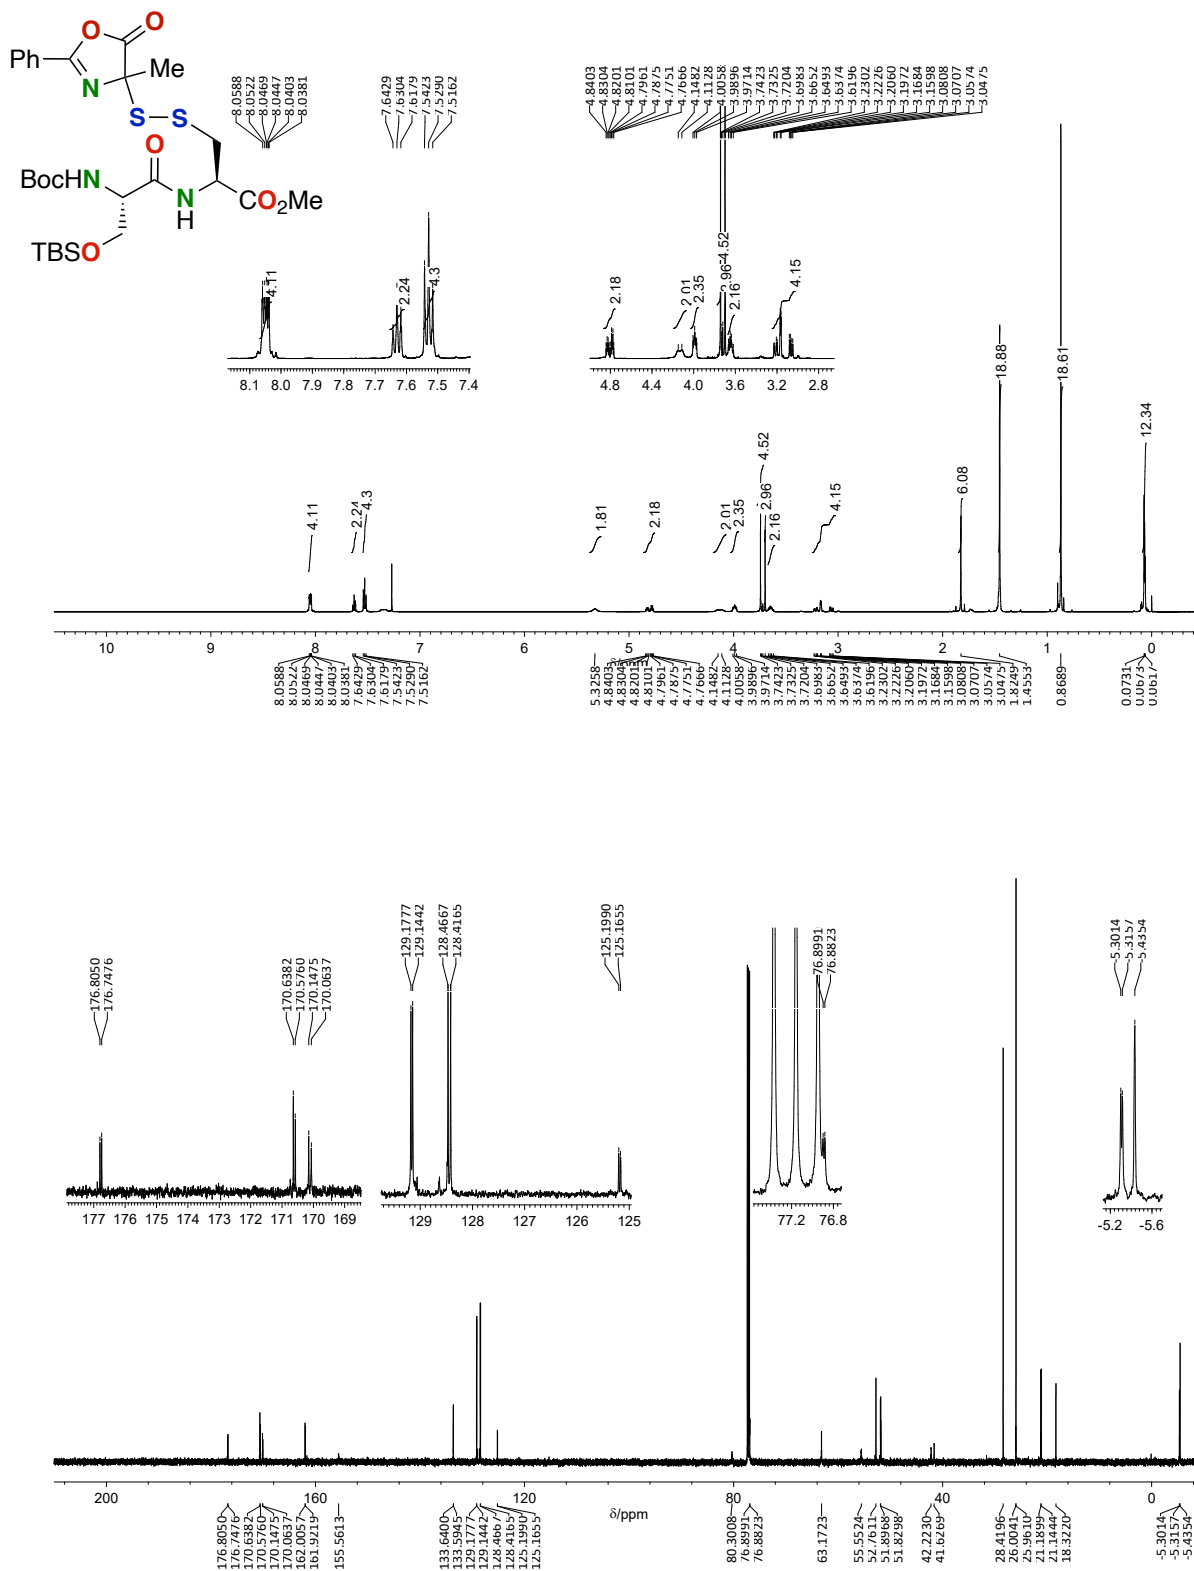

$^1\text{H}$  NMR (400 MHz) and  $^{13}\text{C}$  NMR (101 MHz) spectra of 4-methyl-4-((2-((8*R*,9*S*,13*S*,14*S*)-13-methyl-17-oxo-7,8,9,11,12,13,14,15,16,17-decahydro-6*H*-cyclopenta[*a*]phenanthren-3-yl)allyl)disulfanyl)-2-phenyloxazol-5(4*H*)-one (**3am**) ( $\text{CDCl}_3$ )

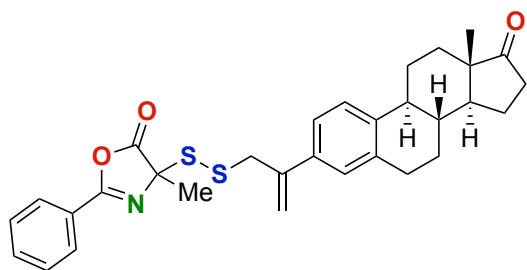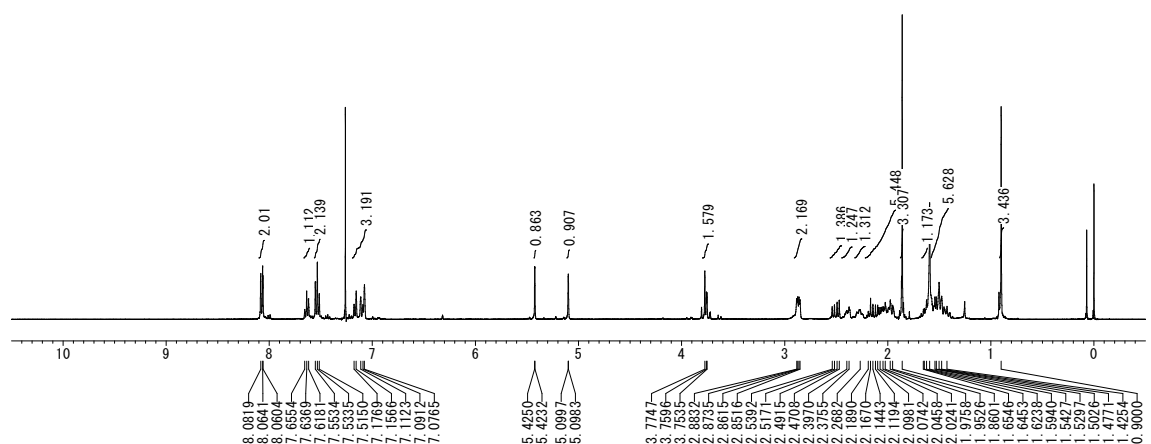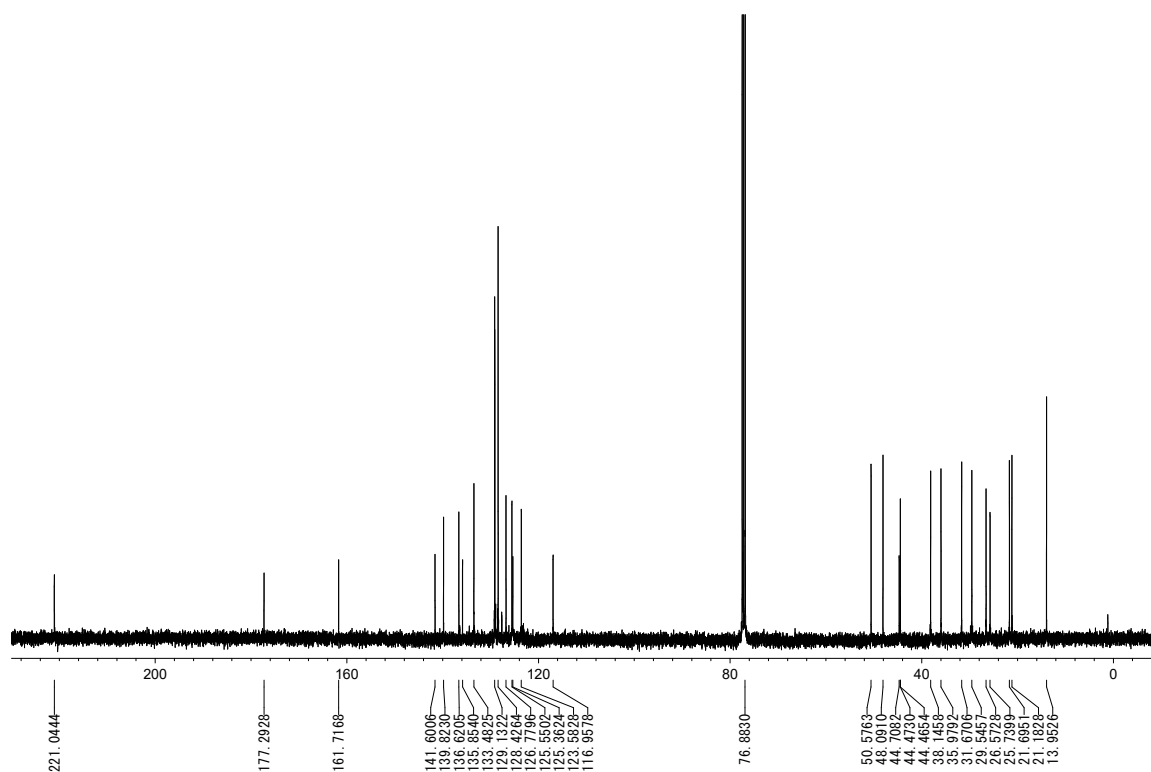



$^1\text{H}$  NMR (400 MHz) and  $^{13}\text{C}$  NMR (150 MHz) spectra of 2-((trimethylsilyl)methyl)allyl 9H-fluorene-1-carboxylate (**4**) ( $\text{CDCl}_3$ )

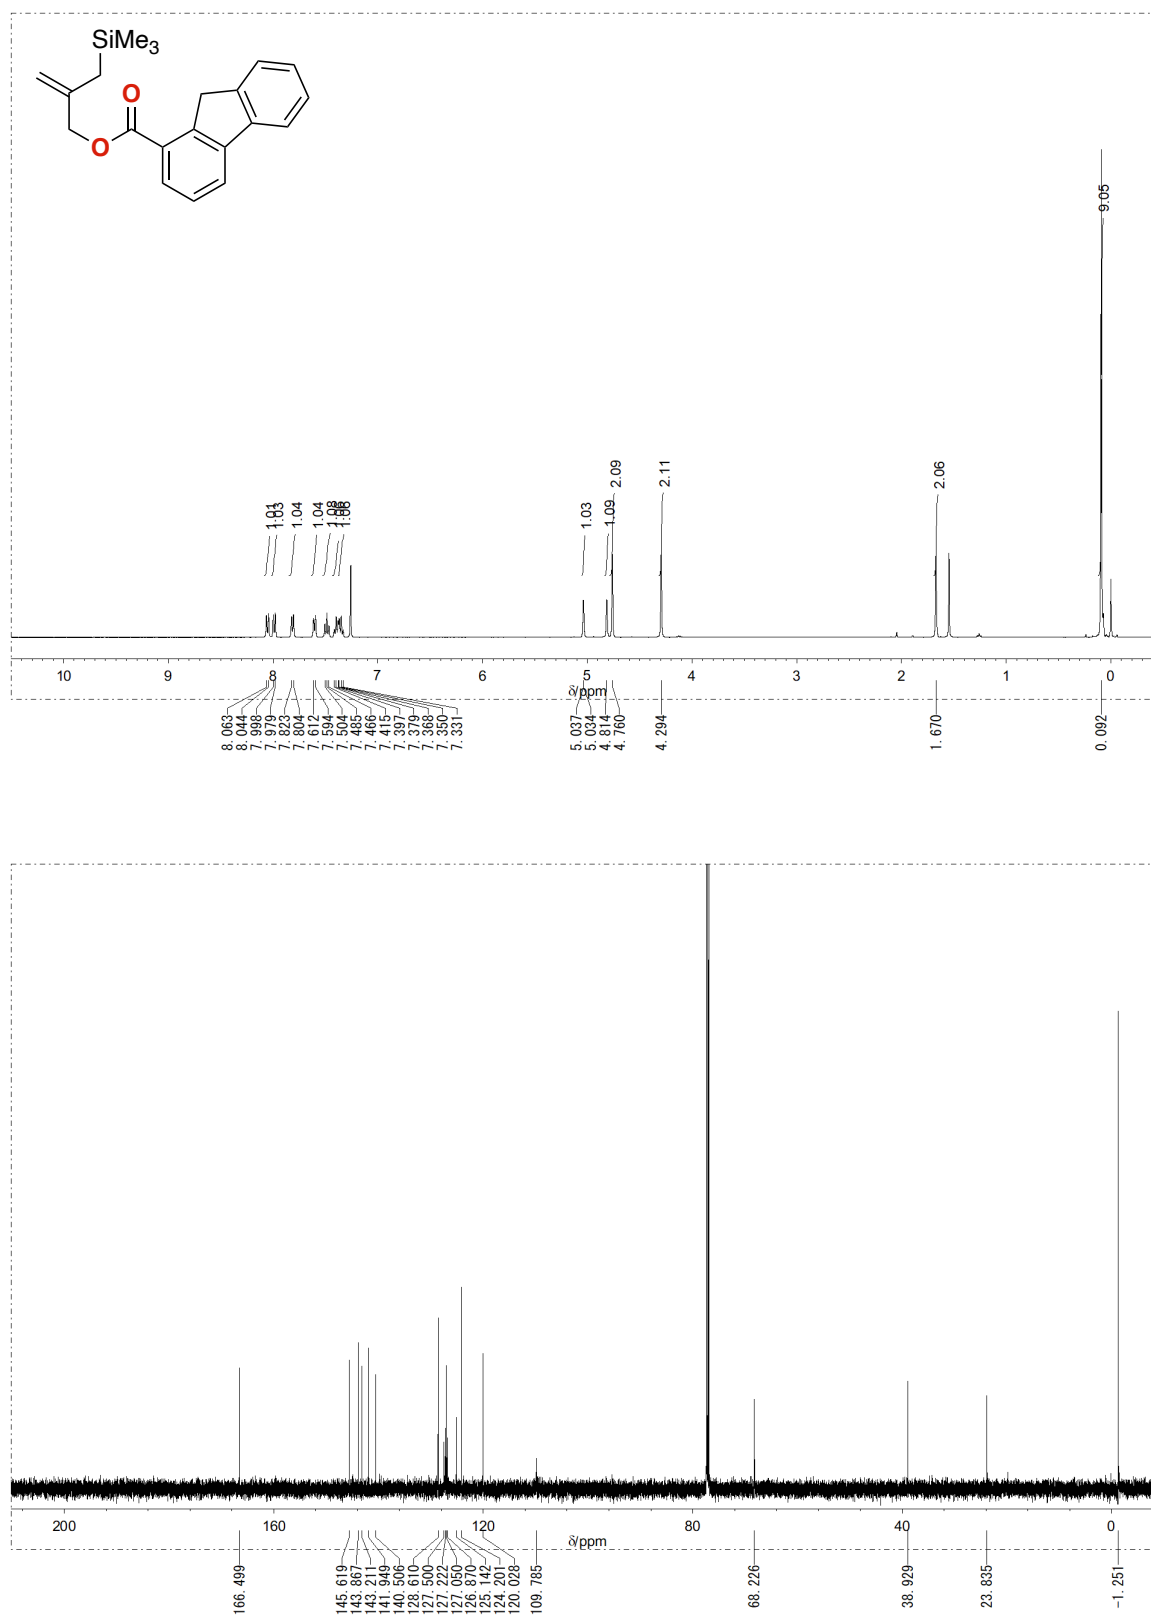

$^1\text{H}$  NMR (600 MHz) and  $^{13}\text{C}$  NMR (101 MHz) spectra of 2-(((1,3-dioxoisindolin-2-yl)disulfanyl)methyl)allyl 9*H*-fluorene-1-carboxylate (**5**) ( $\text{CDCl}_3$ )

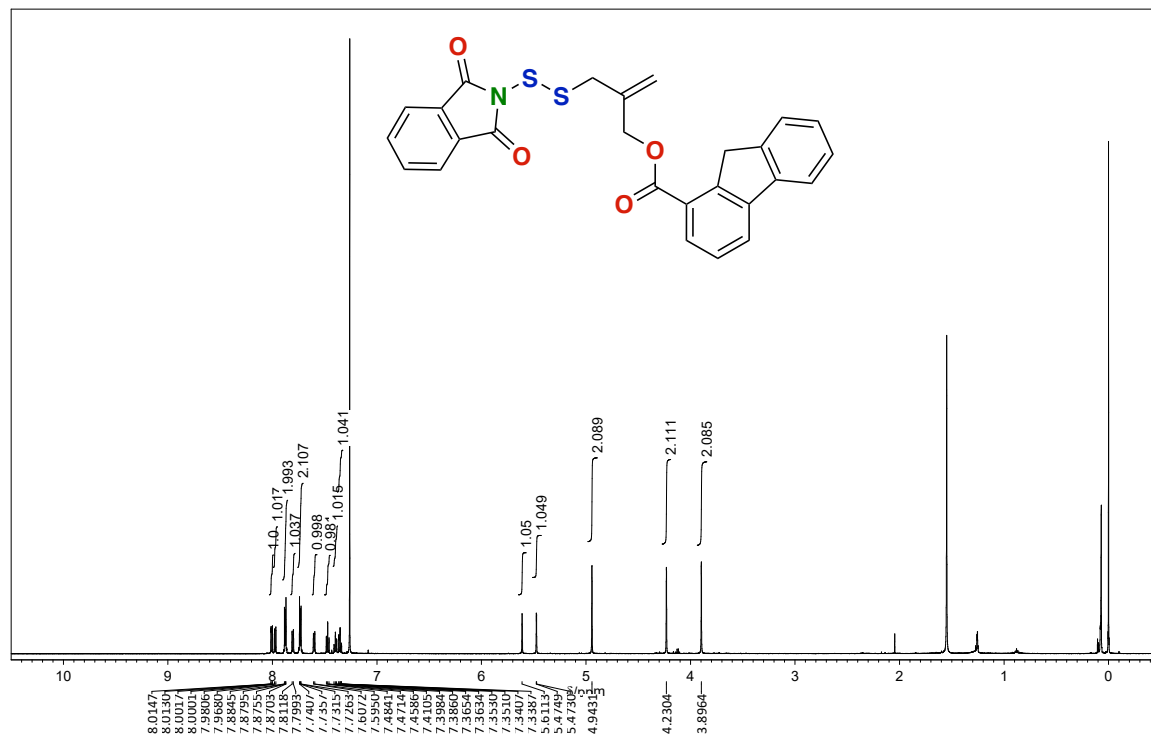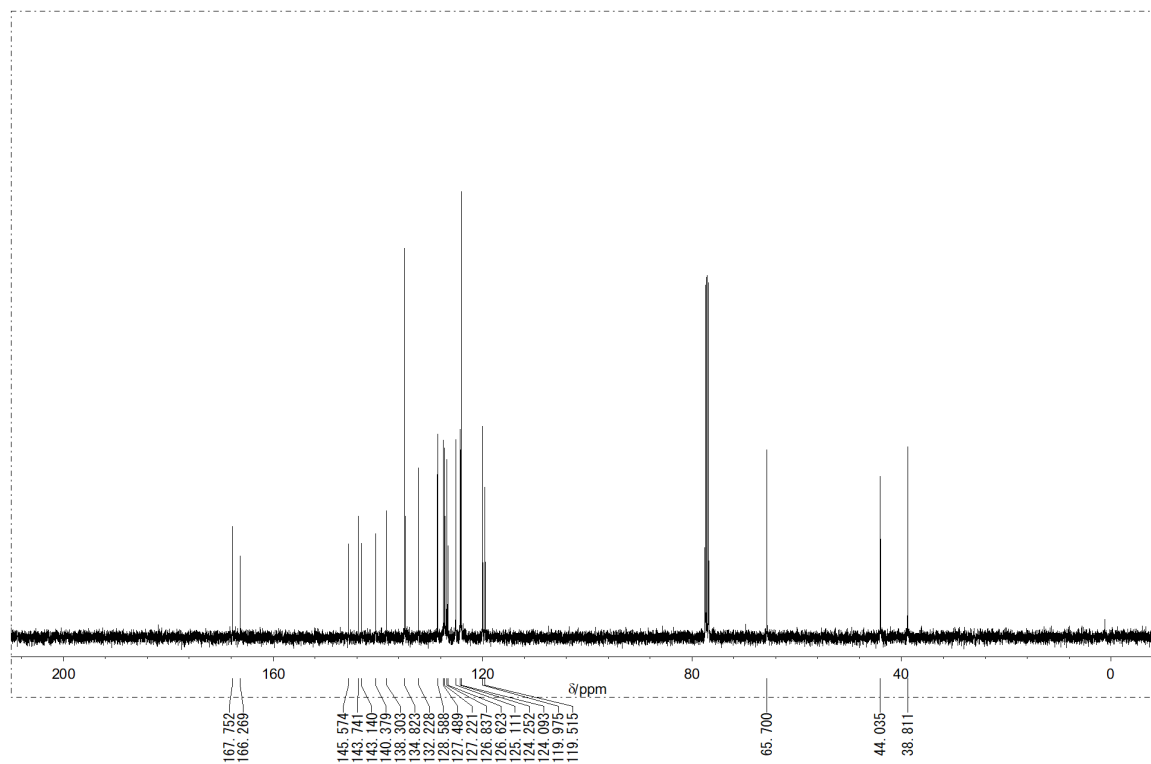

<sup>1</sup>H NMR (400 MHz) and <sup>13</sup>C NMR (150 MHz) spectra of 2-(((4-benzyl-5-oxo-2-phenyl-4,5-dihydrooxazol-4-yl)disulfanyl)methyl)allyl 9*H*-fluorene-1-carboxylate (**6**) (CDCl<sub>3</sub>)

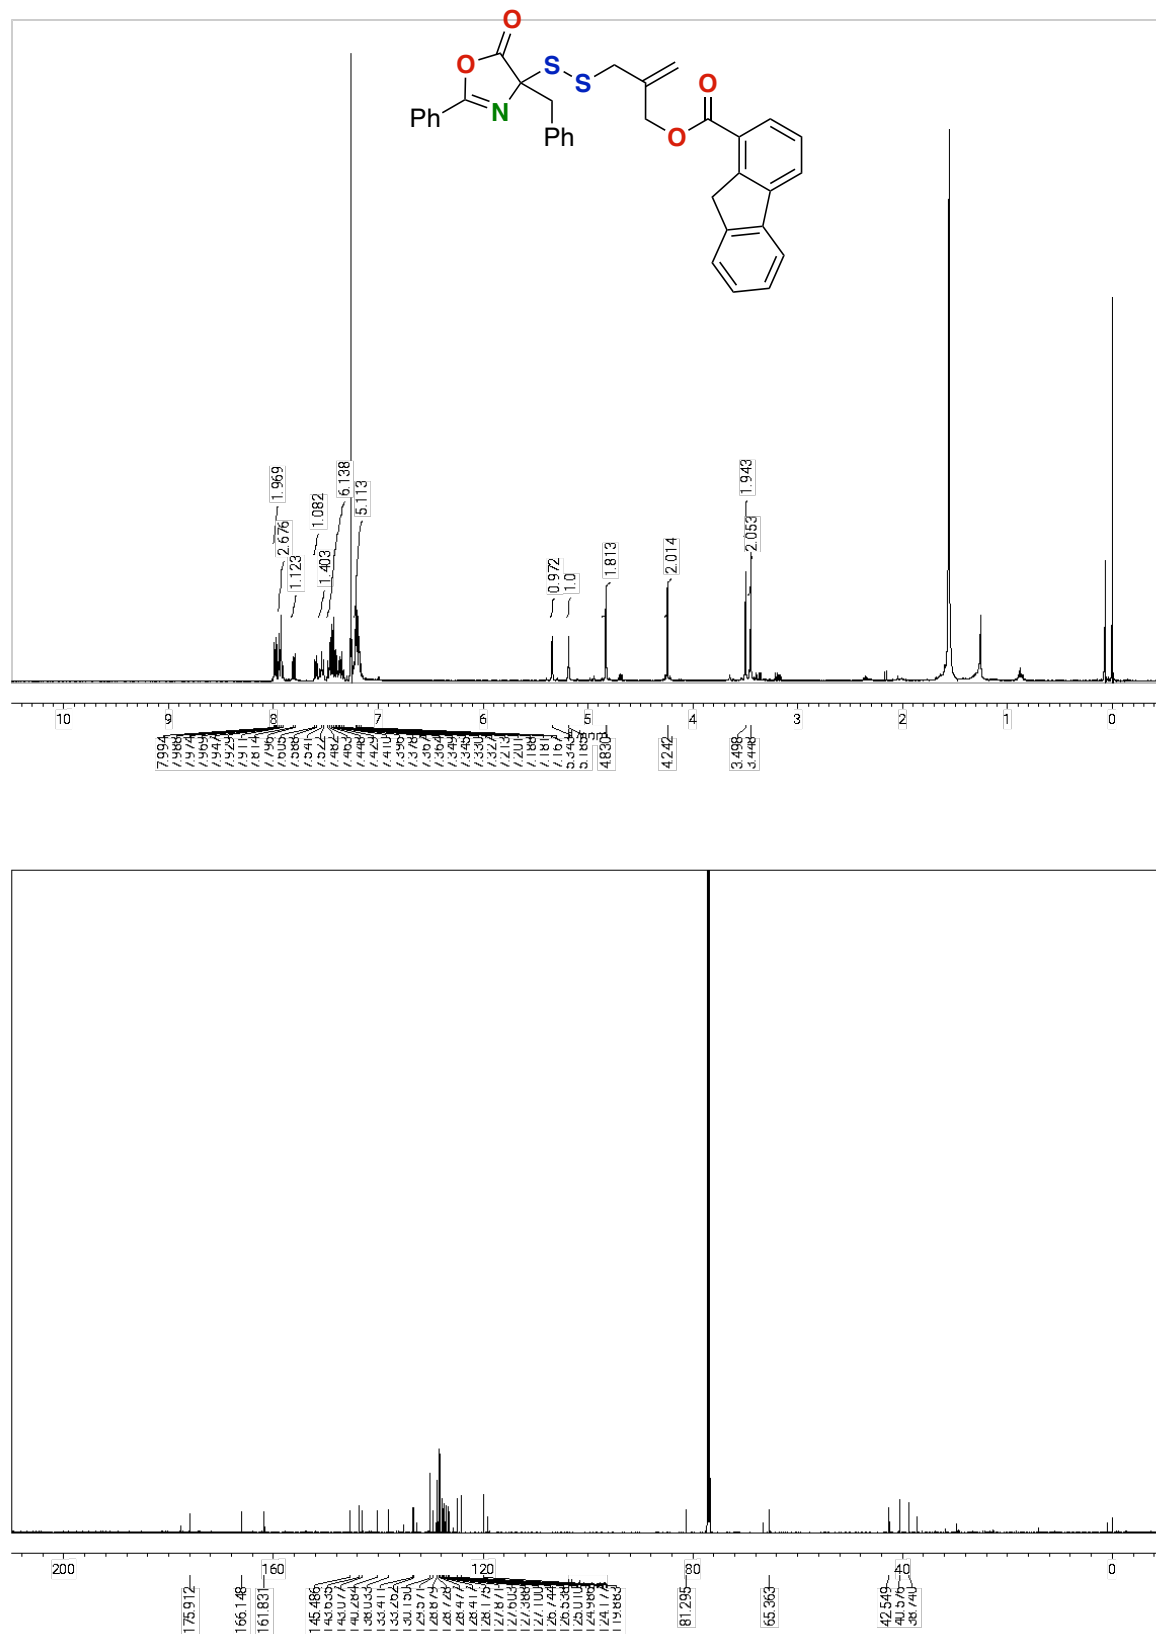

<sup>1</sup>H NMR (400 MHz) and <sup>13</sup>C NMR (150 MHz) spectra of (2*S*,3*S*,4*R*,5*S*,6*R*)-2-(acetoxymethyl)-6-((4-isopropyl-5-oxo-2-phenyl-4,5-dihydrooxazol-4-yl)disulfanyl)tetrahydro-2*H*-pyran-3,4,5-triyl triacetate (**10**) (CDCl<sub>3</sub>)

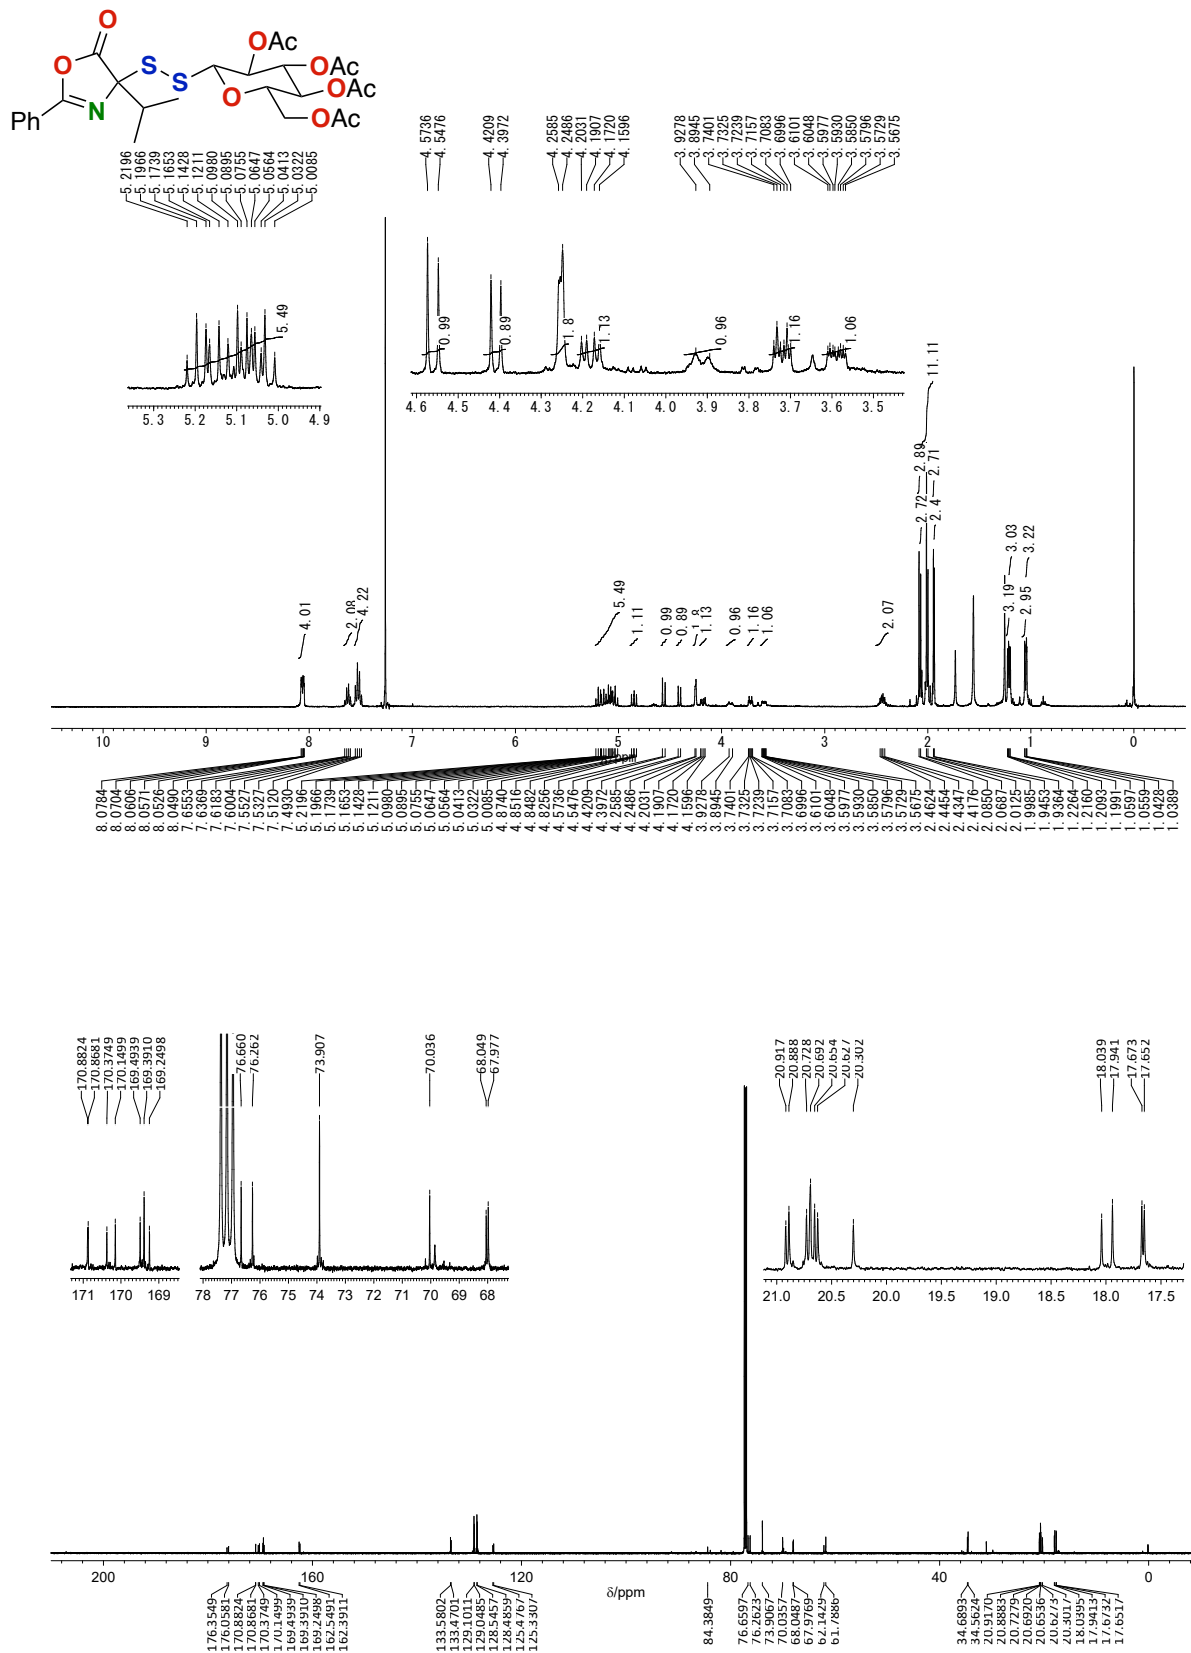

$^1\text{H}$  NMR (400 MHz) and  $^{13}\text{C}$  NMR (150 MHz) spectra of 4-(((3-(9,10-ethanoanthracen-9(10*H*)-yl)propyl)(methyl)amino)disulfanyl)-4-(2-(methylthio)ethyl)-2-phenyloxazol-5(4*H*)-one (**14**) ( $\text{CDCl}_3$ )

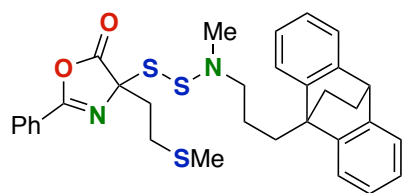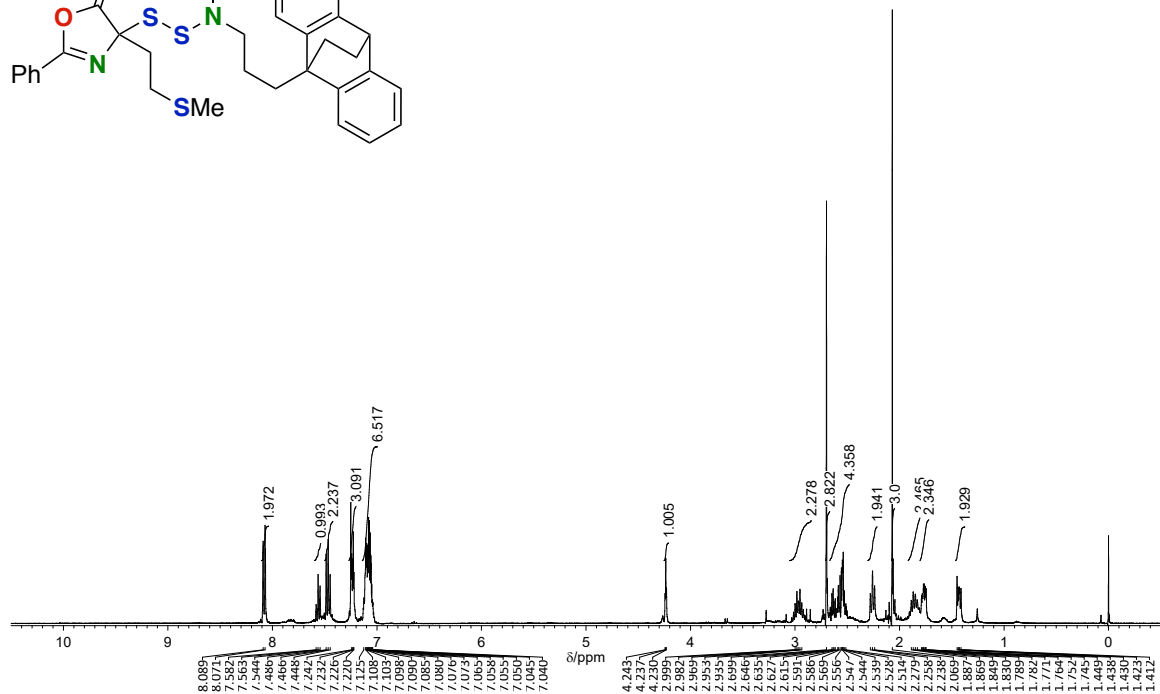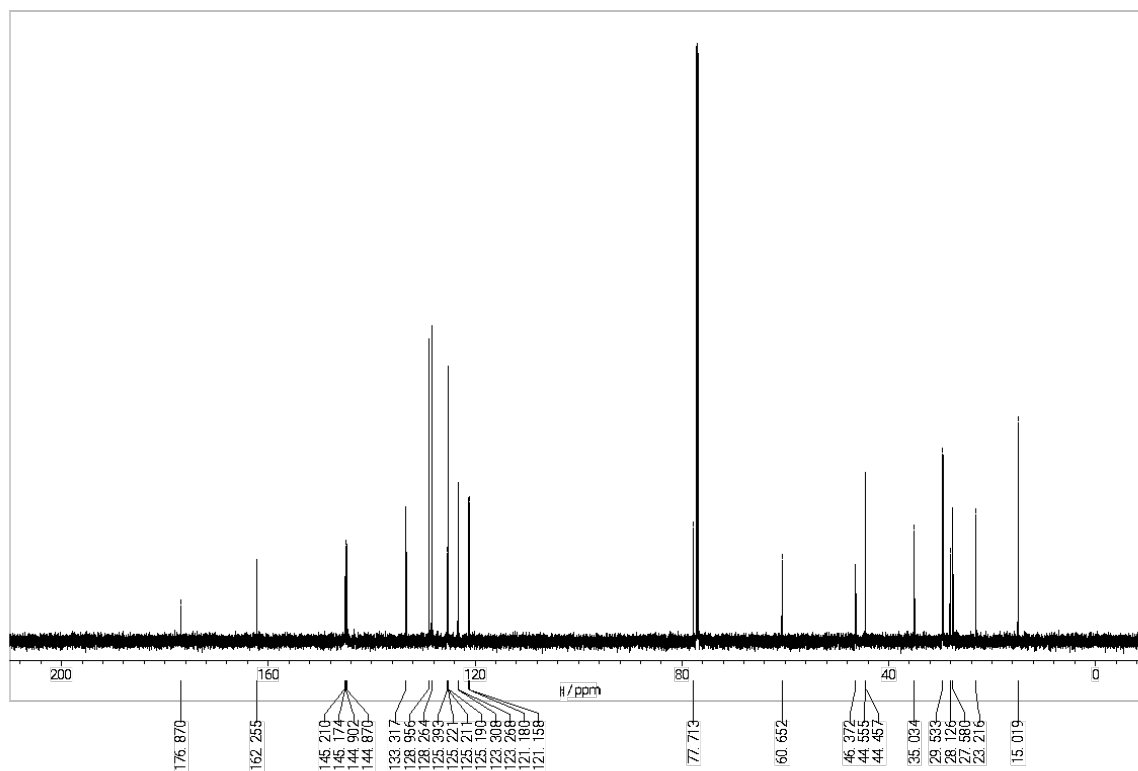

$^1\text{H}$  NMR (400 MHz) and  $^{13}\text{C}$  NMR (150 MHz) spectra of 2-(allyldisulfanyl)-2-benzamidopropanoic acid (**15a**) ( $\text{CD}_3\text{OD}$ )

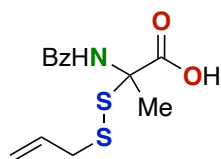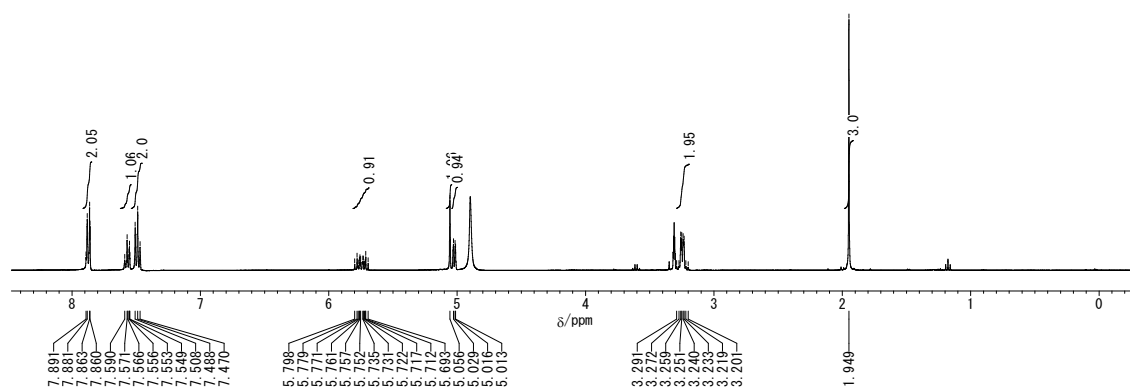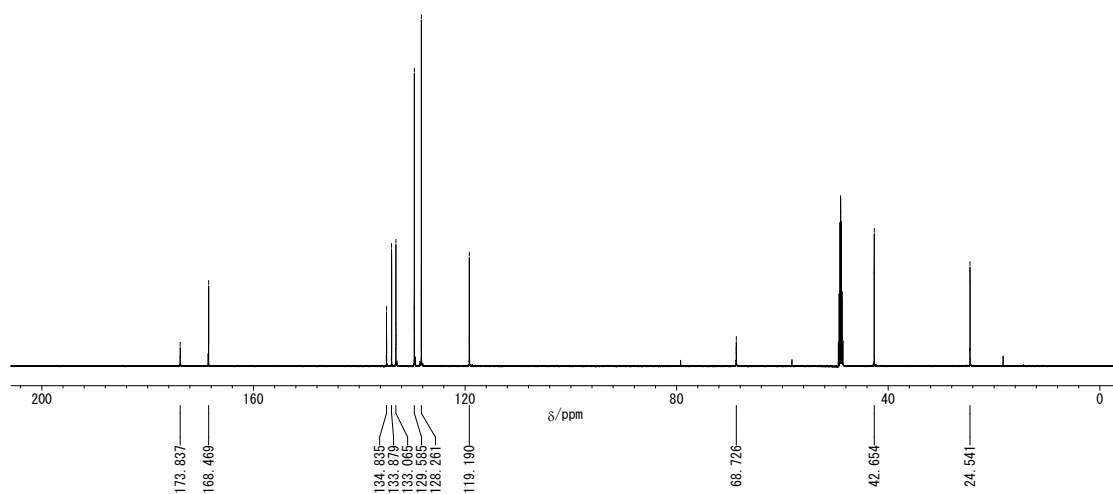

$^1\text{H}$  NMR (400 MHz) and  $^{13}\text{C}$  NMR (150 MHz) spectra of methyl 2-(allyldisulfanyl)-2-benzamidopropanoate (**15b**) ( $\text{CDCl}_3$ )

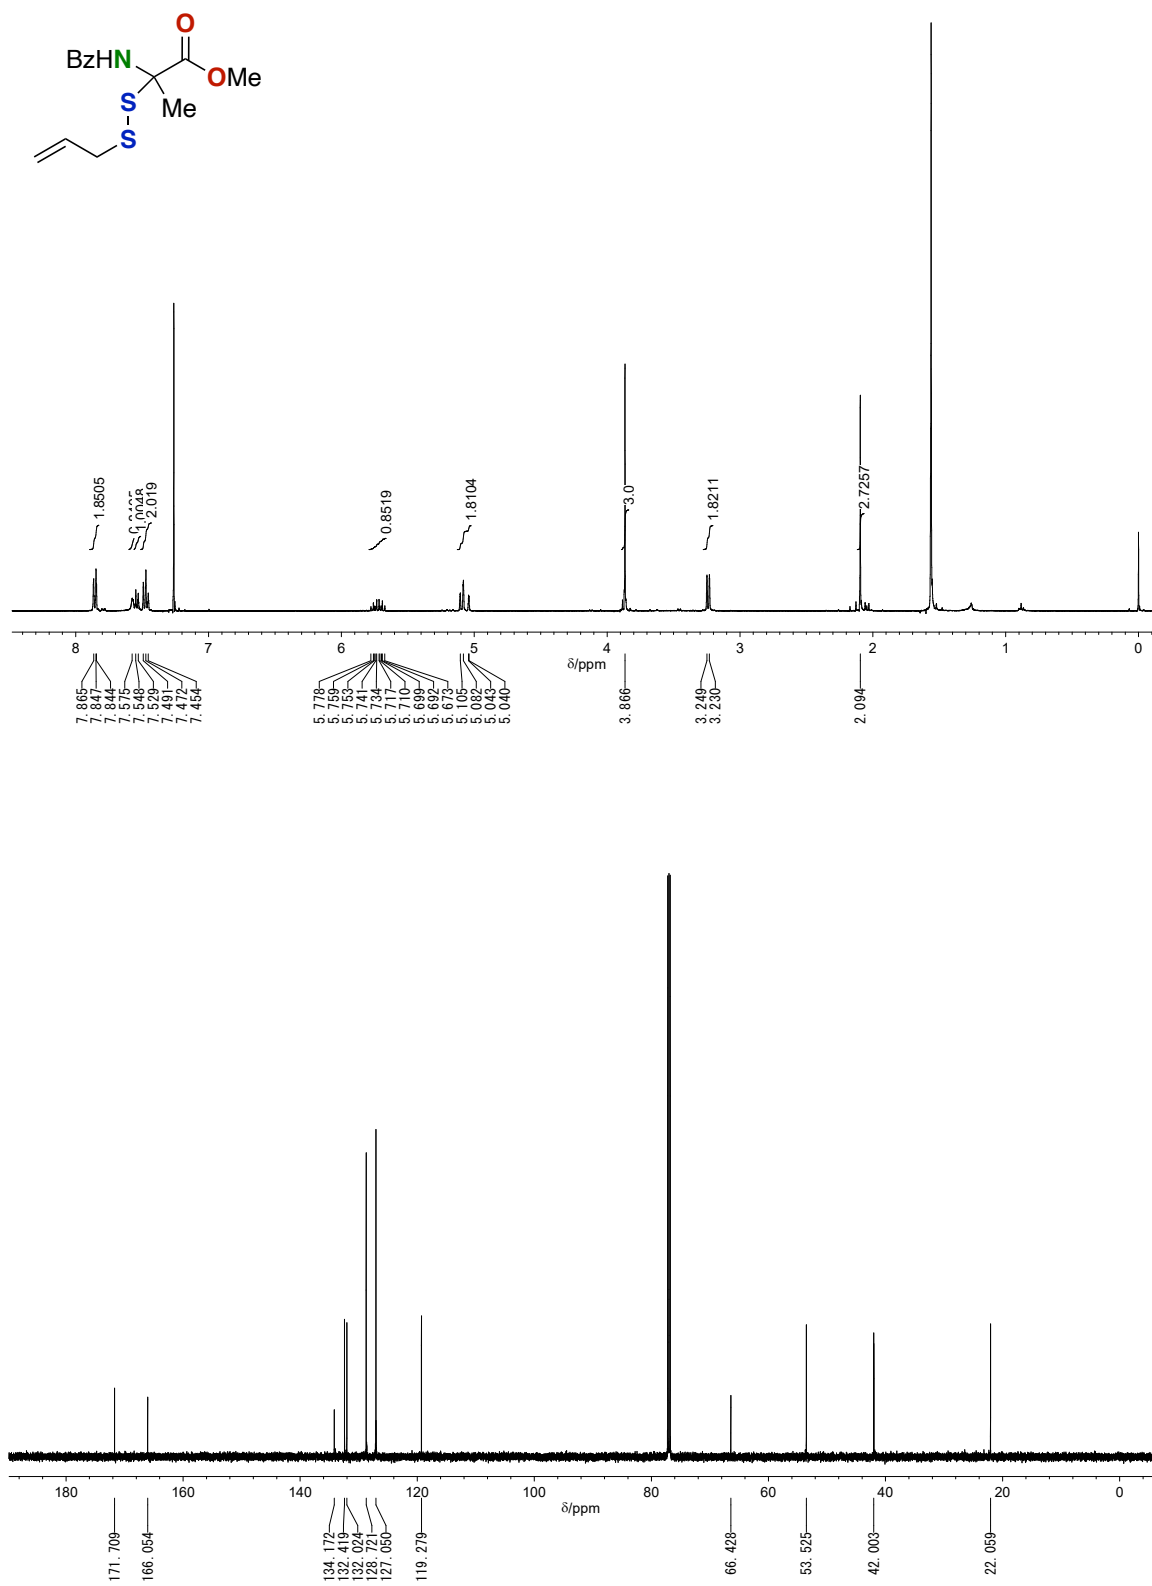

$^1\text{H}$  NMR (400 MHz) and  $^{13}\text{C}$  NMR (150 MHz) spectra of ((3*aR*,5*R*,5*aS*,8*aS*,8*bR*)-2,2,7,7-tetramethyltetrahydro-5*H*-bis([1,3]dioxolo)[4,5-*b*:4':5'-*d*]pyran-5-yl)methyl 2-(allyldisulfanyl)-2-benzamidopropanoate (**15c**) ( $\text{CDCl}_3$ )

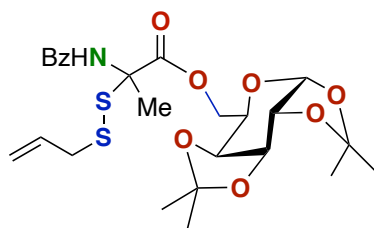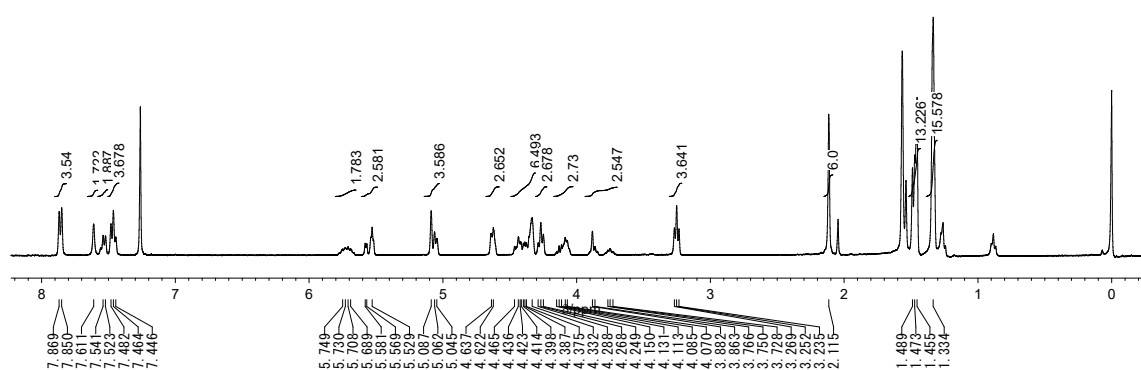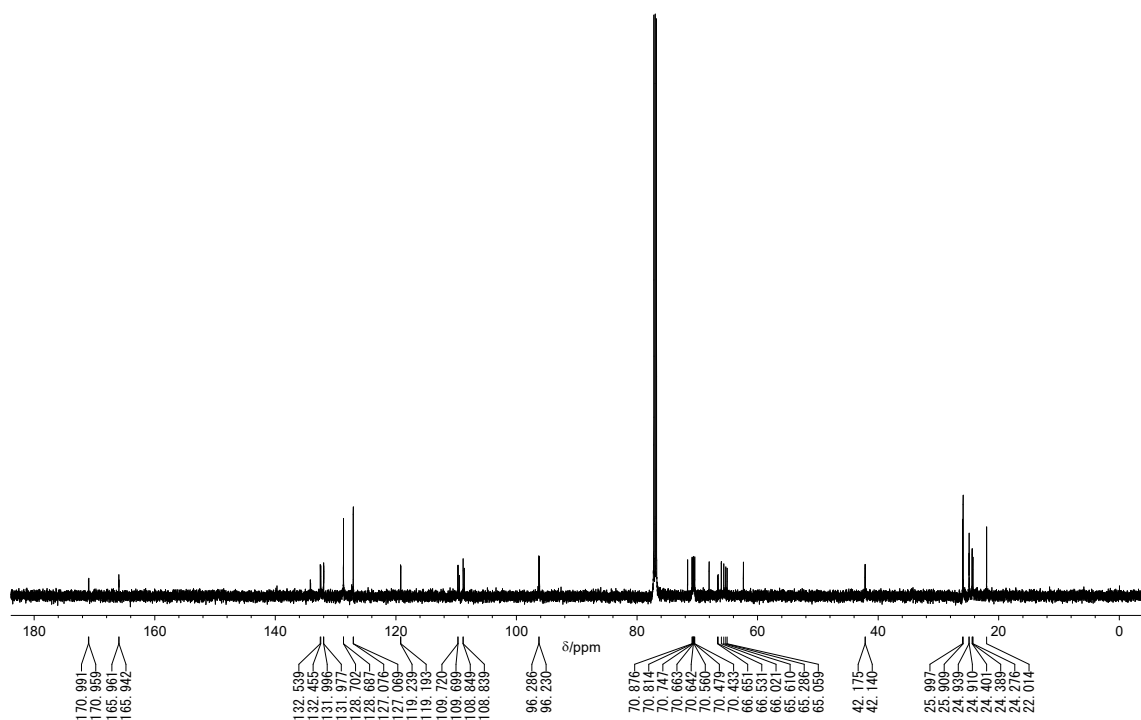



$^1\text{H}$  NMR (400 MHz) and  $^{13}\text{C}$  NMR (150 MHz) spectra of *N*-(2-(allyldisulfanyl)-1-(((1*R*,4*aS*,10*aR*)-7-isopropyl-1,4*a*-dimethyl-1,2,3,4,4*a*,9,10,10*a*-octahydrophenanthren-1-yl)methyl)amino)-1-oxopropan-2-yl)benzamide (**15d**) ( $\text{CDCl}_3$ )

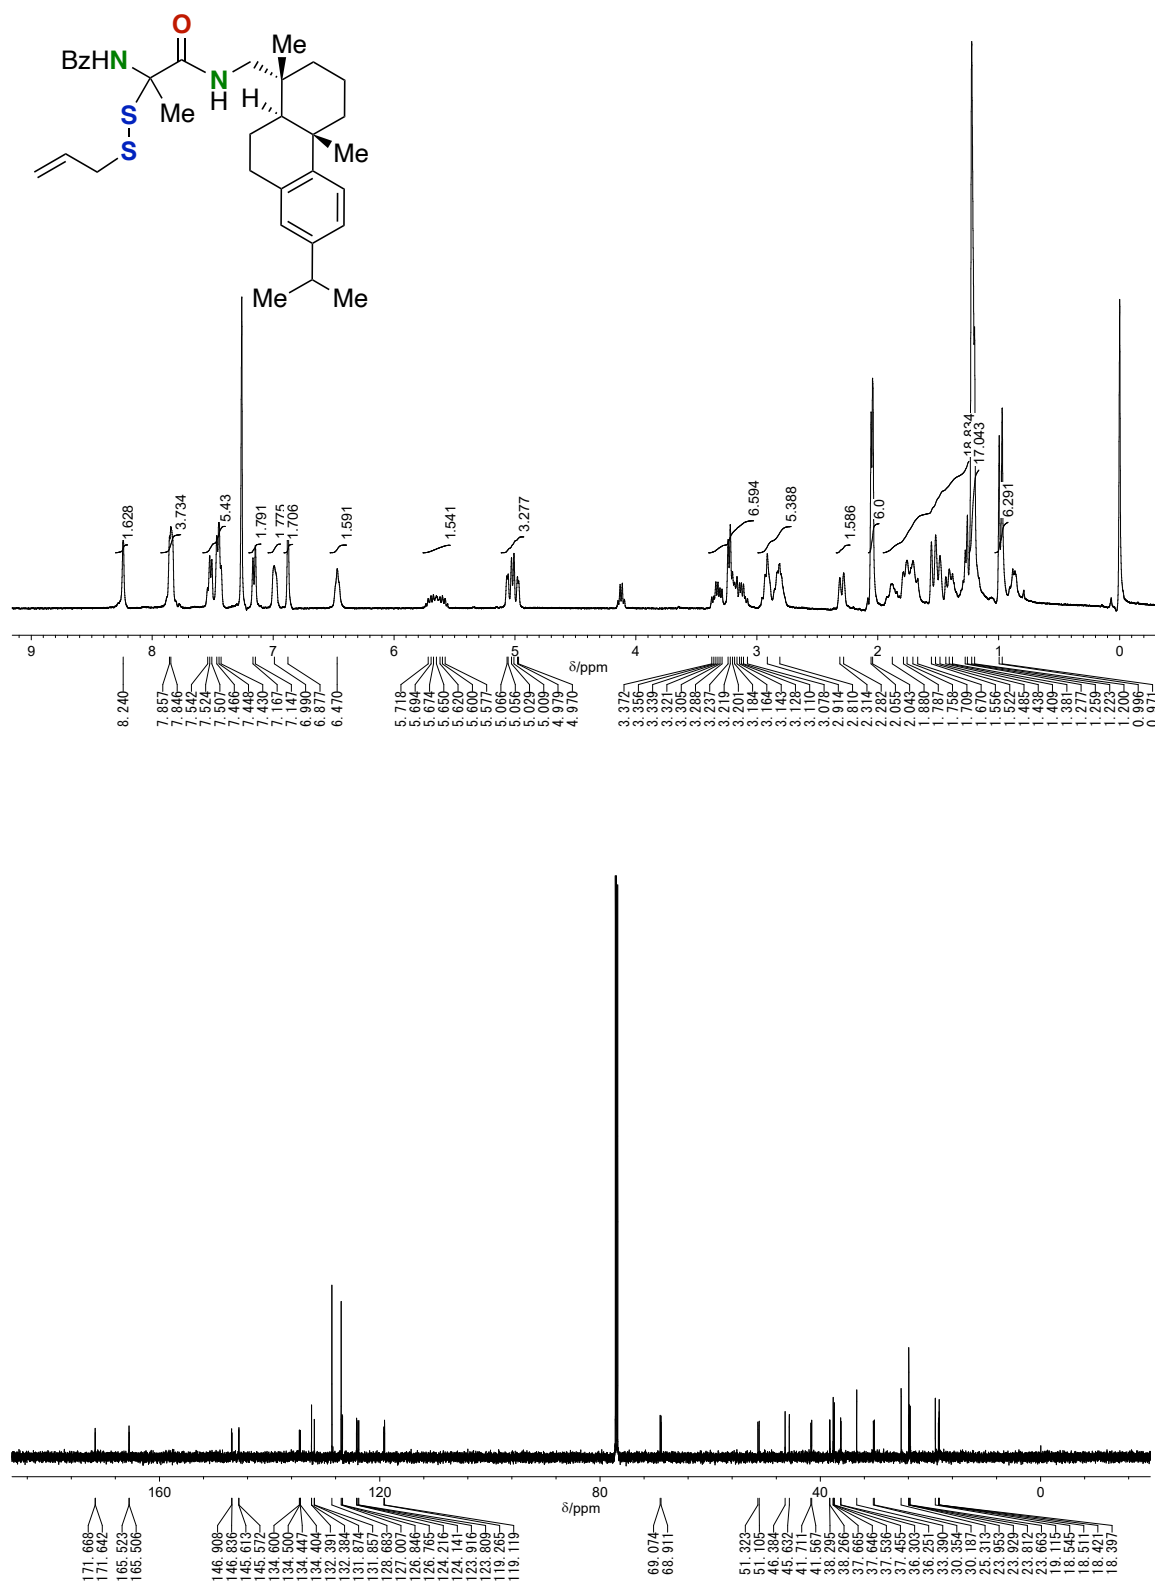

$^1\text{H}$  NMR (400 MHz) and  $^{13}\text{C}$  NMR (150 MHz) spectra of *N*-(2-(allyldisulfanyl)-1-(butylamino)-4-(methylthio)-1-oxobutan-2-yl)benzamide (**15e**) ( $\text{CDCl}_3$ )

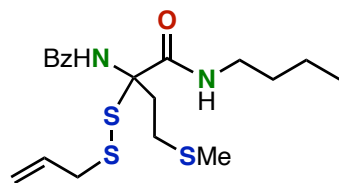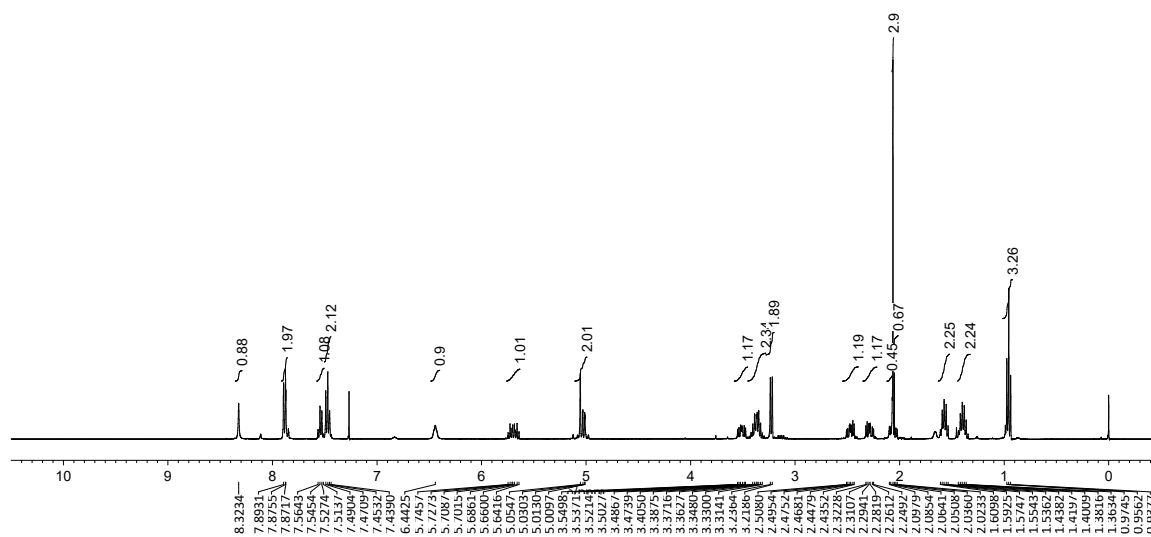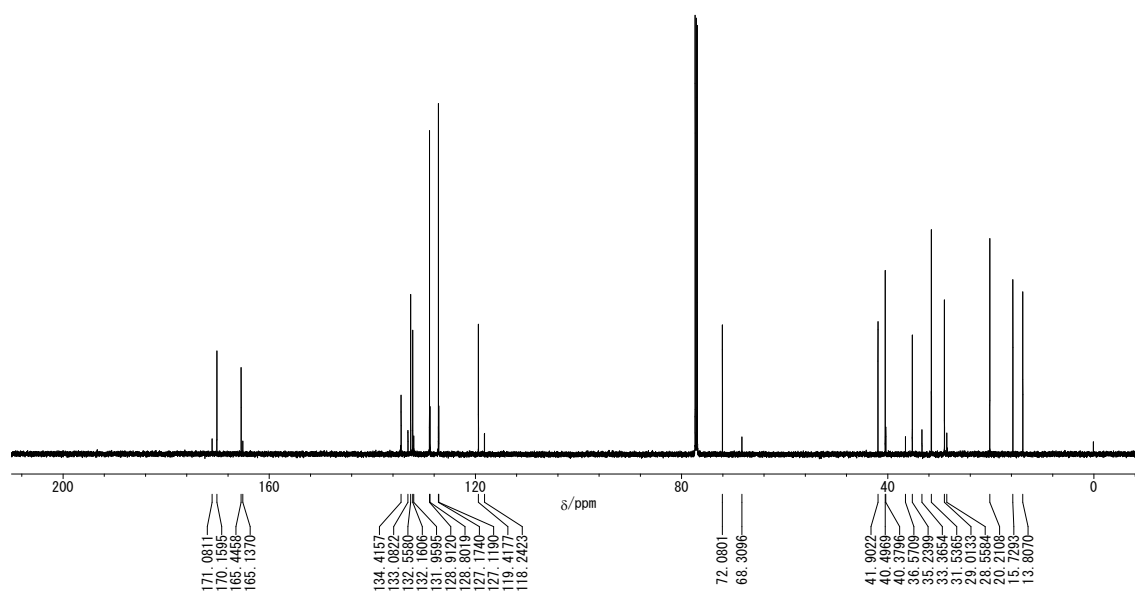

$^1\text{H}$  NMR (400 MHz) and  $^{13}\text{C}$  NMR (150 MHz) spectra of (5*R*,5*aR*,8*aR*,9*R*)-8-oxo-9-(3,4,5-trimethoxyphenyl)-5,5*a*,6,8,8*a*,9-hexahydrofuro[3',4':6,7]naphtho[2,3-*d*][1,3]dioxol-5-yl 2-(2-((1,3-dioxoisindolin-2-yl)disulfanyl)phenyl)acetate ( $\text{CDCl}_3$ )

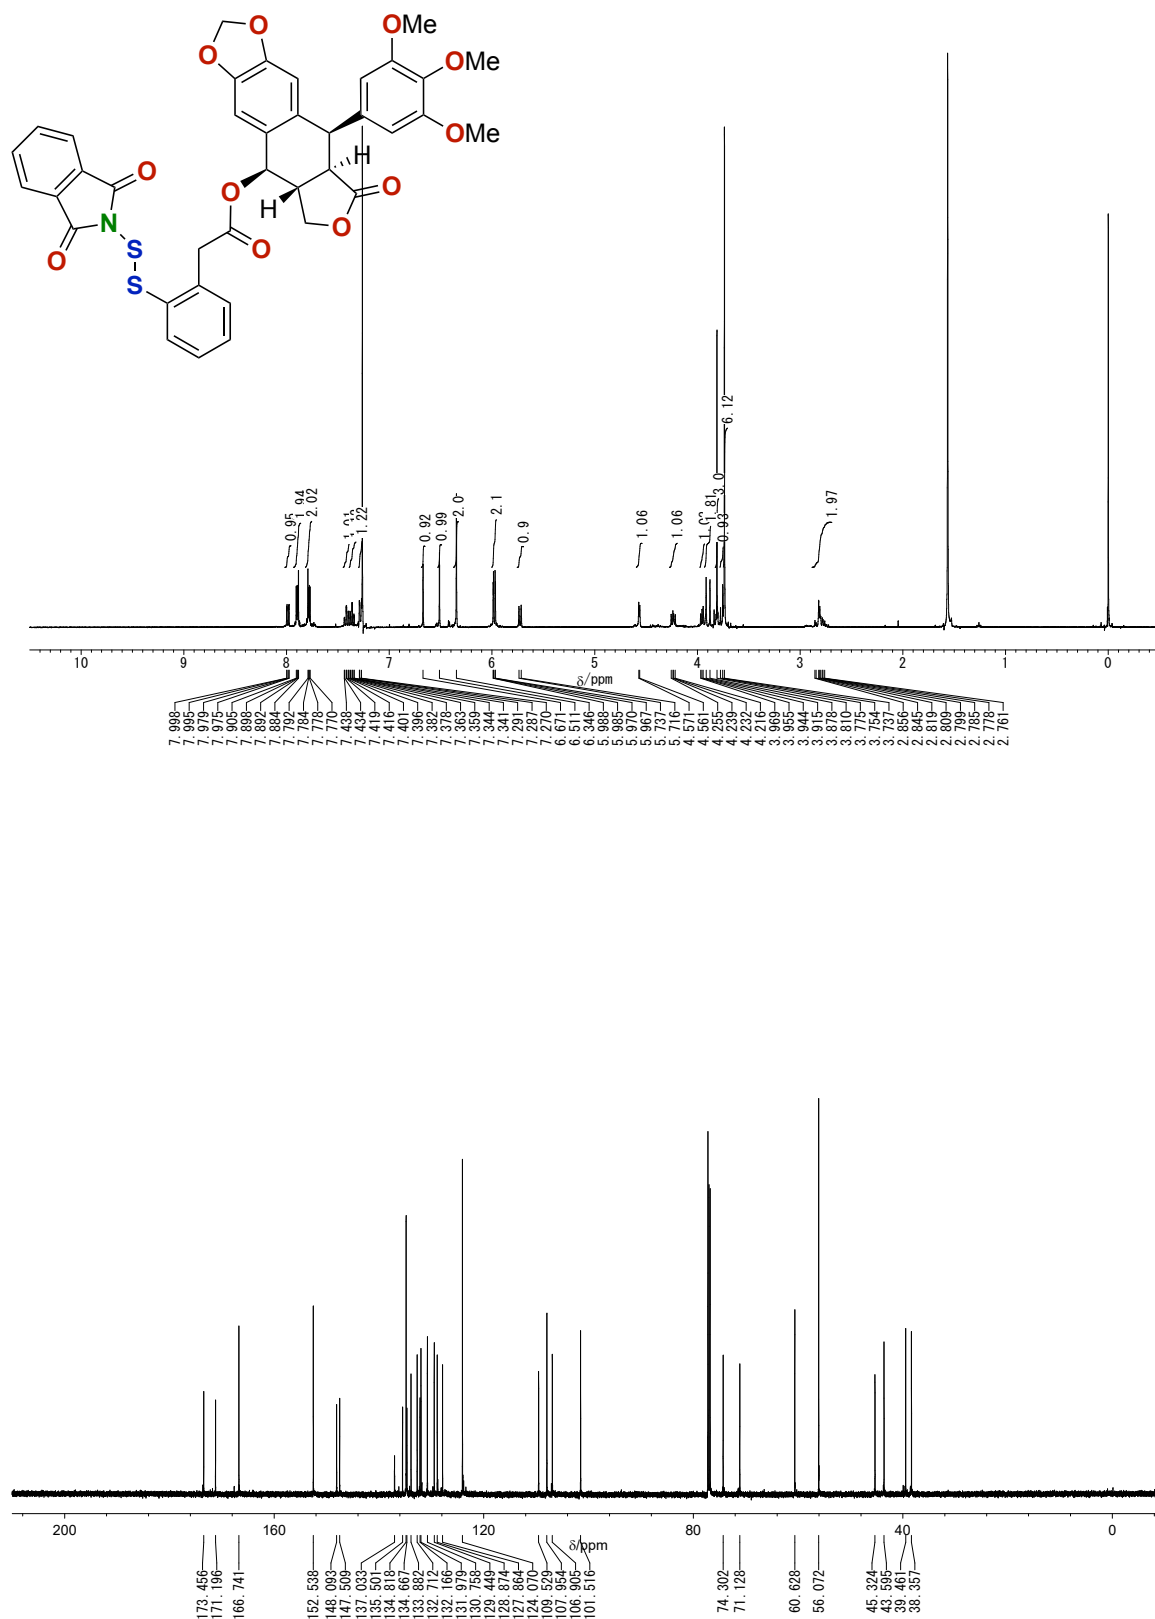

$^1\text{H}$  NMR (400 MHz) and  $^{13}\text{C}$  NMR (150 MHz) spectra of (5*R*,5*aR*,8*aR*,9*R*)-8-oxo-9-(3,4,5-trimethoxyphenyl)-5,5*a*,6,8,8*a*,9-hexahydrofuro[3',4':6,7]naphtho[2,3-*d*][1,3]dioxol-5-yl 2-(2-((4-methyl-5-oxo-2-phenyl-4,5-dihydrooxazol-4-yl)disulfanyl)phenyl)acetate (**18**) ( $\text{CDCl}_3$ )

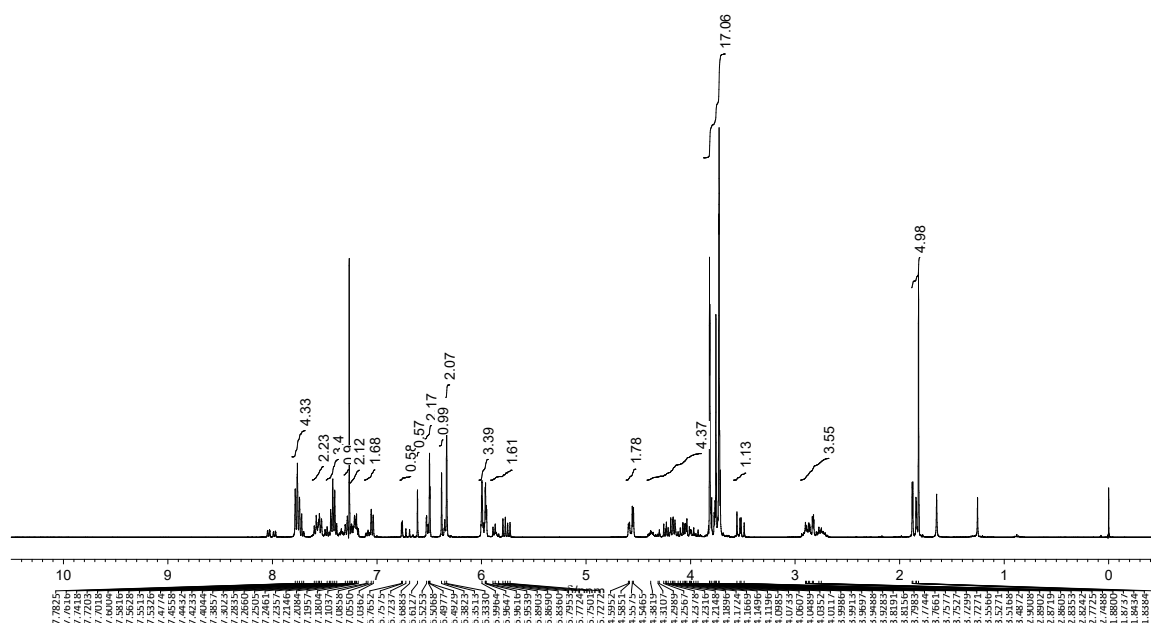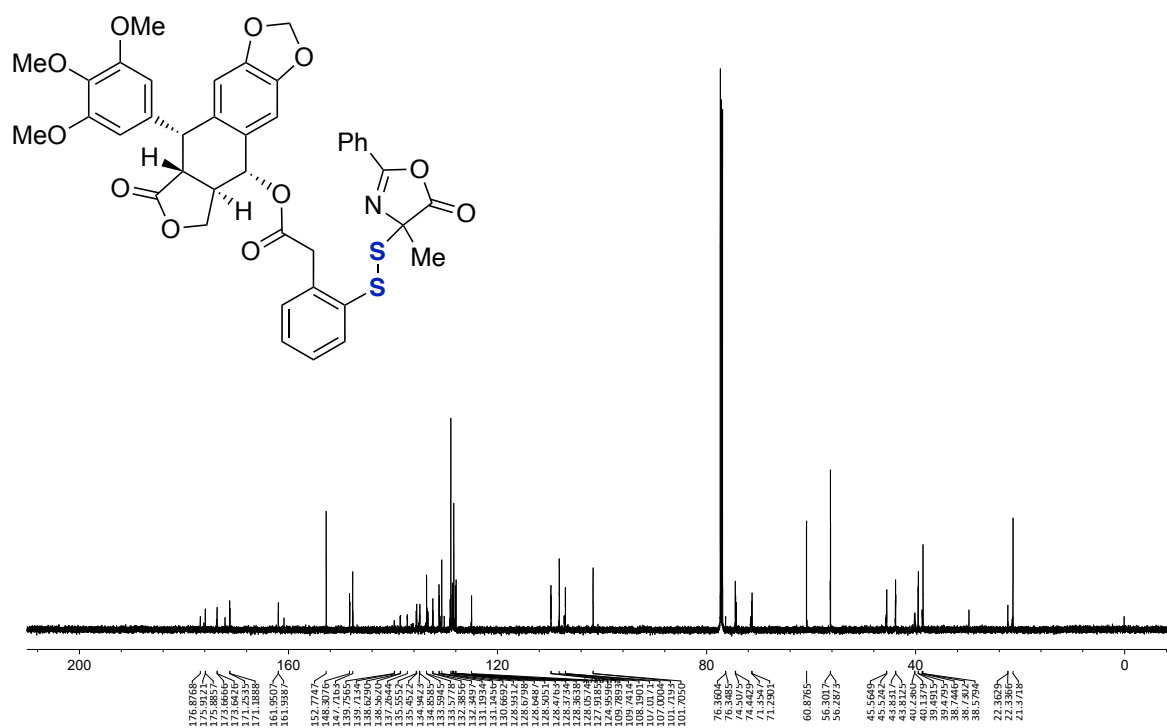

$^1\text{H}$  NMR (400 MHz) and  $^{13}\text{C}$  NMR (150 MHz) spectra of benzyl  $N^6$ -(2-benzamido-2-((2-(2-oxo-2-(((5*R*,5*aR*,8*aR*,9*R*)-8-oxo-9-(3,4,5-trimethoxyphenyl)-5,5*a*,6,8,8*a*,9-hexahydrofuro[3',4':6,7]naphtho[2,3-*d*][1,3]dioxol-5-yl)oxy)ethyl)phenyl)disulfanyl)propanoyl)- $N^2$ -((benzyloxy)carbonyl)-*L*-lysinate (**20**) ( $\text{CDCl}_3$ )

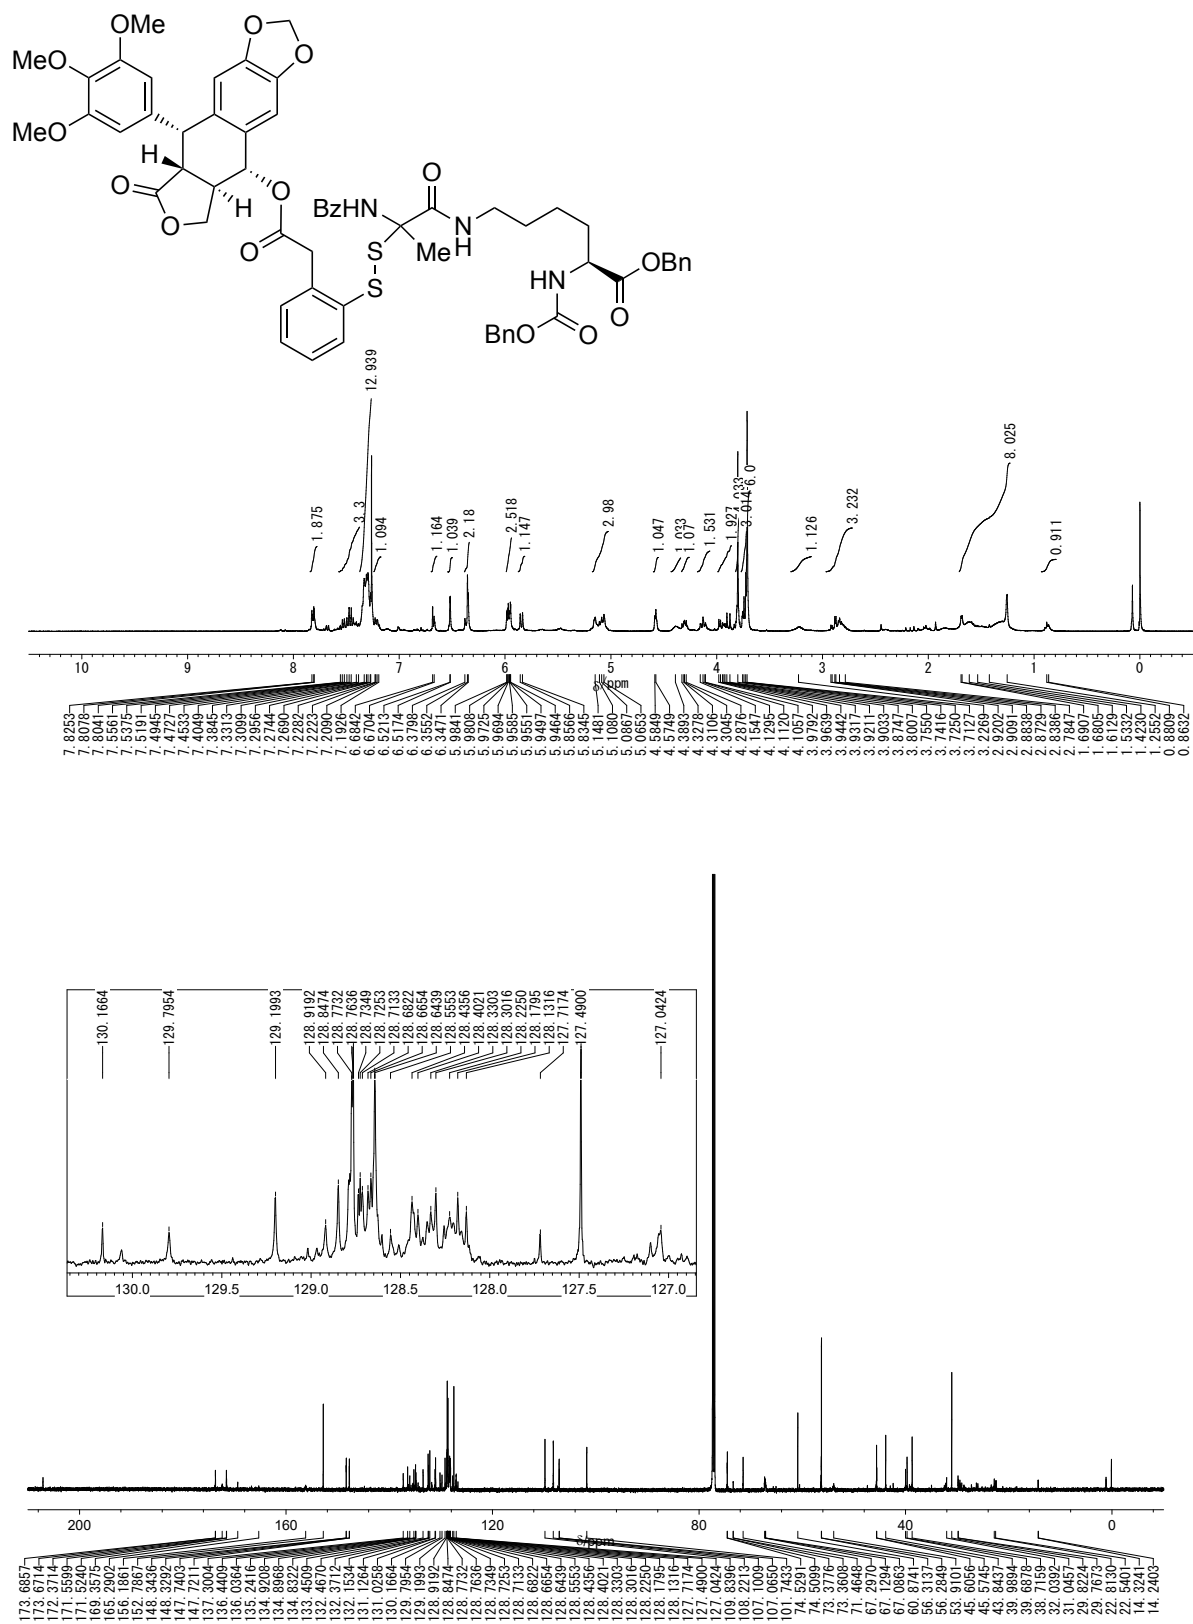

$^1\text{H}$  NMR (400 MHz) and  $^{13}\text{C}$  NMR (101 MHz) spectra of 2-(((4-methyl-5-oxo-2-phenyl-4,5-dihydrooxazol-4-yl)disulfanyl)methyl)allyl (2*S*)-2-(4-isobutylphenyl)propanoate (**22**) ( $\text{CDCl}_3$ )

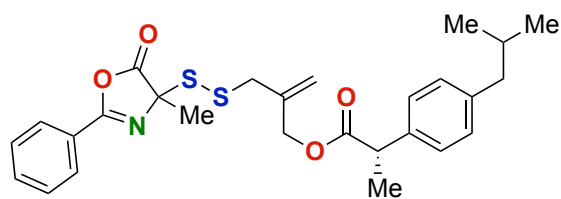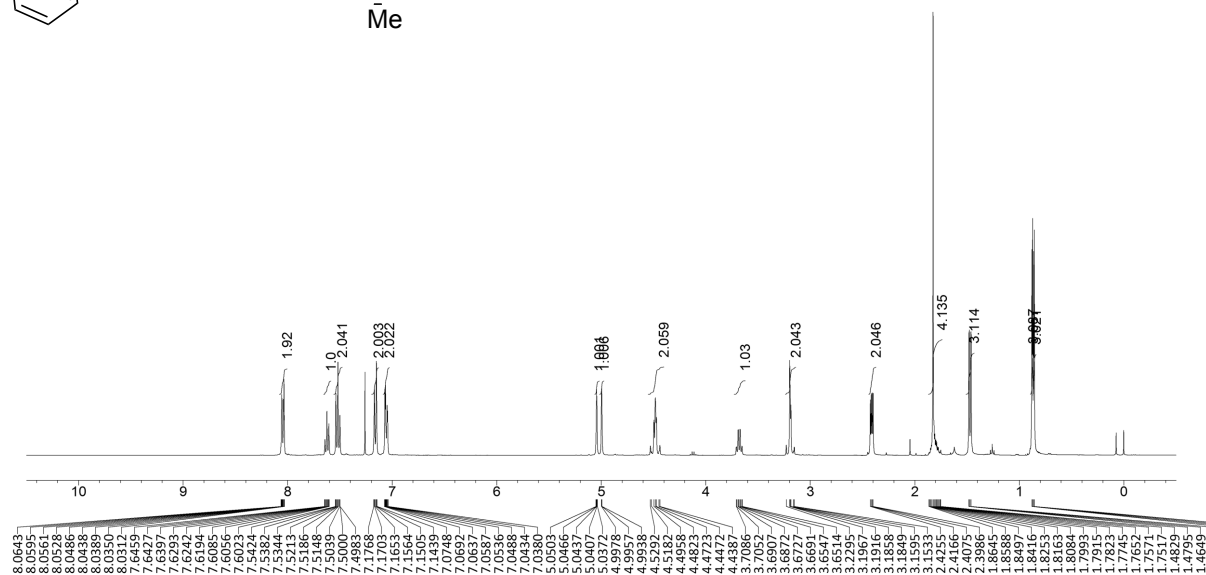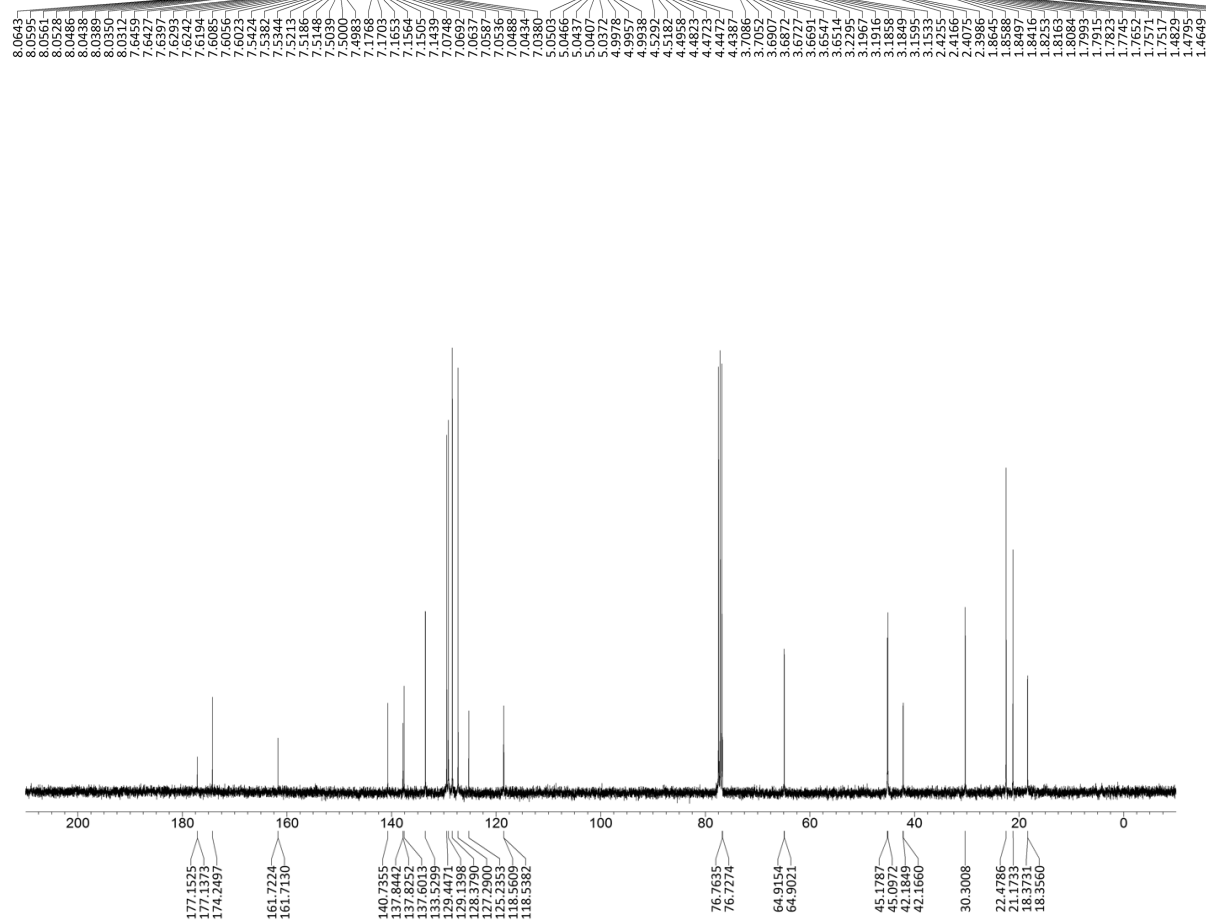

$^1\text{H}$  NMR (400 MHz,  $\text{CDCl}_3$ ) and  $^{13}\text{C}$  NMR (150 MHz,  $\text{CD}_3\text{OD}$ ) spectra of 10-benzamido-10-methyl-14-methylene-3,6,9-trioxo-2-oxa-11,12-dithia-5,8-diazapentadecan-15-yl (2*S*)-2-(4-isobutylphenyl)propanoate (**24**)

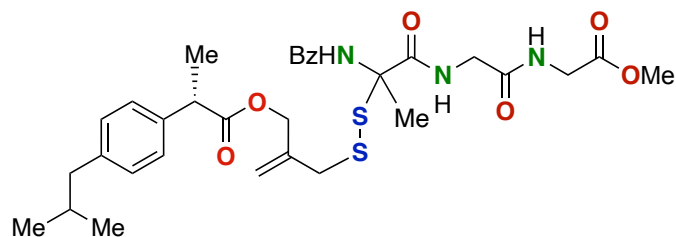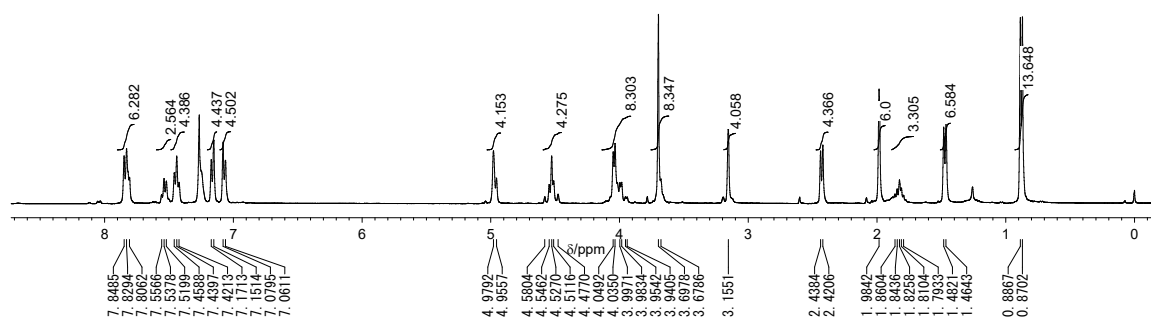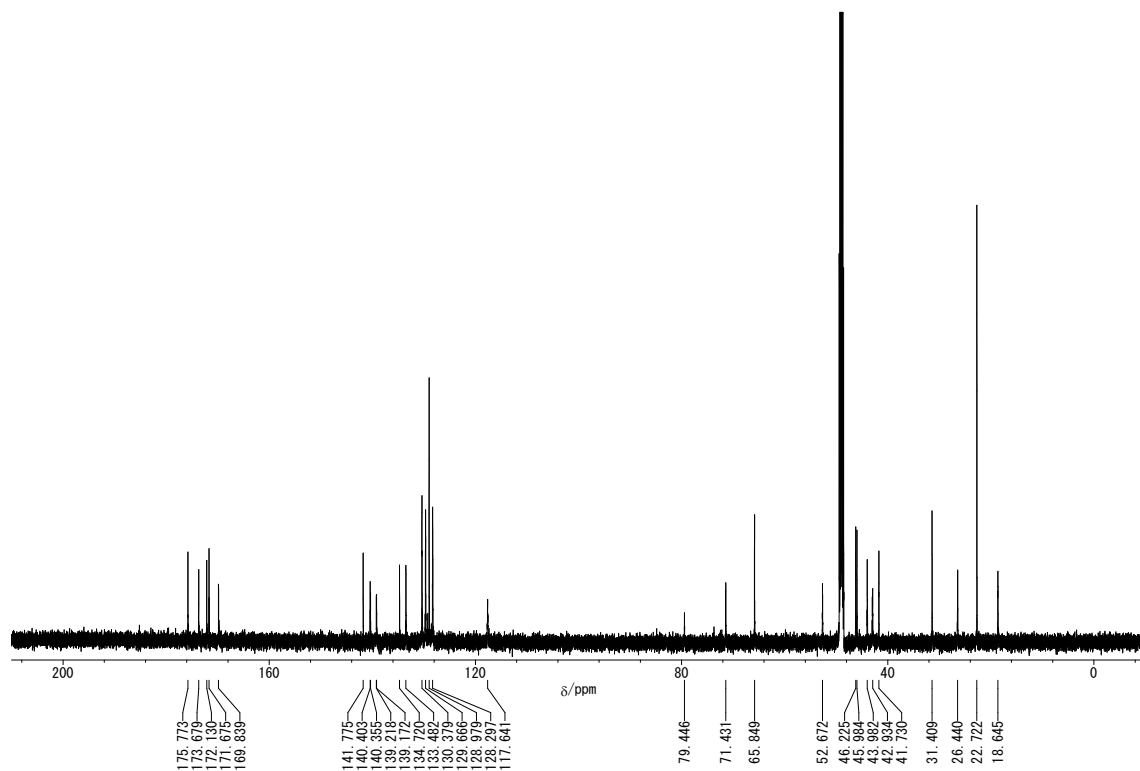

$^1\text{H}$  NMR (600 MHz) and  $^{13}\text{C}$  NMR (150 MHz) spectra of methyl (2-(allyldisulfanyl)-2-(2-((*tert*-butoxycarbonyl)amino)acetamido)-3-phenylpropanoyl)glycinate (**26**) ( $\text{CDCl}_3$ )

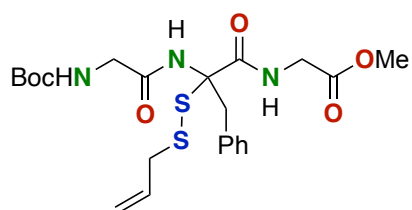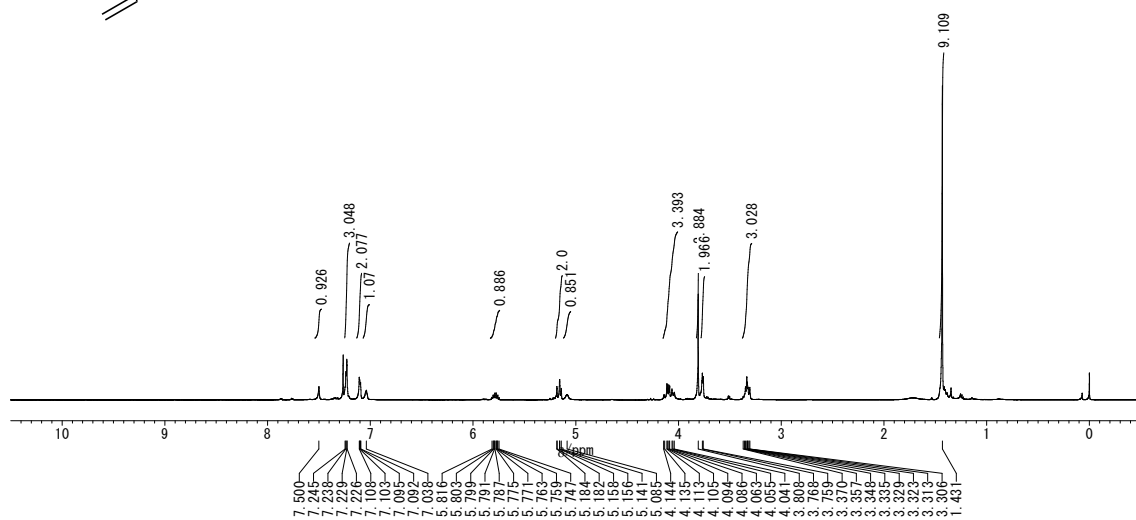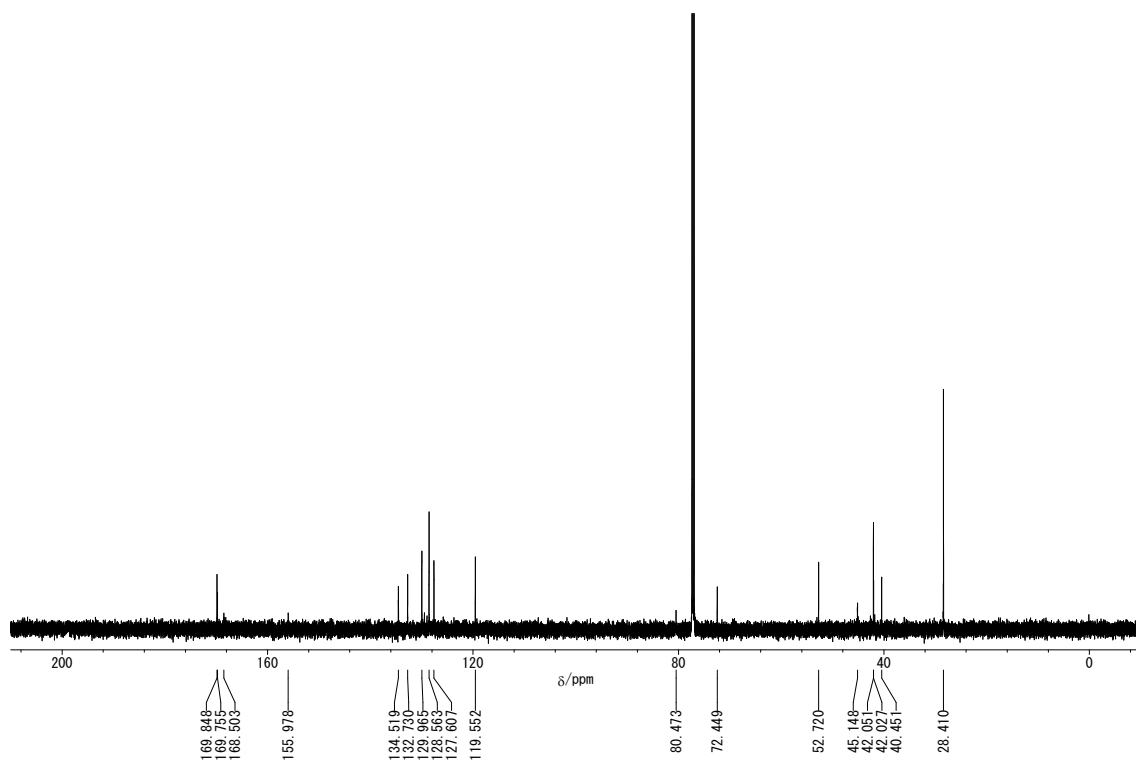



$^1\text{H}$  NMR (400 MHz) and  $^{13}\text{C}$  NMR (150 MHz) spectra of TFA salt of methyl (2-(allyldisulfanyl)-2-(2-aminoacetamido)-3-phenylpropanoyl)glycinate (**27**·TFA) ( $\text{CD}_3\text{OD}$ , Isolated as the TFA salt with slight impurities.)

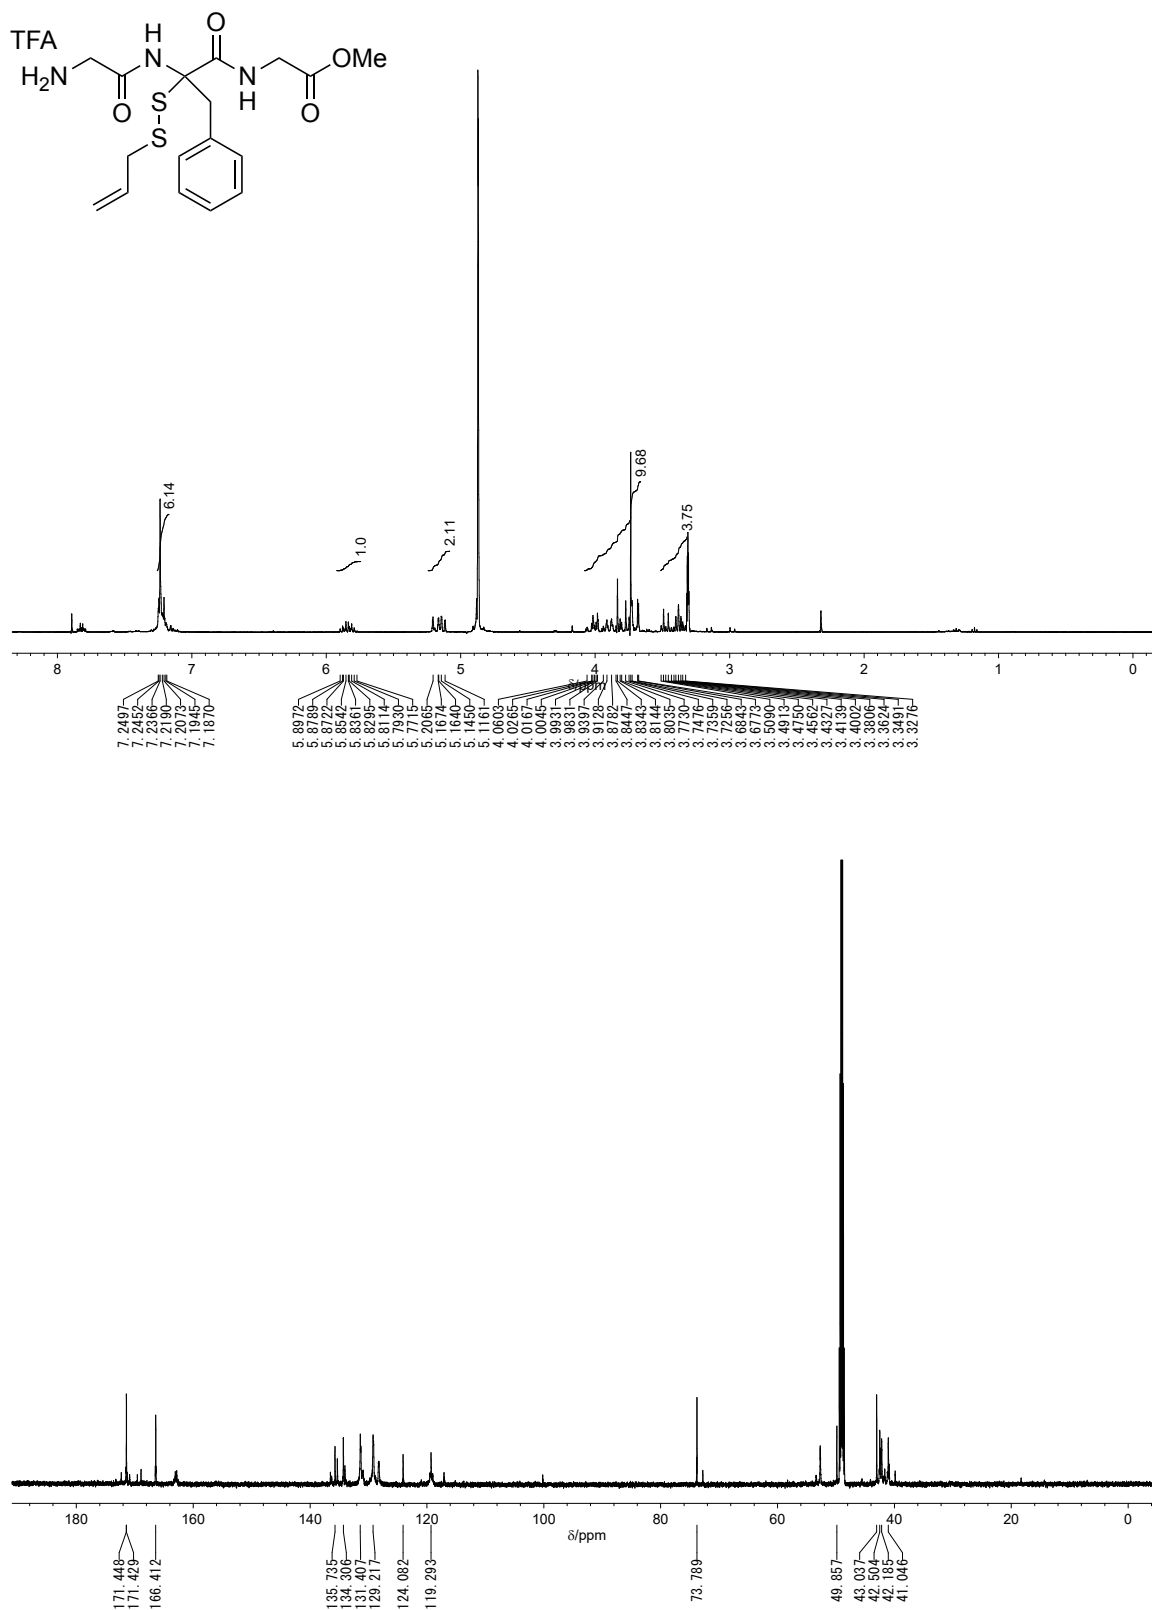

$^1\text{H}$  NMR (400 MHz) and  $^{13}\text{C}$  NMR (150 MHz) spectra of methyl (2-(allyldisulfanyl)-2-(2-(2-(allyldisulfanyl)-2-benzamidopropanamido)acetamido)-3-phenylpropanoyl)glycinate (28) ( $\text{CDCl}_3$ )

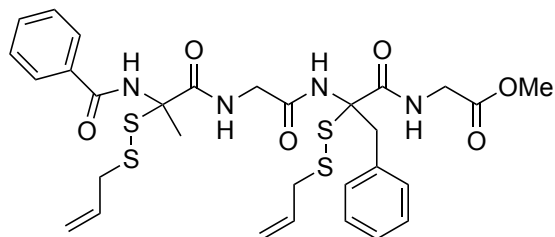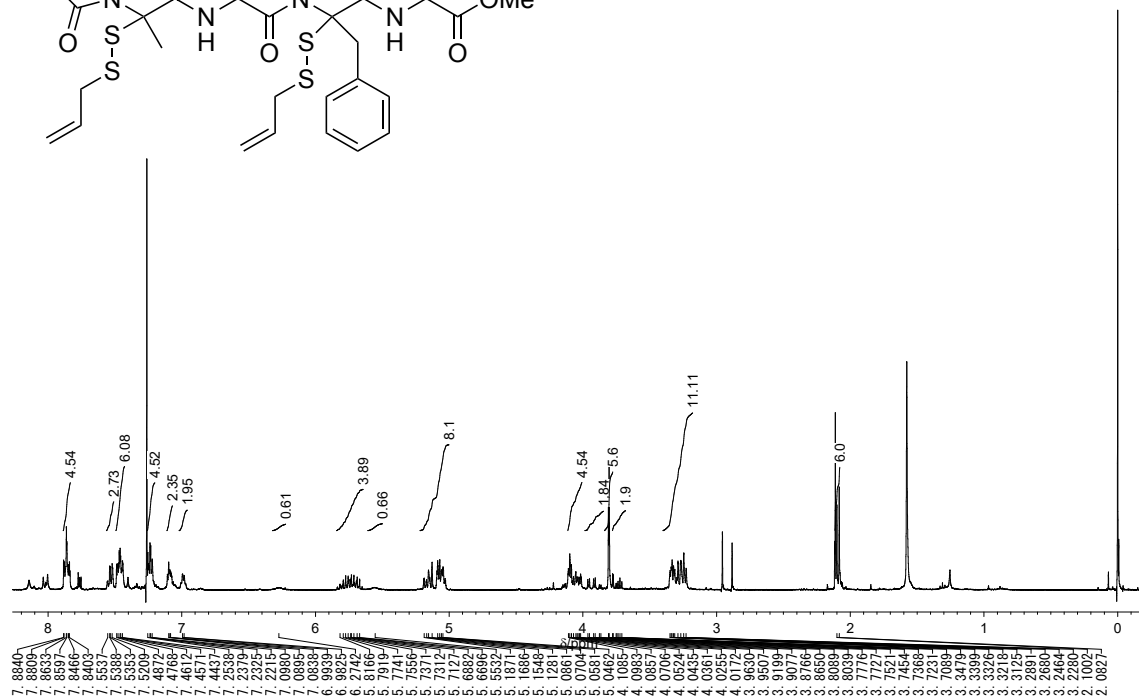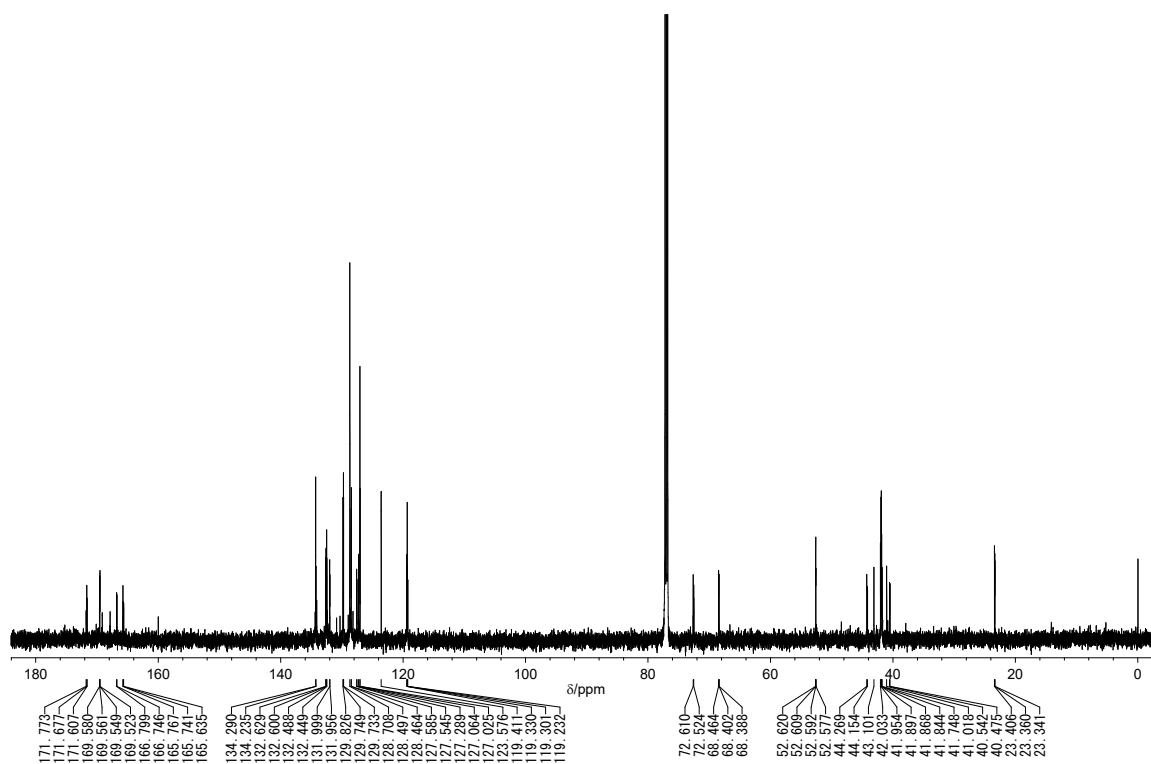

$^1\text{H}$  NMR (400 MHz) and  $^{13}\text{C}$  NMR (150 MHz) spectra of (2*S*)-1-((2-(allyldisulfanyl)-2-benzamidopropanoyl)glycylglycyl-L-valyl-L-leucyl-L-valyl-L-glutaminy)-*N*-(2-amino-2-oxoethyl)pyrrolidine-2-carboxamide (**30**) ( $\text{CD}_3\text{OD}$ )

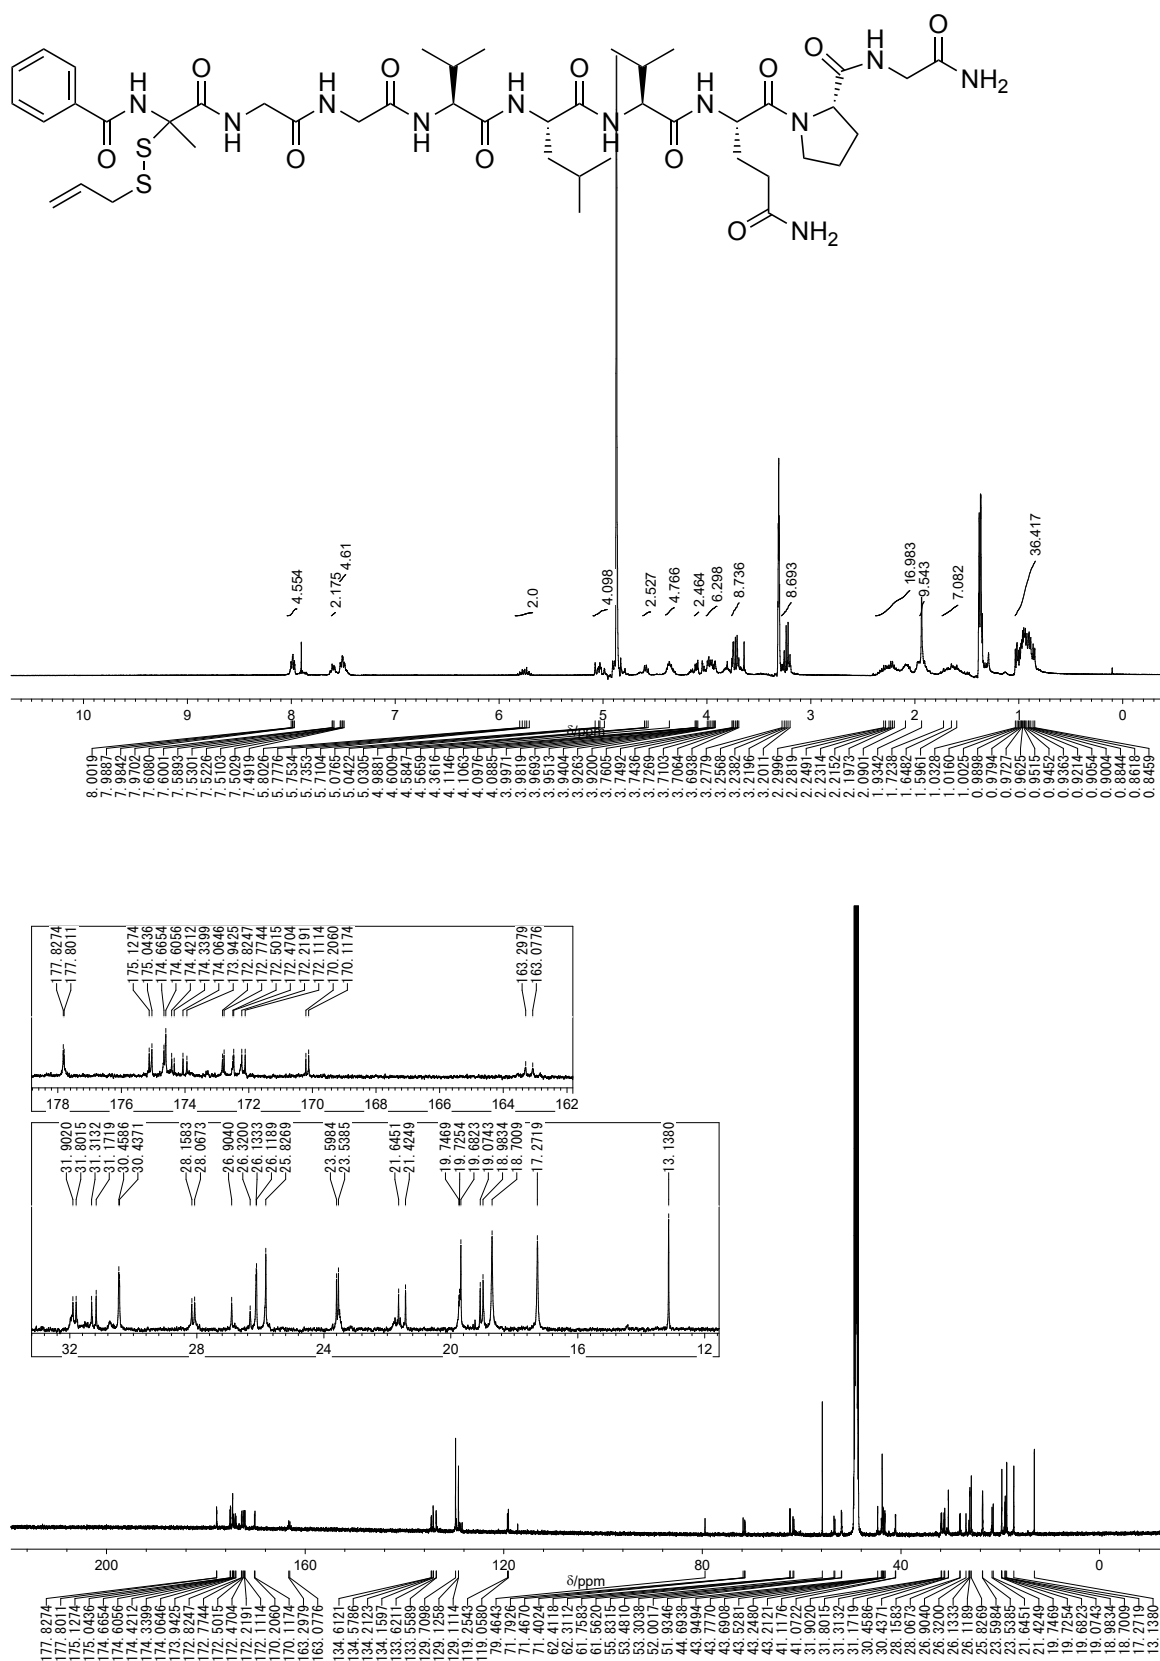

Supplement: SC-OLF-D4SC07187E-s001.pdf [file SC-OLF-D4SC07187E-s001.pdf]
